# Supplementary material for: Quantitative Trait Loci Affecting Liver Fat Content in Mice
Source: PubMed Central journal article supplement (PMC3429915; doi:10.1534/g3.112.003343), 2012-09-01
Supplement: supp_2.9.1019_003343SI.pdf [file supp_2.9.1019_003343SI.pdf]

**Table S1** Number of mice (N), average liver fat content and standard deviation (SD), average liver fattiness and standard deviation (SD), by cohort.

| Cohort        | N         | Liver Fat Content |             | Liver Fattiness |             |
|---------------|-----------|-------------------|-------------|-----------------|-------------|
|               |           | Average (%)       | SD          | Average (mg)    | SD          |
| <b>4 All</b>  | <b>21</b> | <b>0.30</b>       | <b>0.04</b> | <b>1.02</b>     | <b>1.39</b> |
| 4 HF F        | 3         | 0.37              | 0.02        | 1.02            | 0.99        |
| 4 HF M        | 5         | 0.29              | 0.03        | 0.96            | 0.89        |
| 4 LF F        | 6         | 0.26              | 0.02        | 0.10            | 1.23        |
| 4 LF M        | 7         | 0.30              | 0.04        | 1.84            | 1.63        |
| <b>5 All</b>  | <b>28</b> | <b>0.26</b>       | <b>0.05</b> | <b>-0.04</b>    | <b>1.77</b> |
| 5 HF F        | 7         | 0.29              | 0.04        | 0.65            | 1.67        |
| 5 HF M        | 9         | 0.24              | 0.04        | -0.65           | 1.48        |
| 5 LF F        | 7         | 0.27              | 0.05        | -0.55           | 2.21        |
| 5 LF M        | 5         | 0.26              | 0.03        | 0.79            | 1.55        |
| <b>10 All</b> | <b>26</b> | <b>0.25</b>       | <b>0.06</b> | <b>-0.43</b>    | <b>2.53</b> |
| 10 HF F       | 5         | 0.34              | 0.03        | 1.40            | 1.96        |
| 10 HF M       | 7         | 0.25              | 0.05        | -0.06           | 2.21        |
| 10 LF F       | 6         | 0.26              | 0.02        | 0.61            | 0.75        |
| 10 LF M       | 8         | 0.19              | 0.04        | -2.68           | 2.60        |
| <b>15 All</b> | <b>31</b> | <b>0.22</b>       | <b>0.05</b> | <b>-1.27</b>    | <b>1.94</b> |
| 15 HF F       | 6         | 0.23              | 0.05        | -2.15           | 2.75        |
| 15 HF M       | 9         | 0.21              | 0.05        | -1.64           | 2.19        |
| 15 LF F       | 9         | 0.24              | 0.04        | -1.25           | 1.40        |
| 15 LF M       | 7         | 0.20              | 0.02        | -0.20           | 1.09        |
| <b>18 All</b> | <b>28</b> | <b>0.29</b>       | <b>0.07</b> | <b>0.94</b>     | <b>2.18</b> |
| 18 HF F       | 6         | 0.31              | 0.03        | 1.22            | 0.99        |
| 18 HF M       | 7         | 0.35              | 0.07        | 3.05            | 1.76        |
| 18 LF F       | 9         | 0.23              | 0.03        | -1.02           | 1.28        |
| 18 LF M       | 6         | 0.29              | 0.08        | 1.15            | 2.23        |
| <b>19 All</b> | <b>31</b> | <b>0.26</b>       | <b>0.04</b> | <b>0.41</b>     | <b>1.54</b> |
| 19HF F        | 7         | 0.30              | 0.05        | 1.20            | 0.40        |
| 19 HF M       | 8         | 0.26              | 0.02        | 0.07            | 1.62        |
| 19 LF F       | 7         | 0.26              | 0.04        | 0.05            | 1.12        |
| 19 LF M       | 9         | 0.24              | 0.05        | 0.35            | 2.19        |

|               |           |             |             |              |             |
|---------------|-----------|-------------|-------------|--------------|-------------|
| <b>20 All</b> | <b>16</b> | <b>0.25</b> | <b>0.13</b> | <b>-1.12</b> | <b>2.50</b> |
| 20 HF F       | 2         | 0.22        | 0.00        | -1.32        | 0.89        |
| 20 HF M       | 4         | 0.24        | 0.19        | -1.95        | 1.55        |
| 20 LF F       | 5         | 0.26        | 0.14        | -1.66        | 2.10        |
| 20 LF M       | 5         | 0.25        | 0.12        | 0.17         | 3.74        |
| <b>22 All</b> | <b>44</b> | <b>0.37</b> | <b>0.10</b> | <b>2.30</b>  | <b>2.44</b> |
| 22 HF F       | 12        | 0.41        | 0.06        | 3.42         | 1.82        |
| 22 HF M       | 12        | 0.46        | 0.05        | 3.55         | 2.25        |
| 22 LF F       | 12        | 0.32        | 0.06        | 1.00         | 2.63        |
| 22 LF M       | 8         | 0.26        | 0.08        | 0.69         | 1.38        |
| <b>23 All</b> | <b>38</b> | <b>0.26</b> | <b>0.06</b> | <b>0.48</b>  | <b>2.03</b> |
| 23 HF F       | 7         | 0.31        | 0.07        | 1.72         | 2.71        |
| 23 HF M       | 10        | 0.25        | 0.06        | -0.02        | 1.50        |
| 23 LF F       | 9         | 0.25        | 0.05        | -0.48        | 1.73        |
| 23 LF M       | 12        | 0.24        | 0.04        | 0.89         | 1.94        |
| <b>31 All</b> | <b>11</b> | <b>0.26</b> | <b>0.04</b> | <b>0.19</b>  | <b>2.34</b> |
| 31 HF F       | 4         | 0.27        | 0.05        | -0.21        | 2.17        |
| 31 HF M       | 5         | 0.26        | 0.05        | 1.19         | 1.37        |
| 31 LF F       | 1         | 0.19        | --          | -5.26        | --          |
| 31 LF M       | 2         | 0.28        | 0.01        | 1.22         | 1.04        |
| <b>33 All</b> | <b>23</b> | <b>0.28</b> | <b>0.08</b> | <b>0.74</b>  | <b>1.79</b> |
| 33 HF F       | 4         | 0.40        | 0.09        | 3.20         | 0.83        |
| 33 HF M       | 7         | 0.28        | 0.05        | 0.65         | 1.20        |
| 33 LF F       | 7         | 0.23        | 0.03        | -0.33        | 0.98        |
| 33 LF M       | 5         | 0.23        | 0.02        | 0.39         | 2.27        |
| <b>35 All</b> | <b>26</b> | <b>0.25</b> | <b>0.07</b> | <b>-0.16</b> | <b>1.60</b> |
| 35 HF F       | 6         | 0.26        | 0.04        | -0.45        | 1.50        |
| 35 HF M       | 5         | 0.36        | 0.09        | 0.88         | 2.12        |
| 35 LF F       | 7         | 0.20        | 0.03        | -1.07        | 1.34        |
| 35 LF M       | 8         | 0.23        | 0.04        | 0.08         | 1.11        |

|               |           |             |             |              |             |
|---------------|-----------|-------------|-------------|--------------|-------------|
| <b>38 All</b> | <b>30</b> | <b>0.21</b> | <b>0.05</b> | <b>-1.43</b> | <b>1.95</b> |
| 38 HF F       | 7         | 0.25        | 0.04        | -2.64        | 3.15        |
| 38 HF M       | 7         | 0.18        | 0.04        | -0.95        | 1.33        |
| 38 LF F       | 8         | 0.23        | 0.04        | -0.78        | 1.21        |
| 38 LF M       | 8         | 0.17        | 0.03        | -1.44        | 1.45        |
| <br>          |           |             |             |              |             |
| <b>45 All</b> | <b>16</b> | <b>0.29</b> | <b>0.03</b> | <b>0.64</b>  | <b>2.85</b> |
| 45 HF F       | 5         | 0.29        | 0.03        | 0.05         | 3.60        |
| 45 HF M       | 3         | 0.31        | 0.02        | 2.72         | 0.67        |
| 45 LF F       | 5         | 0.27        | 0.04        | -1.16        | 2.58        |
| 45 LF M       | 3         | 0.32        | 0.02        | 2.51         | 0.72        |
| <br>          |           |             |             |              |             |
| <b>46 All</b> | <b>27</b> | <b>0.23</b> | <b>0.06</b> | <b>-0.40</b> | <b>2.14</b> |
| 46 HF F       | 5         | 0.23        | 0.09        | -1.00        | 3.73        |
| 46 HF M       | 6         | 0.24        | 0.07        | 0.29         | 1.18        |
| 46 LF F       | 8         | 0.21        | 0.04        | -1.15        | 1.59        |
| 46 LF M       | 8         | 0.24        | 0.05        | 0.21         | 1.96        |
| <br>          |           |             |             |              |             |
| <b>48 All</b> | <b>28</b> | <b>0.31</b> | <b>0.11</b> | <b>1.14</b>  | <b>3.19</b> |
| 48 HF F       | 6         | 0.37        | 0.10        | 2.09         | 4.15        |
| 48 HF M       | 7         | 0.43        | 0.05        | 4.40         | 1.41        |
| 48 LF F       | 9         | 0.22        | 0.06        | -0.92        | 2.02        |
| 48 LF M       | 6         | 0.22        | 0.05        | -0.52        | 1.38        |
| <br>          |           |             |             |              |             |
| <b>LG All</b> | <b>25</b> | <b>0.19</b> | <b>0.05</b> | <b>-3.60</b> | <b>2.97</b> |
| LG HF F       | 6         | 0.24        | 0.02        | -4.63        | 3.32        |
| LG HF M       | 7         | 0.22        | 0.03        | -2.13        | 2.32        |
| LG LF F       | 6         | 0.15        | 0.03        | -3.36        | 4.09        |
| LG LF M       | 6         | 0.13        | 0.02        | -4.27        | 1.74        |
| <br>          |           |             |             |              |             |
| <b>SM All</b> | <b>29</b> | <b>0.25</b> | <b>0.11</b> | <b>-0.94</b> | <b>2.48</b> |
| SM HF F       | 6         | 0.33        | 0.05        | -0.18        | 1.97        |
| SM HF M       | 11        | 0.33        | 0.10        | 0.41         | 2.51        |
| SM LF F       | 6         | 0.14        | 0.02        | -2.58        | 2.20        |
| SM LF M       | 6         | 0.14        | 0.02        | -2.52        | 1.50        |

---

**Table S2 Hepatic fat phenotypes.**

|    | <b>Sex</b> | <b>Diet</b> | <b>Strain</b> | <b>Fattiness</b> | <b>Fat Content</b> |
|----|------------|-------------|---------------|------------------|--------------------|
| 1  | ♀          | LF          | SM/J          | -4.89            | 0.17               |
| 2  | ♀          | LF          | SM/J          | -4.76            | 0.12               |
| 3  | ♂          | LF          | SM/J          | -4.48            | 0.11               |
| 4  | ♂          | LF          | SM/J          | -3.87            | 0.11               |
| 5  | ♂          | HF          | SM/J          | -3.86            | 0.16               |
| 6  | ♀          | LF          | SM/J          | -3.34            | 0.14               |
| 7  | ♂          | LF          | SM/J          | -2.55            | 0.13               |
| 8  | ♀          | LF          | SM/J          | -2.50            | 0.16               |
| 9  | ♀          | HF          | SM/J          | -2.33            | 0.32               |
| 10 | ♂          | LF          | SM/J          | -2.02            | 0.17               |
| 11 | ♂          | LF          | SM/J          | -1.91            | 0.15               |
| 12 | ♀          | HF          | SM/J          | -1.55            | 0.31               |
| 13 | ♂          | HF          | SM/J          | -1.52            | 0.25               |
| 14 | ♀          | HF          | SM/J          | -1.37            | 0.29               |
| 15 | ♂          | HF          | SM/J          | -0.86            | 0.29               |
| 16 | ♂          | HF          | SM/J          | -0.83            | 0.15               |
| 17 | ♂          | HF          | SM/J          | -0.54            | 0.37               |
| 18 | ♀          | LF          | SM/J          | -0.29            | 0.14               |
| 19 | ♂          | LF          | SM/J          | -0.29            | 0.15               |
| 20 | ♀          | HF          | SM/J          | -0.03            | 0.28               |
| 21 | ♂          | HF          | SM/J          | 0.15             | 0.41               |
| 22 | ♀          | LF          | SM/J          | 0.31             | 0.14               |
| 23 | ♂          | HF          | SM/J          | 0.85             | 0.34               |
| 24 | ♂          | HF          | SM/J          | 0.87             | 0.45               |
| 25 | ♂          | HF          | SM/J          | 0.97             | 0.37               |
| 26 | ♀          | HF          | SM/J          | 1.39             | 0.39               |
| 27 | ♀          | HF          | SM/J          | 2.81             | 0.37               |
| 28 | ♂          | HF          | SM/J          | 4.20             | 0.43               |
| 29 | ♂          | HF          | SM/J          | 5.06             | 0.40               |
| 30 | ♀          | LF          | LG/J          | -9.99            | 0.14               |
| 31 | ♀          | HF          | LG/J          | -8.94            | 0.24               |
| 32 | ♀          | HF          | LG/J          | -7.72            | 0.23               |
| 33 | ♂          | LF          | LG/J          | -6.71            | 0.15               |
| 34 | ♀          | LF          | LG/J          | -6.05            | 0.12               |
| 35 | ♀          | HF          | LG/J          | -5.33            | 0.23               |
| 36 | ♂          | LF          | LG/J          | -5.26            | 0.12               |
| 37 | ♂          | LF          | LG/J          | -5.21            | 0.11               |
| 38 | ♂          | HF          | LG/J          | -4.81            | 0.25               |

|    |   |    |      |       |      |
|----|---|----|------|-------|------|
| 39 | ♂ | HF | LG/J | -4.31 | 0.17 |
| 40 | ♀ | LF | LG/J | -3.82 | 0.12 |
| 41 | ♂ | LF | LG/J | -3.61 | 0.14 |
| 42 | ♀ | HF | LG/J | -3.50 | 0.27 |
| 43 | ♂ | HF | LG/J | -3.03 | 0.20 |
| 44 | ♂ | LF | LG/J | -2.57 | 0.16 |
| 45 | ♂ | LF | LG/J | -2.28 | 0.13 |
| 46 | ♀ | HF | LG/J | -1.86 | 0.26 |
| 47 | ♂ | HF | LG/J | -1.19 | 0.21 |
| 48 | ♂ | HF | LG/J | -0.57 | 0.23 |
| 49 | ♀ | HF | LG/J | -0.42 | 0.23 |
| 50 | ♀ | LF | LG/J | -0.17 | 0.16 |
| 51 | ♀ | LF | LG/J | -0.11 | 0.19 |
| 52 | ♀ | LF | LG/J | 0.01  | 0.16 |
| 53 | ♂ | HF | LG/J | 1.15  | 0.22 |
| 54 | ♂ | LF | 4    | -1.31 | 0.24 |
| 55 | ♀ | LF | 4    | -1.27 | 0.23 |
| 56 | ♀ | LF | 4    | -1.13 | 0.25 |
| 57 | ♀ | LF | 4    | 0.02  | 0.29 |
| 58 | ♂ | HF | 4    | 0.12  | 0.26 |
| 59 | ♂ | HF | 4    | 0.12  | 0.27 |
| 60 | ♀ | LF | 4    | 0.13  | 0.26 |
| 61 | ♀ | HF | 4    | 0.16  | 0.35 |
| 62 | ♀ | HF | 4    | 0.79  | 0.37 |
| 63 | ♂ | HF | 4    | 0.87  | 0.27 |
| 64 | ♀ | LF | 4    | 0.92  | 0.28 |
| 65 | ♂ | LF | 4    | 1.33  | 0.33 |
| 66 | ♂ | HF | 4    | 1.51  | 0.33 |
| 67 | ♂ | LF | 4    | 1.81  | 0.33 |
| 68 | ♂ | LF | 4    | 1.84  | 0.35 |
| 69 | ♀ | LF | 4    | 1.97  | 0.27 |
| 70 | ♀ | HF | 4    | 2.11  | 0.40 |
| 71 | ♂ | HF | 4    | 2.16  | 0.32 |
| 72 | ♂ | LF | 4    | 2.29  | 0.28 |
| 73 | ♂ | LF | 4    | 3.21  | 0.29 |
| 74 | ♂ | LF | 4    | 3.75  | 0.29 |
| 75 | ♀ | LF | 5    | -3.73 | 0.25 |
| 76 | ♂ | HF | 5    | -2.64 | 0.22 |
| 77 | ♂ | HF | 5    | -2.43 | 0.28 |
| 78 | ♀ | LF | 5    | -1.79 | 0.23 |
| 79 | ♀ | LF | 5    | -1.79 | 0.24 |
| 80 | ♂ | HF | 5    | -1.37 | 0.26 |

|     |   |    |    |       |      |
|-----|---|----|----|-------|------|
| 81  | ♀ | HF | 5  | -1.36 | 0.22 |
| 82  | ♂ | LF | 5  | -1.01 | 0.22 |
| 83  | ♀ | HF | 5  | -0.94 | 0.27 |
| 84  | ♂ | HF | 5  | -0.93 | 0.20 |
| 85  | ♂ | HF | 5  | -0.92 | 0.23 |
| 86  | ♀ | HF | 5  | -0.86 | 0.27 |
| 87  | ♀ | LF | 5  | -0.46 | 0.32 |
| 88  | ♂ | LF | 5  | -0.42 | 0.30 |
| 89  | ♂ | HF | 5  | -0.39 | 0.19 |
| 90  | ♂ | HF | 5  | -0.14 | 0.20 |
| 91  | ♀ | LF | 5  | -0.10 | 0.23 |
| 92  | ♂ | LF | 5  | 0.77  | 0.23 |
| 93  | ♀ | LF | 5  | 0.86  | 0.25 |
| 94  | ♀ | HF | 5  | 0.93  | 0.28 |
| 95  | ♂ | HF | 5  | 1.18  | 0.30 |
| 96  | ♂ | HF | 5  | 1.79  | 0.28 |
| 97  | ♂ | LF | 5  | 1.99  | 0.24 |
| 98  | ♀ | HF | 5  | 2.01  | 0.33 |
| 99  | ♀ | HF | 5  | 2.27  | 0.33 |
| 100 | ♀ | HF | 5  | 2.47  | 0.34 |
| 101 | ♂ | LF | 5  | 2.63  | 0.29 |
| 102 | ♀ | LF | 5  | 3.18  | 0.35 |
| 103 | ♂ | LF | 10 | -6.86 | 0.16 |
| 104 | ♂ | LF | 10 | -5.55 | 0.18 |
| 105 | ♂ | LF | 10 | -3.55 | 0.15 |
| 106 | ♂ | HF | 10 | -3.15 | 0.28 |
| 107 | ♂ | LF | 10 | -2.87 | 0.20 |
| 108 | ♂ | LF | 10 | -2.28 | 0.18 |
| 109 | ♂ | HF | 10 | -1.41 | 0.17 |
| 110 | ♂ | HF | 10 | -0.85 | 0.20 |
| 111 | ♂ | HF | 10 | -0.84 | 0.25 |
| 112 | ♀ | HF | 10 | -0.64 | 0.35 |
| 113 | ♂ | LF | 10 | -0.52 | 0.26 |
| 114 | ♂ | LF | 10 | -0.34 | 0.24 |
| 115 | ♀ | LF | 10 | -0.06 | 0.25 |
| 116 | ♀ | LF | 10 | 0.03  | 0.24 |
| 117 | ♀ | HF | 10 | 0.21  | 0.38 |
| 118 | ♀ | LF | 10 | 0.37  | 0.26 |
| 119 | ♀ | LF | 10 | 0.39  | 0.30 |
| 120 | ♀ | HF | 10 | 0.44  | 0.30 |
| 121 | ♂ | HF | 10 | 0.50  | 0.24 |
| 122 | ♂ | LF | 10 | 0.57  | 0.18 |

|     |   |    |    |       |      |
|-----|---|----|----|-------|------|
| 123 | ♀ | LF | 10 | 0.99  | 0.27 |
| 124 | ♂ | HF | 10 | 1.74  | 0.28 |
| 125 | ♀ | LF | 10 | 1.94  | 0.27 |
| 126 | ♀ | HF | 10 | 3.48  | 0.33 |
| 127 | ♀ | HF | 10 | 3.54  | 0.35 |
| 128 | ♂ | HF | 10 | 3.58  | 0.32 |
| 129 | ♀ | HF | 15 | -5.93 | 0.14 |
| 130 | ♂ | HF | 15 | -5.72 | 0.15 |
| 131 | ♀ | HF | 15 | -4.23 | 0.26 |
| 132 | ♀ | LF | 15 | -3.77 | 0.18 |
| 133 | ♂ | HF | 15 | -3.35 | 0.15 |
| 134 | ♀ | HF | 15 | -3.22 | 0.18 |
| 135 | ♂ | HF | 15 | -3.21 | 0.29 |
| 136 | ♀ | LF | 15 | -2.86 | 0.30 |
| 137 | ♂ | LF | 15 | -2.78 | 0.23 |
| 138 | ♂ | HF | 15 | -2.01 | 0.15 |
| 139 | ♀ | LF | 15 | -1.31 | 0.29 |
| 140 | ♂ | HF | 15 | -1.26 | 0.17 |
| 141 | ♀ | LF | 15 | -1.07 | 0.20 |
| 142 | ♀ | HF | 15 | -0.97 | 0.26 |
| 143 | ♂ | HF | 15 | -0.88 | 0.19 |
| 144 | ♀ | LF | 15 | -0.88 | 0.23 |
| 145 | ♀ | LF | 15 | -0.40 | 0.21 |
| 146 | ♂ | LF | 15 | -0.29 | 0.19 |
| 147 | ♂ | HF | 15 | -0.29 | 0.26 |
| 148 | ♂ | LF | 15 | -0.23 | 0.18 |
| 149 | ♀ | LF | 15 | 0.03  | 0.24 |
| 150 | ♂ | LF | 15 | 0.13  | 0.20 |
| 151 | ♂ | LF | 15 | 0.18  | 0.21 |
| 152 | ♀ | LF | 15 | 0.22  | 0.25 |
| 153 | ♂ | LF | 15 | 0.28  | 0.20 |
| 154 | ♂ | LF | 15 | 0.38  | 0.19 |
| 155 | ♀ | HF | 15 | 0.51  | 0.26 |
| 156 | ♂ | LF | 15 | 0.71  | 0.28 |
| 157 | ♂ | HF | 15 | 0.74  | 0.25 |
| 158 | ♀ | HF | 15 | 0.93  | 0.26 |
| 159 | ♂ | HF | 15 | 1.21  | 0.26 |
| 160 | ♀ | LF | 18 | -2.91 | 0.26 |
| 161 | ♀ | LF | 18 | -2.54 | 0.20 |
| 162 | ♂ | LF | 18 | -2.17 | 0.26 |
| 163 | ♀ | LF | 18 | -1.85 | 0.22 |
| 164 | ♀ | LF | 18 | -1.21 | 0.20 |

|     |   |    |    |       |      |
|-----|---|----|----|-------|------|
| 165 | ♀ | LF | 18 | -1.10 | 0.25 |
| 166 | ♀ | LF | 18 | -0.87 | 0.21 |
| 167 | ♀ | LF | 18 | 0.04  | 0.18 |
| 168 | ♀ | HF | 18 | 0.18  | 0.31 |
| 169 | ♀ | HF | 18 | 0.30  | 0.29 |
| 170 | ♂ | HF | 18 | 0.38  | 0.24 |
| 171 | ♂ | LF | 18 | 0.50  | 0.28 |
| 172 | ♀ | HF | 18 | 0.52  | 0.30 |
| 173 | ♀ | LF | 18 | 0.56  | 0.27 |
| 174 | ♀ | LF | 18 | 0.68  | 0.26 |
| 175 | ♂ | LF | 18 | 0.84  | 0.25 |
| 176 | ♂ | LF | 18 | 0.95  | 0.25 |
| 177 | ♂ | HF | 18 | 1.81  | 0.38 |
| 178 | ♀ | HF | 18 | 1.88  | 0.28 |
| 179 | ♀ | HF | 18 | 1.99  | 0.32 |
| 180 | ♂ | LF | 18 | 2.11  | 0.28 |
| 181 | ♀ | HF | 18 | 2.43  | 0.35 |
| 182 | ♂ | HF | 18 | 2.53  | 0.27 |
| 183 | ♂ | HF | 18 | 2.81  | 0.35 |
| 184 | ♂ | HF | 18 | 3.93  | 0.41 |
| 185 | ♂ | HF | 18 | 4.04  | 0.37 |
| 186 | ♂ | LF | 18 | 4.66  | 0.45 |
| 187 | ♂ | HF | 18 | 5.84  | 0.46 |
| 188 | ♂ | HF | 19 | -3.57 | 0.23 |
| 189 | ♂ | LF | 19 | -3.02 | 0.20 |
| 190 | ♀ | LF | 19 | -1.75 | 0.25 |
| 191 | ♂ | LF | 19 | -1.73 | 0.24 |
| 192 | ♂ | LF | 19 | -1.37 | 0.21 |
| 193 | ♂ | HF | 19 | -0.60 | 0.22 |
| 194 | ♀ | LF | 19 | -0.56 | 0.23 |
| 195 | ♀ | LF | 19 | -0.40 | 0.23 |
| 196 | ♀ | LF | 19 | -0.16 | 0.28 |
| 197 | ♂ | LF | 19 | -0.14 | 0.17 |
| 198 | ♂ | LF | 19 | 0.05  | 0.23 |
| 199 | ♂ | HF | 19 | 0.42  | 0.24 |
| 200 | ♂ | HF | 19 | 0.43  | 0.25 |
| 201 | ♂ | HF | 19 | 0.45  | 0.26 |
| 202 | ♀ | HF | 19 | 0.74  | 0.28 |
| 203 | ♂ | HF | 19 | 0.75  | 0.27 |
| 204 | ♀ | LF | 19 | 0.75  | 0.23 |
| 205 | ♀ | HF | 19 | 0.76  | 0.30 |
| 206 | ♂ | HF | 19 | 0.82  | 0.30 |



|     |   |    |    |       |      |
|-----|---|----|----|-------|------|
| 207 | ♀ | LF | 19 | 0.83  | 0.29 |
| 208 | ♀ | HF | 19 | 0.99  | 0.31 |
| 209 | ♂ | LF | 19 | 1.24  | 0.29 |
| 210 | ♀ | HF | 19 | 1.27  | 0.28 |
| 211 | ♀ | HF | 19 | 1.36  | 0.36 |
| 212 | ♀ | HF | 19 | 1.49  | 0.21 |
| 213 | ♀ | LF | 19 | 1.64  | 0.33 |
| 214 | ♀ | HF | 19 | 1.82  | 0.34 |
| 215 | ♂ | HF | 19 | 1.89  | 0.27 |
| 216 | ♂ | LF | 19 | 2.07  | 0.24 |
| 217 | ♂ | LF | 19 | 2.27  | 0.31 |
| 218 | ♂ | LF | 19 | 3.83  | 0.29 |
| 219 | ♀ | LF | 20 | -4.30 | 0.18 |
| 220 | ♂ | HF | 20 | -4.26 | 0.52 |
| 221 | ♂ | LF | 20 | -3.70 | 0.18 |
| 222 | ♀ | LF | 20 | -3.41 | 0.16 |
| 223 | ♂ | LF | 20 | -3.27 | 0.15 |
| 224 | ♀ | HF | 20 | -1.95 | 0.22 |
| 225 | ♂ | HF | 20 | -1.43 | 0.15 |
| 226 | ♂ | HF | 20 | -1.14 | 0.13 |
| 227 | ♂ | HF | 20 | -0.99 | 0.15 |
| 228 | ♀ | LF | 20 | -0.93 | 0.14 |
| 229 | ♀ | HF | 20 | -0.69 | 0.22 |
| 230 | ♀ | LF | 20 | -0.30 | 0.39 |
| 231 | ♂ | LF | 20 | 0.49  | 0.17 |
| 232 | ♀ | LF | 20 | 0.63  | 0.45 |
| 233 | ♂ | LF | 20 | 2.16  | 0.32 |
| 234 | ♂ | LF | 20 | 5.17  | 0.42 |
| 235 | ♀ | LF | 22 | -4.83 | 0.32 |
| 236 | ♀ | LF | 22 | -2.18 | 0.24 |
| 237 | ♂ | LF | 22 | -2.00 | 0.12 |
| 238 | ♂ | HF | 22 | -0.77 | 0.47 |
| 239 | ♀ | LF | 22 | -0.74 | 0.28 |
| 240 | ♂ | LF | 22 | -0.37 | 0.22 |
| 241 | ♀ | HF | 22 | -0.25 | 0.28 |
| 242 | ♀ | LF | 22 | -0.16 | 0.25 |
| 243 | ♂ | HF | 22 | 0.12  | 0.45 |
| 244 | ♀ | LF | 22 | 0.28  | 0.38 |
| 245 | ♂ | LF | 22 | 0.36  | 0.40 |
| 246 | ♂ | LF | 22 | 0.61  | 0.22 |
| 247 | ♀ | HF | 22 | 0.92  | 0.47 |
| 248 | ♂ | LF | 22 | 1.31  | 0.28 |

|     |   |    |    |       |      |
|-----|---|----|----|-------|------|
| 249 | ♂ | LF | 22 | 1.43  | 0.27 |
| 250 | ♀ | LF | 22 | 1.60  | 0.27 |
| 251 | ♀ | HF | 22 | 1.67  | 0.45 |
| 252 | ♂ | LF | 22 | 1.85  | 0.26 |
| 253 | ♂ | HF | 22 | 2.04  | 0.50 |
| 254 | ♀ | LF | 22 | 2.21  | 0.31 |
| 255 | ♂ | LF | 22 | 2.30  | 0.32 |
| 256 | ♀ | LF | 22 | 2.46  | 0.30 |
| 257 | ♀ | LF | 22 | 2.57  | 0.35 |
| 258 | ♂ | HF | 22 | 2.88  | 0.43 |
| 259 | ♀ | HF | 22 | 2.96  | 0.35 |
| 260 | ♂ | HF | 22 | 3.16  | 0.50 |
| 261 | ♀ | LF | 22 | 3.21  | 0.36 |
| 262 | ♀ | HF | 22 | 3.39  | 0.46 |
| 263 | ♂ | HF | 22 | 3.41  | 0.48 |
| 264 | ♀ | HF | 22 | 3.62  | 0.37 |
| 265 | ♂ | HF | 22 | 3.65  | 0.34 |
| 266 | ♀ | LF | 22 | 3.80  | 0.38 |
| 267 | ♀ | LF | 22 | 3.81  | 0.42 |
| 268 | ♀ | HF | 22 | 3.99  | 0.39 |
| 269 | ♀ | HF | 22 | 4.18  | 0.42 |
| 270 | ♀ | HF | 22 | 4.77  | 0.44 |
| 271 | ♀ | HF | 22 | 4.78  | 0.41 |
| 272 | ♂ | HF | 22 | 4.93  | 0.48 |
| 273 | ♂ | HF | 22 | 5.39  | 0.49 |
| 274 | ♀ | HF | 22 | 5.47  | 0.44 |
| 275 | ♀ | HF | 22 | 5.52  | 0.45 |
| 276 | ♂ | HF | 22 | 5.54  | 0.44 |
| 277 | ♂ | HF | 22 | 6.00  | 0.49 |
| 278 | ♂ | HF | 22 | 6.23  | 0.50 |
| 279 | ♀ | HF | 23 | -2.82 | 0.27 |
| 280 | ♂ | LF | 23 | -2.57 | 0.14 |
| 281 | ♂ | HF | 23 | -2.48 | 0.25 |
| 282 | ♂ | HF | 23 | -2.32 | 0.20 |
| 283 | ♀ | LF | 23 | -2.10 | 0.19 |
| 284 | ♀ | LF | 23 | -1.91 | 0.23 |
| 285 | ♀ | LF | 23 | -1.86 | 0.32 |
| 286 | ♀ | LF | 23 | -1.79 | 0.25 |
| 287 | ♀ | LF | 23 | -1.63 | 0.17 |
| 288 | ♀ | HF | 23 | -1.29 | 0.16 |
| 289 | ♂ | LF | 23 | -0.92 | 0.20 |
| 290 | ♂ | LF | 23 | -0.82 | 0.22 |

|     |   |    |    |       |      |
|-----|---|----|----|-------|------|
| 291 | ♂ | LF | 23 | -0.51 | 0.22 |
| 292 | ♂ | HF | 23 | -0.43 | 0.20 |
| 293 | ♂ | HF | 23 | -0.27 | 0.17 |
| 294 | ♂ | HF | 23 | 0.11  | 0.28 |
| 295 | ♂ | LF | 23 | 0.13  | 0.23 |
| 296 | ♂ | HF | 23 | 0.18  | 0.37 |
| 297 | ♀ | LF | 23 | 0.58  | 0.28 |
| 298 | ♂ | HF | 23 | 0.61  | 0.25 |
| 299 | ♂ | HF | 23 | 0.71  | 0.20 |
| 300 | ♀ | LF | 23 | 0.79  | 0.28 |
| 301 | ♂ | LF | 23 | 0.82  | 0.24 |
| 302 | ♂ | LF | 23 | 0.84  | 0.25 |
| 303 | ♀ | LF | 23 | 1.13  | 0.28 |
| 304 | ♂ | HF | 23 | 1.17  | 0.28 |
| 305 | ♂ | LF | 23 | 1.46  | 0.28 |
| 306 | ♀ | HF | 23 | 2.00  | 0.30 |
| 307 | ♂ | LF | 23 | 2.43  | 0.28 |
| 308 | ♂ | LF | 23 | 2.45  | 0.24 |
| 309 | ♂ | HF | 23 | 2.46  | 0.31 |
| 310 | ♀ | LF | 23 | 2.52  | 0.27 |
| 311 | ♀ | HF | 23 | 2.70  | 0.32 |
| 312 | ♂ | LF | 23 | 3.46  | 0.29 |
| 313 | ♀ | HF | 23 | 3.53  | 0.36 |
| 314 | ♂ | LF | 23 | 3.88  | 0.28 |
| 315 | ♀ | HF | 23 | 3.91  | 0.37 |
| 316 | ♀ | HF | 23 | 4.03  | 0.36 |
| 317 | ♀ | LF | 31 | -5.26 | 0.19 |
| 318 | ♀ | HF | 31 | -3.34 | 0.31 |
| 319 | ♂ | HF | 31 | -0.59 | 0.21 |
| 320 | ♀ | HF | 31 | 0.05  | 0.22 |
| 321 | ♂ | LF | 31 | 0.48  | 0.29 |
| 322 | ♂ | HF | 31 | 1.02  | 0.32 |
| 323 | ♂ | HF | 31 | 1.03  | 0.24 |
| 324 | ♀ | HF | 31 | 1.04  | 0.32 |
| 325 | ♂ | HF | 31 | 1.21  | 0.24 |
| 326 | ♀ | HF | 31 | 1.42  | 0.25 |
| 327 | ♂ | LF | 31 | 1.96  | 0.27 |
| 328 | ♂ | HF | 31 | 3.27  | 0.29 |
| 329 | ♂ | LF | 33 | -2.79 | 0.21 |
| 330 | ♀ | LF | 33 | -2.35 | 0.18 |
| 331 | ♂ | HF | 33 | -1.71 | 0.18 |
| 332 | ♂ | LF | 33 | -0.45 | 0.23 |

|     |   |    |    |       |      |
|-----|---|----|----|-------|------|
| 333 | ♀ | LF | 33 | -0.34 | 0.25 |
| 334 | ♀ | LF | 33 | -0.26 | 0.24 |
| 335 | ♀ | LF | 33 | -0.23 | 0.25 |
| 336 | ♀ | LF | 33 | -0.13 | 0.25 |
| 337 | ♀ | LF | 33 | 0.11  | 0.20 |
| 338 | ♂ | LF | 33 | 0.12  | 0.22 |
| 339 | ♂ | HF | 33 | 0.14  | 0.34 |
| 340 | ♂ | HF | 33 | 0.35  | 0.27 |
| 341 | ♀ | LF | 33 | 0.85  | 0.27 |
| 342 | ♂ | HF | 33 | 1.15  | 0.30 |
| 343 | ♂ | HF | 33 | 1.18  | 0.28 |
| 344 | ♂ | HF | 33 | 1.64  | 0.30 |
| 345 | ♂ | HF | 33 | 1.77  | 0.25 |
| 346 | ♂ | LF | 33 | 2.04  | 0.25 |
| 347 | ♀ | HF | 33 | 2.19  | 0.29 |
| 348 | ♀ | HF | 33 | 2.87  | 0.39 |
| 349 | ♂ | LF | 33 | 3.04  | 0.27 |
| 350 | ♀ | HF | 33 | 3.72  | 0.52 |
| 351 | ♀ | HF | 33 | 4.02  | 0.40 |
| 352 | ♀ | LF | 35 | -3.02 | 0.16 |
| 353 | ♀ | LF | 35 | -2.36 | 0.17 |
| 354 | ♂ | LF | 35 | -2.26 | 0.29 |
| 355 | ♂ | HF | 35 | -2.13 | 0.26 |
| 356 | ♀ | HF | 35 | -2.02 | 0.26 |
| 357 | ♀ | LF | 35 | -1.95 | 0.21 |
| 358 | ♀ | HF | 35 | -1.41 | 0.27 |
| 359 | ♀ | HF | 35 | -1.25 | 0.28 |
| 360 | ♀ | HF | 35 | -0.70 | 0.19 |
| 361 | ♂ | LF | 35 | -0.46 | 0.18 |
| 362 | ♂ | HF | 35 | -0.45 | 0.46 |
| 363 | ♀ | LF | 35 | -0.43 | 0.19 |
| 364 | ♀ | LF | 35 | -0.21 | 0.22 |
| 365 | ♂ | LF | 35 | 0.03  | 0.21 |
| 366 | ♀ | LF | 35 | 0.05  | 0.22 |
| 367 | ♂ | LF | 35 | 0.06  | 0.19 |
| 368 | ♀ | LF | 35 | 0.41  | 0.22 |
| 369 | ♂ | LF | 35 | 0.43  | 0.23 |
| 370 | ♂ | LF | 35 | 0.51  | 0.24 |
| 371 | ♂ | HF | 35 | 0.70  | 0.44 |
| 372 | ♀ | HF | 35 | 0.73  | 0.30 |
| 373 | ♂ | HF | 35 | 0.88  | 0.27 |
| 374 | ♂ | LF | 35 | 1.01  | 0.23 |

|     |   |    |    |       |      |
|-----|---|----|----|-------|------|
| 375 | ♂ | LF | 35 | 1.34  | 0.28 |
| 376 | ♀ | HF | 35 | 1.94  | 0.27 |
| 377 | ♂ | HF | 35 | 2.26  | 0.26 |
| 378 | ♂ | HF | 35 | 3.99  | 0.36 |
| 379 | ♀ | HF | 38 | -6.51 | 0.20 |
| 380 | ♀ | HF | 38 | -5.45 | 0.25 |
| 381 | ♀ | HF | 38 | -5.26 | 0.24 |
| 382 | ♂ | HF | 38 | -3.57 | 0.13 |
| 383 | ♂ | LF | 38 | -3.28 | 0.21 |
| 384 | ♂ | LF | 38 | -3.18 | 0.15 |
| 385 | ♀ | LF | 38 | -2.69 | 0.22 |
| 386 | ♀ | HF | 38 | -2.67 | 0.23 |
| 387 | ♂ | LF | 38 | -2.29 | 0.14 |
| 388 | ♀ | LF | 38 | -2.00 | 0.20 |
| 389 | ♂ | LF | 38 | -1.65 | 0.18 |
| 390 | ♂ | HF | 38 | -1.28 | 0.13 |
| 391 | ♂ | LF | 38 | -1.24 | 0.21 |
| 392 | ♂ | HF | 38 | -1.03 | 0.16 |
| 393 | ♀ | LF | 38 | -0.95 | 0.18 |
| 394 | ♀ | LF | 38 | -0.76 | 0.30 |
| 395 | ♀ | LF | 38 | -0.74 | 0.22 |
| 396 | ♂ | HF | 38 | -0.64 | 0.21 |
| 397 | ♀ | LF | 38 | -0.61 | 0.21 |
| 398 | ♂ | HF | 38 | -0.51 | 0.21 |
| 399 | ♂ | LF | 38 | -0.51 | 0.14 |
| 400 | ♂ | HF | 38 | -0.41 | 0.22 |
| 401 | ♂ | LF | 38 | -0.24 | 0.18 |
| 402 | ♀ | HF | 38 | 0.00  | 0.26 |
| 403 | ♀ | LF | 38 | 0.44  | 0.25 |
| 404 | ♀ | HF | 38 | 0.48  | 0.28 |
| 405 | ♂ | HF | 38 | 0.81  | 0.20 |
| 406 | ♂ | LF | 38 | 0.83  | 0.17 |
| 407 | ♀ | HF | 38 | 0.95  | 0.33 |
| 408 | ♀ | LF | 38 | 1.11  | 0.27 |
| 409 | ♀ | LF | 45 | -5.40 | 0.24 |
| 410 | ♀ | HF | 45 | -5.32 | 0.26 |
| 411 | ♀ | HF | 45 | -1.70 | 0.29 |
| 412 | ♀ | LF | 45 | -1.20 | 0.22 |
| 413 | ♀ | LF | 45 | -0.41 | 0.28 |
| 414 | ♀ | LF | 45 | -0.31 | 0.28 |
| 415 | ♀ | HF | 45 | 1.53  | 0.30 |
| 416 | ♀ | LF | 45 | 1.54  | 0.33 |

|     |   |    |    |       |      |
|-----|---|----|----|-------|------|
| 417 | ♂ | HF | 45 | 1.97  | 0.32 |
| 418 | ♀ | HF | 45 | 1.98  | 0.27 |
| 419 | ♂ | LF | 45 | 2.05  | 0.29 |
| 420 | ♂ | LF | 45 | 2.13  | 0.34 |
| 421 | ♂ | HF | 45 | 2.92  | 0.31 |
| 422 | ♂ | HF | 45 | 3.27  | 0.29 |
| 423 | ♂ | LF | 45 | 3.34  | 0.32 |
| 424 | ♀ | HF | 45 | 3.79  | 0.34 |
| 425 | ♀ | HF | 46 | -6.92 | 0.19 |
| 426 | ♂ | LF | 46 | -4.20 | 0.17 |
| 427 | ♀ | LF | 46 | -3.88 | 0.16 |
| 428 | ♀ | LF | 46 | -2.90 | 0.13 |
| 429 | ♀ | LF | 46 | -2.04 | 0.21 |
| 430 | ♀ | HF | 46 | -1.53 | 0.14 |
| 431 | ♂ | HF | 46 | -1.33 | 0.18 |
| 432 | ♂ | HF | 46 | -0.57 | 0.27 |
| 433 | ♀ | LF | 46 | -0.56 | 0.19 |
| 434 | ♂ | LF | 46 | -0.44 | 0.17 |
| 435 | ♀ | LF | 46 | -0.32 | 0.25 |
| 436 | ♀ | HF | 46 | -0.29 | 0.19 |
| 437 | ♂ | HF | 46 | -0.28 | 0.18 |
| 438 | ♀ | LF | 46 | 0.02  | 0.22 |
| 439 | ♀ | LF | 46 | 0.05  | 0.26 |
| 440 | ♂ | LF | 46 | 0.09  | 0.19 |
| 441 | ♂ | LF | 46 | 0.17  | 0.23 |
| 442 | ♀ | LF | 46 | 0.46  | 0.23 |
| 443 | ♀ | HF | 46 | 0.56  | 0.31 |
| 444 | ♂ | HF | 46 | 0.93  | 0.17 |
| 445 | ♂ | LF | 46 | 1.28  | 0.30 |
| 446 | ♂ | HF | 46 | 1.44  | 0.29 |
| 447 | ♂ | LF | 46 | 1.54  | 0.26 |
| 448 | ♂ | HF | 46 | 1.55  | 0.33 |
| 449 | ♂ | LF | 46 | 1.55  | 0.28 |
| 450 | ♂ | LF | 46 | 1.68  | 0.28 |
| 451 | ♀ | HF | 46 | 3.17  | 0.34 |
| 452 | ♀ | LF | 48 | -5.10 | 0.16 |
| 453 | ♀ | HF | 48 | -4.85 | 0.20 |
| 454 | ♀ | LF | 48 | -3.12 | 0.17 |
| 455 | ♂ | LF | 48 | -2.75 | 0.16 |
| 456 | ♀ | LF | 48 | -1.33 | 0.16 |
| 457 | ♀ | LF | 48 | -1.17 | 0.18 |
| 458 | ♂ | LF | 48 | -1.04 | 0.18 |

|     |   |    |    |       |      |
|-----|---|----|----|-------|------|
| 459 | ♂ | LF | 48 | -0.65 | 0.25 |
| 460 | ♂ | LF | 48 | -0.43 | 0.20 |
| 461 | ♀ | HF | 48 | -0.08 | 0.31 |
| 462 | ♀ | LF | 48 | 0.04  | 0.25 |
| 463 | ♀ | LF | 48 | 0.50  | 0.29 |
| 464 | ♂ | LF | 48 | 0.53  | 0.21 |
| 465 | ♀ | LF | 48 | 0.55  | 0.26 |
| 466 | ♀ | LF | 48 | 0.64  | 0.23 |
| 467 | ♀ | LF | 48 | 0.66  | 0.31 |
| 468 | ♂ | LF | 48 | 1.24  | 0.30 |
| 469 | ♀ | HF | 48 | 2.12  | 0.39 |
| 470 | ♂ | HF | 48 | 2.97  | 0.35 |
| 471 | ♀ | HF | 48 | 3.17  | 0.41 |
| 472 | ♂ | HF | 48 | 3.43  | 0.40 |
| 473 | ♂ | HF | 48 | 3.57  | 0.45 |
| 474 | ♂ | HF | 48 | 3.98  | 0.46 |
| 475 | ♂ | HF | 48 | 4.14  | 0.41 |
| 476 | ♂ | HF | 48 | 5.94  | 0.46 |
| 477 | ♀ | HF | 48 | 5.95  | 0.43 |
| 478 | ♀ | HF | 48 | 6.23  | 0.48 |
| 479 | ♂ | HF | 48 | 6.78  | 0.50 |

---

♀ = female, ♂ = male, HF = high fat diet, LF = low fat diet, Fattiness = residuals of liver fat mass regressed onto lean mass, Fat Content = ratio of liver fat mass to total liver mass. Strain numbers are prefaced by LGXSM-, except strains Large (LG/J) and Small (SM/J).

**Table S3 SNP genotypes by strain and chromosome (CHR).**

| CHR | SNP                | SM/J | LG/J | 4  | 5  | 10 | 15 | 18 | 19 | 20 |
|-----|--------------------|------|------|----|----|----|----|----|----|----|
| 1   | rs3683945          | SS   | LL   | LL | SS | LL | LL | LL | SS | LL |
| 1   | rs13475748         | SS   | LL   | LL | SS | LL | LL | LL | LL | LL |
| 1   | rs13475774         | SS   | LL   | LL | LL | LL | LL | LL | LL | LL |
| 1   | rs13475816         | SS   | LL   | LL | LL | LL | LL | LL | LL | LL |
| 1   | rs3685569          | SS   | LL   | LL | LL | LL | LL | LL | LL | LL |
| 1   | gnf01.037.906      | SS   | LL   | LL | LL | SS | LL | LL | LL | LL |
| 1   | rs3663706          | SS   | LL   | LL | SS | SS | LL | LL | LL | LL |
| 1   | rs13475837         | SS   | LL   | LL | LL | SS | LL | LL | LL | LL |
| 1   | rs13475863         | SS   | LL   | LL | LL | SS | LL | LL | LL | LL |
| 1   | rs13475874         | SS   | LL   | LL | LL | SS | LL | LL | LL | LL |
| 1   | petAF067836-350A-1 | SS   | LL   | LL | LL | SS | LL | LL | LL | LL |
| 1   | rs13475894         | SS   | LL   | LL | LL | SS | LL | LL | LL | LL |
| 1   | rs13475902         | SS   | LL   | LL | LL | LL | LL | LL | LL | LL |
| 1   | rs13475903         | SS   | LL   | LL | LL | LL | LL | LL | LL | LL |
| 1   | rs13475931         | SS   | LL   | LL | LL | LL | LL | LL | LL | LL |
| 1   | rs3667200          | SS   | LL   | LL | LL | LL | LL | LL | LL | LL |
| 1   | rs13475970         | SS   | LL   | LL | LL | SS | LL | LL | LL | LL |
| 1   | rs3664800          | SS   | LL   | LL | LL | SS | LL | LL | LL | SS |
| 1   | rs6342650          | SS   | LL   | LL | LL | LL | LL | LL | LL | SS |
| 1   | rs13476036         | SS   | LL   | LL | LL | LL | LL | LL | LL | SS |
| 1   | mCV22824651        | SS   | LL   | LL | LL | LL | LL | SS | LL | SS |
| 1   | rs3719973          | SS   | LL   | LL | LL | LL | LL | SS | LL | SS |
| 1   | rs3686671          | SS   | LL   | LL | LL | LL | LL | LL | LL | LL |
| 1   | rs3691374          | SS   | LL   | LL | LL | LL | LL | LL | LL | LL |
| 1   | rs13476122         | SS   | LL   | LL | SS | LL | LL | LL | LL | LL |
| 1   | rs13476125         | SS   | LL   | NA | SS | LL | LL | LL | LL | LL |
| 1   | rs6250257          | SS   | LL   | NA | SS | LL | LL | LL | SS | LL |
| 1   | rs13476136         | SS   | LL   | NA | SS | LL | LL | LL | SS | LL |
| 1   | rs6186115          | SS   | LL   | NA | SS | LL | LL | LL | SS | LL |
| 1   | gnf01.157.188      | SS   | LL   | LL | SS | LL | LL | SS | SS | LL |
| 1   | rs13476211         | SS   | LL   | LL | SS | LL | LL | SS | SS | SS |
| 1   | rs8256589          | SS   | LL   | LL | SS | LL | LL | SS | SS | SS |
| 1   | rs8242852          | SS   | LL   | LL | SS | LL | LL | SS | SS | LL |
| 1   | rs13476248         | SS   | LL   | LL | SS | LL | LL | SS | SS | LL |
| 1   | rs3723788          | SS   | LL   | LL | LL | LL | LL | SS | SS | LL |
| 1   | mCV23509126        | SS   | LL   | LL | SS | LL | LL | SS | SS | LL |
| 1   | rs6157620          | SS   | LL   | LL | SS | LL | LL | SS | SS | LL |
| 1   | rs13476286         | SS   | LL   | LL | SS | LL | LL | SS | SS | SS |



|   |                |    |    |    |    |    |    |    |    |    |
|---|----------------|----|----|----|----|----|----|----|----|----|
| 1 | rs13476293     | SS | LL | SS | LL | LL | LL | SS | SS | SS |
| 1 | rs13476308     | SS | LL | SS | SS | LL | LL | SS | SS | SS |
| 2 | rs13476319     | SS | LL | SS | LL | LL | LL | LL | SS | SS |
| 2 | rs6359983      | SS | LL | SS | LL | LL | LL | LL | SS | SS |
| 2 | gnf02.007.482  | SS | LL | SS | LL | LL | LL | LL | LL | SS |
| 2 | rs3688854      | SS | LL | LL | SS | SS | LL | LL | LL | SS |
| 2 | mCV23209429    | SS | LL | LL | SS | SS | LL | SS | LL | SS |
| 2 | rs13476425     | SS | LL | LL | SS | SS | LL | SS | LL | SS |
| 2 | rs6313371      | SS | LL | LL | SS | SS | LL | SS | LL | SS |
| 2 | rs3680197      | SS | LL | LL | SS | SS | LL | SS | SS | SS |
| 2 | rs3718711      | SS | LL | LL | SS | SS | LL | SS | LL | SS |
| 2 | rs3022886      | SS | LL | LL | SS | SS | LL | LL | LL | SS |
| 2 | rs8263587      | SS | LL | LL | SS | LL | SS | LL | LL | SS |
| 2 | rs6295014      | SS | LL | LL | SS | LL | LL | LL | SS | SS |
| 2 | rs3710094      | SS | LL | LL | SS | LL | LL | LL | LL | SS |
| 2 | CEL-2_79237503 | SS | LL | LL | LL | LL | LL | LL | LL | SS |
| 2 | rs13476598     | SS | LL | LL | LL | LL | LL | LL | LL | SS |
| 2 | rs13476637     | SS | LL | LL | LL | LL | LL | LL | LL | SS |
| 2 | rs13476647     | SS | LL | LL | LL | LL | LL | LL | LL | SS |
| 2 | rs6406705      | SS | LL | LL | LL | LL | LL | LL | LL | SS |
| 2 | rs6208879      | SS | LL | LL | LL | LL | LL | LL | LL | SS |
| 2 | rs13476723     | SS | LL | LL | LL | LL | LL | LL | LL | SS |
| 2 | rs3725853      | SS | LL | LL | SS | LL | LL | LL | LL | SS |
| 2 | rs13476761     | SS | LL | LL | SS | LL | LL | LL | LL | SS |
| 2 | rs13476787     | SS | LL | LL | SS | LL | LL | LL | LL | SS |
| 2 | rs6249968      | SS | LL | LL | SS | LL | LL | LL | LL | SS |
| 2 | mCV23169908    | SS | LL | SS | SS | LL | LL | LL | LL | SS |
| 2 | rs3676033      | SS | LL | LL | SS | LL | LL | LL | LL | SS |
| 2 | rs13476846     | SS | LL | LL | LL | LL | LL | LL | LL | SS |
| 2 | rs6209403      | SS | LL | LL | LL | LL | LL | LL | LL | SS |
| 2 | rs6315439      | SS | LL | LL | LL | LL | LL | LL | LL | LL |
| 2 | rs13476860     | SS | LL | LL | LL | LL | LL | LL | LL | SS |
| 2 | gnf02.161.674  | SS | LL | LL | SS | LL | LL | LL | LL | SS |
| 2 | rs6204920      | SS | LL | LL | SS | LL | LL | LL | LL | SS |
| 2 | rs3673613      | SS | LL | LL | SS | LL | LL | LL | LL | SS |
| 2 | rs13476894     | SS | LL | LL | LL | LL | LL | LL | LL | SS |
| 2 | rs6160839      | SS | LL | LL | LL | LL | SS | LL | LL | SS |
| 2 | rs13476925     | SS | LL | SS | LL | LL | SS | LL | LL | SS |
| 2 | rs8238755      | SS | LL | SS | LL | LL | SS | LL | LL | SS |
| 2 | rs13476936     | SS | LL | LL | LL | LL | SS | LL | LL | SS |
| 3 | rs13476950     | SS | LL | LL | SS | LL | LL | SS | SS | SS |
| 3 | rs13477017     | SS | LL | LL | SS | SS | LL | SS | SS | SS |

|   |                 |    |    |    |    |    |    |    |    |    |
|---|-----------------|----|----|----|----|----|----|----|----|----|
| 3 | rs3677132       | SS | LL | LL | SS | SS | LL | LL | LL | SS |
| 3 | CEL-3_31146697  | SS | LL | LL | SS | SS | LL | SS | LL | LL |
| 3 | rs6351323       | SS | LL | LL | SS | SS | LL | SS | LL | LL |
| 3 | rs3720738       | SS | LL | LL | SS | LL | LL | SS | LL | LL |
| 3 | rs13477066      | SS | LL | LL | SS | SS | LL | SS | LL | LL |
| 3 | rs6335414       | SS | LL | SS | SS | SS | LL | SS | SS | LL |
| 3 | rs13477178      | SS | LL | SS | SS | SS | LL | SS | SS | LL |
| 3 | rs3659688       | SS | LL | SS | SS | SS | LL | SS | SS | LL |
| 3 | gnf03.073.308   | SS | LL | SS | SS | SS | LL | LL | SS | LL |
| 3 | rs3659866       | SS | LL | SS | SS | LL | LL | LL | SS | LL |
| 3 | rs13477230      | SS | LL | SS | SS | LL | LL | LL | SS | LL |
| 3 | rs6243021       | SS | LL | SS | SS | LL | LL | LL | SS | LL |
| 3 | rs13477242      | SS | LL | SS | SS | LL | LL | LL | SS | LL |
| 3 | rs13475064      | SS | LL | SS | SS | LL | LL | LL | SS | SS |
| 3 | rs13477254      | SS | LL | SS | SS | LL | LL | LL | LL | SS |
| 3 | rs13459185      | SS | LL | SS | SS | LL | LL | LL | LL | SS |
| 3 | rs3671622       | SS | LL | SS | SS | LL | SS | LL | LL | SS |
| 3 | rs8256683       | SS | LL | SS | LL | LL | SS | LL | LL | SS |
| 3 | gnf03.117.090   | SS | LL | LL | LL | LL | SS | LL | LL | SS |
| 3 | rs13477355      | SS | LL | SS | LL | LL | SS | LL | LL | SS |
| 3 | rs13477379      | SS | LL | SS | LL | LL | SS | LL | LL | SS |
| 3 | rs3707706       | SS | LL | SS | LL | LL | LL | LL | LL | SS |
| 3 | rs13477391      | SS | LL | SS | SS | LL | LL | LL | LL | SS |
| 3 | rs3658914       | SS | LL | SS | SS | SS | LL | LL | LL | SS |
| 3 | rs13477410      | SS | LL | SS | SS | SS | LL | LL | LL | SS |
| 3 | rs13477421      | SS | LL | SS | SS | LL | LL | LL | LL | SS |
| 3 | CEL-3_137067761 | SS | LL | SS | SS | LL | LL | LL | LL | SS |
| 3 | rs13477529      | SS | LL | SS | SS | LL | LL | LL | LL | SS |
| 3 | rs13477477      | SS | LL | SS | SS | LL | LL | LL | LL | SS |
| 3 | rs3695386       | SS | LL | SS | SS | LL | LL | LL | SS | SS |
| 4 | rs13477541      | SS | LL | LL | LL | SS | LL | SS | SS | SS |
| 4 | rs13477546      | SS | LL | SS | LL | SS | LL | SS | SS | SS |
| 4 | rs6324271       | SS | LL | SS | LL | SS | LL | SS | SS | SS |
| 4 | rs13477576      | SS | LL | SS | SS | SS | LL | SS | SS | SS |
| 4 | rs13477595      | SS | LL | SS | SS | LL | LL | SS | SS | SS |
| 4 | rs13477623      | SS | LL | SS | SS | SS | LL | SS | SS | SS |
| 4 | rs3719299       | SS | LL | SS | SS | SS | LL | SS | LL | SS |
| 4 | rs3684104       | SS | LL | LL | SS | SS | LL | SS | LL | SS |
| 4 | rs13477678      | SS | LL | LL | SS | SS | LL | SS | LL | LL |
| 4 | rs3707178       | SS | LL | LL | SS | SS | LL | SS | LL | LL |
| 4 | rs6269326       | SS | LL | LL | SS | SS | LL | SS | LL | LL |
| 4 | rs13477711      | SS | LL | LL | SS | SS | LL | SS | LL | LL |

|   |               |    |    |    |    |    |    |    |    |    |
|---|---------------|----|----|----|----|----|----|----|----|----|
| 4 | rs13477725    | SS | LL | LL | SS | SS | LL | SS | SS | LL |
| 4 | rs6370644     | SS | LL | SS | SS | SS | LL | SS | SS | LL |
| 4 | rs13477769    | SS | LL | SS | SS | SS | LL | SS | SS | LL |
| 4 | rs6255772     | SS | LL | SS | SS | SS | LL | LL | SS | LL |
| 4 | mCV22668736   | SS | LL | SS | SS | SS | LL | LL | SS | LL |
| 4 | rs3022993     | SS | LL | SS | SS | SS | LL | LL | SS | LL |
| 4 | rs3678308     | SS | LL | SS | SS | SS | LL | LL | SS | LL |
| 4 | rs13477968    | SS | LL | SS | SS | SS | LL | LL | SS | LL |
| 4 | rs4224808     | SS | LL | SS | SS | SS | LL | LL | SS | LL |
| 4 | rs3663950     | SS | LL | SS | SS | LL | LL | LL | SS | SS |
| 4 | rs3023025     | SS | LL | SS | SS | LL | LL | SS | SS | SS |
| 4 | rs4136314     | SS | LL | SS | SS | LL | LL | SS | SS | SS |
| 4 | rs3696703     | SS | LL | SS | SS | LL | LL | LL | SS | LL |
| 5 | rs13478093    | SS | LL | SS | LL | SS | LL | LL | SS | SS |
| 5 | rs3709946     | SS | LL | SS | LL | SS | LL | LL | SS | SS |
| 5 | rs3676096     | SS | LL | LL | LL | SS | LL | LL | SS | SS |
| 5 | rs3714258     | SS | LL | LL | LL | SS | LL | LL | SS | SS |
| 5 | rs13478133    | SS | LL | LL | LL | SS | LL | LL | LL | SS |
| 5 | rs13478148    | SS | LL | LL | LL | SS | LL | LL | LL | SS |
| 5 | rs13478204    | SS | LL | SS | SS | SS | LL | LL | LL | SS |
| 5 | rs13478217    | SS | LL | SS | SS | SS | LL | LL | LL | SS |
| 5 | rs6248036     | SS | LL | LL | SS | LL | LL | LL | LL | SS |
| 5 | rs3711950     | SS | LL | LL | SS | LL | LL | LL | LL | SS |
| 5 | rs6267669     | SS | LL | SS | SS | LL | LL | LL | LL | SS |
| 5 | rs3684754     | SS | LL | SS | SS | LL | LL | LL | LL | SS |
| 5 | rs6409508     | SS | LL | SS | SS | SS | LL | LL | LL | SS |
| 5 | gnf05.069.163 | SS | LL | SS | SS | SS | LL | LL | LL | SS |
| 5 | rs6221589     | SS | LL | SS | SS | SS | LL | SS | LL | SS |
| 5 | rs3658150     | SS | LL | SS | LL | SS | LL | SS | LL | SS |
| 5 | rs13478355    | SS | LL | SS | LL | SS | LL | SS | SS | SS |
| 5 | rs13478392    | SS | LL | SS | SS | SS | LL | SS | SS | SS |
| 5 | rs3661241     | SS | LL | SS | SS | SS | LL | SS | SS | SS |
| 5 | rs13478473    | SS | LL | SS | SS | SS | LL | SS | SS | SS |
| 5 | mCV22554962   | SS | LL | SS | SS | SS | LL | SS | SS | SS |
| 5 | rs3662655     | SS | LL | SS | SS | SS | LL | LL | SS | SS |
| 5 | rs13478509    | SS | LL | SS | LL | SS | LL | LL | SS | SS |
| 5 | rs3701266     | SS | LL | SS | LL | SS | LL | SS | SS | SS |
| 5 | rs13478522    | SS | LL | SS | LL | SS | LL | SS | SS | SS |
| 5 | rs6377710     | SS | LL | LL | LL | SS | LL | LL | SS | SS |
| 5 | rs13478540    | SS | LL | LL | LL | LL | LL | SS | SS | SS |
| 5 | rs3711751     | SS | LL | LL | LL | LL | LL | SS | SS | SS |
| 5 | rs3023061     | SS | LL | LL | LL | SS | SS | LL | LL | SS |

|   |                 |    |    |    |    |    |    |    |    |    |
|---|-----------------|----|----|----|----|----|----|----|----|----|
| 5 | mCV25009162     | SS | LL | LL | LL | SS | LL | LL | LL | SS |
| 5 | rs13478589      | SS | LL | LL | LL | SS | LL | SS | LL | SS |
| 5 | rs3718776       | SS | LL | LL | LL | SS | LL | SS | LL | SS |
| 6 | rs13478602      | SS | LL | SS | LL | LL | LL | SS | SS | LL |
| 6 | rs13478612      | SS | LL | SS | LL | LL | LL | SS | SS | LL |
| 6 | CEL-6_10519419  | SS | LL | SS | LL | LL | LL | SS | SS | SS |
| 6 | rs3678711       | SS | LL | SS | LL | LL | LL | SS | SS | SS |
| 6 | rs13478641      | SS | LL | SS | LL | LL | LL | SS | SS | SS |
| 6 | gnf06.016.989   | SS | LL | LL | LL | LL | LL | SS | SS | SS |
| 6 | rs3684494       | SS | LL | LL | LL | LL | LL | SS | SS | SS |
| 6 | rs13478676      | SS | LL | LL | LL | LL | LL | SS | SS | SS |
| 6 | rs13478681      | SS | LL | LL | LL | LL | LL | SS | LL | LL |
| 6 | rs6297560       | SS | LL | LL | LL | LL | LL | SS | LL | LL |
| 6 | gnf06.032.524   | SS | LL | LL | SS | LL | LL | SS | LL | LL |
| 6 | rs13478717      | SS | LL | LL | SS | LL | LL | SS | LL | LL |
| 6 | rs13478730      | SS | LL | LL | SS | LL | LL | SS | LL | SS |
| 6 | rs3684860       | SS | LL | LL | SS | LL | LL | SS | LL | LL |
| 6 | rs3023069       | SS | LL | SS | SS | SS | LL | SS | LL | SS |
| 6 | rs13478762      | SS | LL | SS | SS | SS | LL | SS | LL | SS |
| 6 | gnf06.058.959   | SS | LL | SS | SS | SS | LL | SS | LL | LL |
| 6 | rs13478818      | SS | LL | SS | SS | SS | LL | SS | LL | LL |
| 6 | rs6411497       | SS | LL | SS | SS | SS | LL | SS | LL | LL |
| 6 | rs13459097      | SS | LL | SS | SS | SS | SS | SS | LL | LL |
| 6 | rs3677567       | SS | LL | SS | SS | SS | SS | SS | LL | SS |
| 6 | rs6156752       | SS | LL | SS | LL | SS | SS | SS | LL | SS |
| 6 | rs6223362       | SS | LL | SS | LL | SS | SS | SS | LL | SS |
| 6 | gnf06.092.758   | SS | LL | SS | LL | SS | SS | SS | LL | SS |
| 6 | rs13478949      | SS | LL | SS | LL | LL | SS | SS | LL | LL |
| 6 | rs6204829       | SS | LL | SS | SS | LL | SS | SS | LL | LL |
| 6 | rs13478999      | SS | LL | SS | SS | LL | SS | SS | LL | LL |
| 6 | rs3722157       | SS | LL | SS | SS | LL | SS | SS | LL | LL |
| 6 | CEL-6_127435117 | SS | LL | SS | LL | LL | SS | SS | LL | LL |
| 6 | rs13479024      | SS | LL | SS | LL | LL | SS | SS | LL | LL |
| 6 | rs6387265       | SS | LL | LL | LL | LL | SS | SS | LL | LL |
| 7 | gnf07.010.101   | SS | LL | LL | SS | SS | LL | LL | LL | LL |
| 7 | UT_7_14.584506  | SS | LL | LL | SS | SS | LL | LL | LL | SS |
| 7 | rs13479154      | SS | LL | LL | SS | SS | LL | SS | LL | SS |
| 7 | rs13479171      | SS | LL | LL | SS | SS | LL | SS | LL | SS |
| 7 | rs3694031       | SS | LL | LL | LL | SS | LL | SS | LL | SS |
| 7 | rs6217275       | SS | LL | LL | LL | LL | LL | SS | LL | SS |
| 7 | gnf07.032.360   | SS | LL | LL | LL | LL | LL | SS | LL | SS |
| 7 | rs3717293       | SS | LL | LL | LL | LL | LL | SS | LL | SS |

|   |                 |    |    |    |    |    |    |    |    |    |
|---|-----------------|----|----|----|----|----|----|----|----|----|
| 7 | rs3679779       | SS | LL | LL | LL | LL | LL | SS | LL | SS |
| 7 | rs3667441       | SS | LL | SS | LL | LL | LL | SS | LL | SS |
| 7 | rs3723790       | SS | LL | SS | LL | LL | LL | SS | LL | SS |
| 7 | rs3676254       | SS | LL | SS | LL | LL | LL | SS | LL | SS |
| 7 | rs13479342      | SS | LL | SS | LL | LL | LL | LL | LL | SS |
| 7 | rs13479347      | SS | LL | SS | LL | LL | LL | LL | LL | SS |
| 7 | rs8248433       | SS | LL | SS | LL | LL | LL | LL | LL | LL |
| 7 | rs6213614       | SS | LL | SS | LL | LL | LL | LL | LL | LL |
| 7 | UT_7_90.803899  | SS | LL | SS | LL | LL | LL | LL | LL | LL |
| 7 | rs13479470      | SS | LL | SS | LL | LL | LL | LL | LL | LL |
| 7 | rs3656074       | SS | LL | SS | LL | LL | LL | LL | LL | LL |
| 7 | gnf07.120.460   | SS | LL | SS | LL | LL | LL | LL | SS | LL |
| 7 | CEL-7_116160192 | SS | LL | SS | LL | LL | LL | LL | SS | SS |
| 7 | rs8236684       | SS | LL | SS | LL | LL | SS | SS | SS | SS |
| 7 | CEL-7_126301023 | SS | LL | LL | LL | SS | LL | SS | SS | SS |
| 7 | rs6299045       | SS | LL | LL | LL | SS | LL | SS | SS | SS |
| 7 | rs3702894       | SS | LL | LL | LL | SS | LL | SS | LL | SS |
| 7 | rs6216320       | SS | LL | LL | LL | SS | LL | SS | LL | SS |
| 8 | rs6273176       | SS | LL | LL | LL | SS | LL | LL | LL | SS |
| 8 | rs13479601      | SS | LL | LL | LL | SS | LL | LL | LL | SS |
| 8 | rs6288205       | SS | LL | LL | LL | SS | LL | LL | LL | LL |
| 8 | rs13479628      | SS | LL | LL | LL | SS | LL | LL | SS | LL |
| 8 | CEL-8_25677705  | SS | LL | LL | SS | SS | LL | LL | SS | LL |
| 8 | rs13479769      | SS | LL | LL | SS | SS | SS | SS | SS | LL |
| 8 | rs13479784      | SS | LL | LL | LL | SS | SS | SS | SS | LL |
| 8 | rs3672639       | SS | LL | LL | LL | LL | SS | SS | SS | LL |
| 8 | rs6394046       | SS | LL | LL | LL | LL | SS | SS | SS | LL |
| 8 | rs13479873      | SS | LL | LL | LL | SS | SS | LL | SS | LL |
| 8 | rs13479879      | SS | LL | SS | LL | SS | SS | SS | SS | LL |
| 8 | rs3705695       | SS | LL | LL | SS | SS | SS | SS | SS | LL |
| 8 | rs6374927       | SS | LL | LL | SS | SS | SS | SS | SS | LL |
| 8 | rs3675125       | SS | LL | SS | SS | SS | SS | SS | SS | LL |
| 8 | rs8249856       | SS | LL | SS | SS | SS | SS | SS | SS | LL |
| 9 | rs13480065      | SS | LL | SS | SS | LL | LL | LL | SS | LL |
| 9 | rs13480112      | SS | LL | LL | SS | LL | LL | LL | SS | LL |
| 9 | rs6182405       | SS | LL | LL | SS | LL | LL | LL | SS | LL |
| 9 | petM-05537-1    | SS | LL | LL | SS | LL | LL | LL | LL | LL |
| 9 | CEL-9_29909656  | SS | LL | LL | SS | LL | LL | LL | LL | LL |
| 9 | rs13480130      | SS | LL | LL | LL | SS | LL | LL | LL | LL |
| 9 | rs3676086       | SS | LL | SS | LL | SS | LL | LL | LL | SS |
| 9 | rs13480166      | SS | LL | SS | LL | SS | LL | LL | SS | SS |
| 9 | gnf09.044.276   | SS | LL | SS | LL | SS | LL | SS | SS | SS |

|    |                    |    |    |    |    |    |    |    |    |    |
|----|--------------------|----|----|----|----|----|----|----|----|----|
| 9  | rs13480191         | SS | LL | SS | LL | LL | LL | SS | SS | SS |
| 9  | rs8259443          | SS | LL | SS | LL | LL | LL | SS | LL | SS |
| 9  | rs13480218         | SS | LL | SS | LL | LL | LL | SS | LL | SS |
| 9  | rs13480227         | SS | LL | SS | LL | LL | LL | LL | LL | SS |
| 9  | rs13480247         | SS | LL | SS | LL | LL | LL | LL | LL | SS |
| 9  | rs13480258         | SS | LL | SS | LL | LL | LL | LL | LL | LL |
| 9  | rs3703045          | SS | LL | LL | LL | LL | LL | LL | LL | LL |
| 9  | rs3724833          | SS | LL | LL | LL | LL | LL | LL | LL | LL |
| 9  | rs3670195          | SS | LL | LL | LL | SS | LL | LL | LL | LL |
| 9  | rs13480318         | SS | LL | LL | LL | SS | LL | LL | LL | LL |
| 9  | gnf09.087.298      | SS | LL | LL | LL | SS | LL | LL | LL | LL |
| 9  | rs13480387         | SS | LL | LL | LL | SS | LL | LL | LL | LL |
| 9  | rs3711089          | SS | LL | LL | LL | SS | LL | LL | LL | LL |
| 9  | rs6320810          | SS | LL | LL | LL | SS | LL | LL | LL | SS |
| 9  | rs3669563          | SS | LL | LL | LL | SS | SS | LL | LL | LL |
| 9  | rs13480454         | SS | LL | LL | LL | SS | SS | LL | SS | LL |
| 9  | rs6299531          | SS | LL | LL | LL | SS | SS | LL | SS | LL |
| 9  | rs8241505          | SS | LL | LL | LL | SS | SS | LL | LL | LL |
| 10 | rs13480510         | SS | LL | SS | LL | SS | LL | LL | LL | SS |
| 10 | rs13480516         | SS | LL | SS | LL | SS | LL | LL | LL | SS |
| 10 | rs13480527         | SS | LL | SS | LL | LL | LL | LL | LL | SS |
| 10 | rs3679120          | SS | LL | SS | LL | LL | LL | LL | LL | SS |
| 10 | rs13480547         | SS | LL | SS | LL | LL | LL | LL | LL | SS |
| 10 | rs13480601         | SS | LL | LL | SS | LL | LL | LL | LL | SS |
| 10 | rs3715820          | SS | LL | LL | LL | LL | LL | LL | LL | SS |
| 10 | rs6186864          | SS | LL | LL | LL | LL | LL | SS | LL | SS |
| 10 | rs13480630         | SS | LL | LL | LL | LL | LL | SS | LL | SS |
| 10 | rs13480638         | SS | LL | LL | LL | LL | LL | SS | LL | SS |
| 10 | rs13480652         | SS | LL | LL | LL | LL | LL | SS | LL | SS |
| 10 | rs13480678         | SS | LL | LL | LL | LL | LL | SS | LL | SS |
| 10 | mCV25373751        | SS | LL | LL | LL | LL | LL | SS | LL | SS |
| 10 | rs3661495          | SS | LL | SS | LL | LL | LL | SS | LL | SS |
| 10 | rs3704401          | SS | LL | SS | LL | LL | LL | SS | LL | SS |
| 10 | rs13480739         | SS | LL | LL | LL | LL | LL | SS | LL | SS |
| 10 | rs13480752         | SS | LL | LL | LL | LL | LL | SS | LL | SS |
| 10 | rs4228452          | SS | LL | LL | LL | LL | LL | SS | LL | SS |
| 10 | rs13480773         | SS | LL | SS | LL | LL | LL | SS | LL | SS |
| 10 | CZECH-10_116791624 | SS | LL | SS | LL | LL | SS | SS | LL | SS |
| 10 | rs6335076          | SS | LL | SS | LL | LL | LL | SS | LL | SS |
| 10 | rs6317716          | SS | LL | SS | LL | LL | LL | SS | LL | SS |
| 10 | rs13480808         | SS | LL | LL | LL | LL | LL | SS | LL | SS |
| 11 | rs13480835         | SS | LL | LL | LL | LL | LL | SS | LL | SS |

|    |                  |    |    |    |    |    |    |    |    |    |
|----|------------------|----|----|----|----|----|----|----|----|----|
| 11 | rs6393401        | SS | LL | LL | LL | LL | LL | SS | LL | SS |
| 11 | rs13480853       | SS | LL | LL | LL | LL | LL | LL | LL | SS |
| 11 | rs3689494        | SS | LL | LL | LL | LL | LL | LL | LL | SS |
| 11 | rs3658216        | SS | LL | LL | LL | LL | LL | LL | LL | SS |
| 11 | rs13480913       | SS | LL | LL | LL | LL | LL | LL | LL | SS |
| 11 | rs13480918       | SS | LL | LL | LL | SS | SS | LL | LL | SS |
| 11 | UT_11_29.443258  | SS | LL | LL | LL | SS | SS | LL | LL | SS |
| 11 | rs3690160        | SS | LL | LL | LL | SS | SS | LL | LL | SS |
| 11 | rs3660692        | SS | LL | LL | LL | SS | SS | LL | LL | SS |
| 11 | rs6326787        | SS | LL | SS | LL | SS | SS | LL | LL | SS |
| 11 | rs6199956        | SS | LL | SS | LL | SS | LL | LL | LL | SS |
| 11 | rs13481031       | SS | LL | SS | LL | SS | LL | LL | LL | SS |
| 11 | rs3684076        | SS | LL | SS | LL | SS | LL | LL | LL | SS |
| 11 | rs13481050       | SS | LL | SS | NA | SS | LL | LL | LL | SS |
| 11 | rs3714311        | SS | LL | LL | NA | SS | LL | SS | LL | SS |
| 11 | rs13481075       | SS | LL | LL | NA | LL | LL | SS | LL | SS |
| 11 | rs13481093       | SS | LL | LL | NA | LL | LL | SS | LL | SS |
| 11 | CEL-11_73459270  | SS | LL | LL | NA | LL | LL | SS | LL | SS |
| 11 | rs6178421        | SS | LL | LL | NA | LL | LL | SS | LL | SS |
| 11 | rs13481123       | SS | LL | LL | NA | LL | LL | SS | LL | SS |
| 11 | rs3661657        | SS | LL | LL | NA | LL | LL | SS | LL | SS |
| 11 | rs3688955        | SS | LL | LL | NA | LL | LL | SS | SS | LL |
| 11 | rs13481161       | SS | LL | LL | SS | SS | LL | SS | LL | LL |
| 11 | rs3686162        | SS | LL | LL | SS | SS | LL | SS | LL | LL |
| 11 | rs13474433       | SS | LL | LL | SS | SS | LL | SS | LL | LL |
| 11 | rs3695865        | SS | LL | LL | SS | SS | LL | SS | LL | LL |
| 11 | rs6180460        | SS | LL | LL | LL | SS | LL | SS | LL | LL |
| 11 | rs6407687        | SS | LL | LL | LL | SS | LL | SS | SS | LL |
| 11 | rs13481210       | SS | LL | LL | SS | SS | LL | SS | SS | LL |
| 11 | rs13481220       | SS | LL | LL | SS | SS | LL | SS | SS | LL |
| 11 | rs13481228       | SS | LL | LL | SS | SS | LL | SS | SS | SS |
| 11 | rs13481233       | SS | LL | LL | SS | SS | LL | SS | SS | SS |
| 11 | gnf11.121.400    | SS | LL | LL | SS | SS | LL | SS | SS | SS |
| 11 | rs3662930        | SS | LL | LL | SS | SS | LL | LL | SS | SS |
| 11 | gnf11.125.992    | SS | LL | LL | LL | SS | LL | LL | LL | SS |
| 11 | CEL-11_118234030 | SS | LL | LL | SS | SS | LL | LL | LL | SS |
| 12 | rs3699421        | SS | LL | LL | LL | LL | LL | LL | SS | LL |
| 12 | rs13481308       | SS | LL | LL | LL | LL | LL | SS | SS | LL |
| 12 | rs6328018        | SS | LL | LL | LL | LL | LL | LL | SS | LL |
| 12 | UT_12_24.561109  | SS | LL | LL | LL | LL | LL | LL | SS | SS |
| 12 | rs3695382        | SS | LL | LL | LL | LL | LL | LL | LL | SS |
| 12 | rs13481408       | SS | LL | LL | SS | LL | LL | LL | LL | SS |

|    |               |    |    |    |    |    |    |    |    |    |
|----|---------------|----|----|----|----|----|----|----|----|----|
| 12 | rs6317361     | SS | LL | LL | SS | LL | LL | LL | LL | LL |
| 12 | gnf12.053.286 | SS | LL | LL | SS | LL | LL | LL | LL | LL |
| 12 | rs3660822     | SS | LL | LL | SS | LL | LL | SS | LL | LL |
| 12 | rs6335879     | SS | LL | SS | SS | LL | LL | SS | LL | LL |
| 12 | rs3687032     | SS | LL | SS | SS | LL | LL | SS | LL | LL |
| 12 | rs3709008     | SS | LL | SS | SS | LL | LL | SS | LL | LL |
| 12 | rs3682382     | SS | LL | SS | SS | LL | LL | SS | LL | LL |
| 12 | rs3654718     | SS | LL | SS | SS | LL | LL | SS | LL | LL |
| 12 | rs13481561    | SS | LL | SS | SS | LL | LL | SS | LL | LL |
| 12 | rs6263380     | SS | LL | SS | SS | LL | LL | SS | LL | LL |
| 12 | rs13481571    | SS | LL | SS | LL | LL | LL | SS | LL | LL |
| 12 | rs3711162     | SS | LL | SS | LL | LL | LL | SS | LL | LL |
| 12 | rs6288403     | SS | LL | SS | LL | LL | LL | SS | LL | LL |
| 12 | rs13481592    | SS | LL | LL | SS | LL | LL | SS | LL | SS |
| 12 | rs3679514     | SS | LL | LL | SS | LL | LL | SS | LL | SS |
| 12 | rs13481618    | SS | LL | LL | SS | SS | LL | SS | LL | SS |
| 12 | rs13481632    | SS | LL | LL | SS | SS | LL | SS | LL | SS |
| 12 | rs13481641    | SS | LL | LL | SS | SS | LL | SS | SS | SS |
| 12 | rs13481651    | SS | LL | LL | SS | LL | LL | SS | SS | SS |
| 12 | rs4229612     | SS | LL | LL | LL | LL | LL | SS | SS | SS |
| 13 | rs6215262     | SS | LL | LL | NA | LL | SS | SS | SS | SS |
| 13 | rs13481702    | SS | LL | SS | NA | LL | SS | SS | SS | SS |
| 13 | rs13481706    | SS | LL | SS | NA | LL | SS | SS | SS | SS |
| 13 | rs3678616     | SS | LL | LL | NA | LL | SS | SS | SS | SS |
| 13 | gnf13.016.175 | SS | LL | SS | NA | LL | SS | SS | SS | SS |
| 13 | rs4229685     | SS | LL | SS | NA | LL | LL | SS | SS | LL |
| 13 | rs3724709     | SS | LL | SS | LL | SS | LL | SS | SS | LL |
| 13 | gnf13.038.133 | SS | LL | SS | LL | SS | LL | SS | SS | LL |
| 13 | rs6271232     | SS | LL | SS | LL | LL | LL | SS | SS | SS |
| 13 | rs3688207     | SS | LL | LL | LL | LL | LL | SS | SS | SS |
| 13 | rs13481823    | SS | LL | LL | LL | LL | LL | SS | SS | LL |
| 13 | gnf13.057.762 | SS | LL | LL | LL | LL | LL | SS | SS | LL |
| 13 | rs6410679     | SS | LL | LL | LL | LL | LL | SS | SS | LL |
| 13 | rs6381045     | SS | LL | LL | LL | LL | LL | SS | SS | SS |
| 13 | rs3721965     | SS | LL | LL | LL | LL | LL | SS | SS | LL |
| 13 | rs13481886    | SS | LL | LL | SS | LL | LL | SS | SS | LL |
| 13 | rs13481892    | SS | LL | LL | SS | LL | LL | SS | SS | LL |
| 13 | mCV24625340   | SS | LL | LL | SS | LL | LL | SS | SS | LL |
| 13 | gnf13.092.499 | SS | LL | LL | SS | LL | SS | SS | SS | LL |
| 13 | rs13481958    | SS | LL | LL | SS | LL | SS | SS | SS | SS |
| 13 | rs3688959     | SS | LL | LL | NA | LL | SS | SS | LL | SS |
| 13 | rs6389588     | SS | LL | LL | NA | LL | LL | SS | LL | SS |



|    |                  |    |    |    |    |    |    |    |    |    |
|----|------------------|----|----|----|----|----|----|----|----|----|
| 13 | rs13482000       | SS | LL | SS | LL | LL | LL | SS | SS | SS |
| 13 | mCV24886326      | SS | LL | LL | LL | SS | LL | SS | SS | SS |
| 13 | rs6247696        | SS | LL | LL | LL | LL | LL | SS | LL | SS |
| 13 | rs6397687        | SS | LL | LL | LL | LL | LL | SS | LL | SS |
| 14 | rs3687889        | SS | LL | LL | LL | SS | LL | LL | SS | LL |
| 14 | rs6397486        | SS | LL | LL | LL | LL | LL | LL | SS | LL |
| 14 | mCV23128760      | SS | LL | LL | LL | LL | LL | LL | SS | LL |
| 14 | rs3701623        | SS | LL | SS | LL | LL | LL | SS | LL | LL |
| 14 | rs13482262       | SS | LL | SS | LL | LL | LL | SS | LL | LL |
| 14 | rs6352085        | SS | LL | SS | LL | LL | LL | SS | LL | SS |
| 14 | rs13482276       | SS | LL | SS | LL | LL | LL | SS | LL | SS |
| 14 | rs13482281       | SS | LL | SS | LL | LL | LL | SS | SS | SS |
| 14 | rs13482296       | SS | LL | SS | LL | LL | LL | SS | SS | SS |
| 14 | rs6211694        | SS | LL | SS | LL | SS | LL | SS | SS | LL |
| 14 | CEL-14_110783830 | SS | LL | SS | LL | SS | LL | SS | SS | SS |
| 14 | rs3707842        | SS | LL | SS | LL | SS | LL | SS | SS | LL |
| 14 | gnf14.117.278    | SS | LL | SS | LL | SS | LL | LL | SS | LL |
| 14 | rs13482416       | SS | LL | SS | LL | LL | LL | LL | SS | LL |
| 15 | rs13459176       | SS | LL | LL | SS | LL | LL | LL | SS | LL |
| 15 | rs13482431       | SS | LL | LL | LL | LL | LL | LL | SS | LL |
| 15 | rs13482446       | SS | LL | LL | LL | LL | SS | LL | SS | LL |
| 15 | CEL-15_15919629  | SS | LL | LL | LL | LL | SS | LL | SS | LL |
| 15 | rs13482461       | SS | LL | LL | LL | LL | SS | LL | SS | LL |
| 15 | rs13482486       | SS | LL | SS | LL | LL | SS | LL | SS | LL |
| 15 | rs3670581        | SS | LL | SS | LL | LL | SS | LL | SS | LL |
| 15 | rs13482498       | SS | LL | SS | LL | SS | SS | LL | SS | LL |
| 15 | rs3088525        | SS | LL | SS | LL | SS | SS | SS | SS | LL |
| 15 | rs6188239        | SS | LL | SS | LL | SS | SS | SS | SS | LL |
| 15 | rs3695416        | SS | LL | SS | LL | SS | SS | SS | SS | LL |
| 15 | rs3677296        | SS | LL | SS | LL | SS | SS | LL | SS | LL |
| 15 | rs13482536       | SS | LL | SS | LL | SS | SS | LL | SS | LL |
| 15 | rs13482541       | SS | LL | SS | LL | SS | SS | LL | SS | LL |
| 15 | rs3660290        | SS | LL | LL | LL | SS | SS | LL | SS | SS |
| 15 | rs13482589       | SS | LL | LL | LL | SS | SS | LL | SS | SS |
| 15 | rs13482595       | SS | LL | SS | LL | SS | SS | LL | SS | SS |
| 15 | rs13482612       | SS | LL | SS | LL | SS | SS | LL | LL | SS |
| 15 | rs13482618       | SS | LL | LL | LL | SS | SS | LL | LL | SS |
| 15 | rs6197332        | SS | LL | SS | LL | SS | SS | LL | LL | SS |
| 15 | rs13482642       | SS | LL | SS | LL | SS | SS | LL | LL | SS |
| 15 | rs6287697        | SS | LL | SS | LL | SS | SS | LL | LL | SS |
| 15 | rs13482711       | SS | LL | SS | LL | SS | SS | LL | LL | SS |
| 15 | rs13482719       | SS | LL | SS | LL | SS | LL | LL | LL | SS |

|    |               |    |    |    |    |    |    |    |    |    |
|----|---------------|----|----|----|----|----|----|----|----|----|
| 15 | rs13482726    | SS | LL | SS | LL | SS | LL | LL | LL | LL |
| 15 | rs13482732    | SS | LL | SS | LL | SS | SS | LL | LL | LL |
| 15 | rs3708604     | SS | LL | SS | LL | SS | SS | LL | LL | LL |
| 15 | rs13482741    | SS | LL | SS | LL | SS | SS | LL | LL | LL |
| 16 | rs4152386     | SS | LL | SS | SS | LL | LL | LL | SS | SS |
| 16 | rs4165119     | SS | LL | LL | SS | LL | LL | LL | LL | SS |
| 16 | rs6294027     | SS | LL | SS | SS | LL | LL | LL | LL | SS |
| 16 | rs4172338     | SS | LL | SS | SS | LL | LL | LL | LL | SS |
| 16 | rs4173709     | SS | LL | SS | SS | LL | SS | LL | LL | SS |
| 16 | rs4175608     | SS | LL | LL | SS | LL | SS | LL | LL | SS |
| 16 | rs4177203     | SS | LL | LL | SS | SS | SS | LL | LL | SS |
| 16 | rs4179117     | SS | LL | LL | SS | SS | SS | LL | SS | SS |
| 16 | rs4184315     | SS | LL | LL | LL | SS | SS | LL | SS | SS |
| 16 | rs4185176     | SS | LL | LL | LL | SS | SS | SS | SS | SS |
| 16 | rs6271301     | SS | LL | LL | SS | SS | SS | SS | SS | SS |
| 16 | rs4192132     | SS | LL | LL | SS | SS | SS | SS | SS | SS |
| 16 | rs4197416     | SS | LL | LL | SS | SS | SS | LL | SS | SS |
| 16 | rs4197725     | SS | LL | LL | SS | SS | SS | SS | SS | SS |
| 16 | rs4202372     | SS | LL | LL | SS | SS | SS | LL | SS | SS |
| 16 | rs4203891     | SS | LL | LL | SS | SS | SS | LL | SS | SS |
| 16 | rs4205524     | SS | LL | LL | SS | SS | SS | SS | SS | SS |
| 16 | rs4211515     | SS | LL | NA | SS | LL | SS | SS | SS | SS |
| 16 | rs4211731     | SS | LL | NA | SS | LL | SS | SS | SS | SS |
| 16 | rs4219239     | SS | LL | SS | SS | LL | LL | LL | SS | SS |
| 16 | rs4219897     | SS | LL | SS | SS | LL | LL | LL | SS | SS |
| 17 | rs3724616     | SS | LL | SS | LL | SS | LL | LL | SS | SS |
| 17 | rs3702484     | SS | LL | SS | LL | SS | LL | LL | SS | LL |
| 17 | rs4231344     | SS | LL | LL | SS | SS | LL | SS | SS | LL |
| 17 | rs3090500     | SS | LL | LL | SS | SS | LL | SS | SS | LL |
| 17 | rs4136360     | SS | LL | LL | SS | SS | LL | SS | SS | LL |
| 17 | rs6358703     | SS | LL | LL | SS | SS | LL | SS | SS | LL |
| 17 | rs13482947    | SS | LL | LL | LL | SS | LL | SS | SS | SS |
| 17 | gnf17.035.152 | SS | LL | LL | LL | SS | LL | LL | SS | SS |
| 17 | rs13482968    | SS | LL | LL | LL | SS | LL | LL | SS | SS |
| 17 | rs13482973    | SS | LL | SS | LL | SS | LL | LL | SS | SS |
| 17 | rs3090988     | SS | LL | SS | LL | SS | LL | LL | SS | SS |
| 17 | mCV22888090   | SS | LL | LL | LL | LL | LL | SS | SS | SS |
| 17 | rs13483075    | SS | LL | LL | LL | LL | LL | SS | SS | SS |
| 17 | rs6322076     | SS | LL | LL | LL | LL | SS | SS | SS | SS |
| 17 | rs6386440     | SS | LL | LL | LL | LL | SS | SS | SS | SS |
| 17 | rs3684732     | SS | LL | LL | SS | LL | SS | SS | SS | SS |
| 17 | rs3701338     | SS | LL | LL | SS | LL | SS | SS | SS | SS |

|    |                 |    |    |    |    |    |    |    |    |    |
|----|-----------------|----|----|----|----|----|----|----|----|----|
| 17 | rs13483144      | SS | LL | LL | SS | LL | SS | LL | SS | SS |
| 18 | rs13483183      | SS | LL | LL | LL | SS | SS | SS | LL | LL |
| 18 | rs13483200      | SS | LL | LL | LL | SS | SS | SS | LL | LL |
| 18 | rs13483210      | SS | LL | LL | LL | SS | SS | SS | LL | SS |
| 18 | mCV23617245     | SS | LL | LL | LL | SS | SS | SS | LL | SS |
| 18 | rs6194744       | SS | LL | LL | LL | SS | LL | SS | LL | SS |
| 18 | rs13483262      | SS | LL | LL | LL | SS | LL | SS | LL | SS |
| 18 | rs13483277      | SS | LL | SS | LL | SS | LL | SS | LL | SS |
| 18 | CEL-18_32158369 | SS | LL | SS | LL | SS | LL | SS | SS | SS |
| 18 | rs3675531       | SS | LL | SS | LL | SS | SS | SS | SS | LL |
| 18 | gnf18.033.953   | SS | LL | SS | SS | SS | SS | SS | SS | SS |
| 18 | rs13483319      | SS | LL | SS | SS | SS | SS | SS | SS | SS |
| 18 | rs6313313       | SS | LL | SS | SS | SS | SS | SS | SS | SS |
| 18 | rs3676196       | SS | LL | SS | SS | SS | SS | SS | SS | SS |
| 18 | rs13483340      | SS | LL | SS | SS | LL | SS | SS | SS | SS |
| 18 | rs6184541       | SS | LL | SS | SS | LL | LL | SS | SS | SS |
| 18 | rs3654438       | SS | LL | LL | SS | SS | LL | SS | SS | SS |
| 18 | rs3688789       | SS | LL | LL | SS | SS | LL | SS | SS | SS |
| 18 | rs3716803       | SS | LL | LL | SS | SS | LL | SS | SS | SS |
| 18 | rs13483423      | SS | LL | LL | SS | SS | LL | SS | SS | SS |
| 18 | gnf18.069.928   | SS | LL | LL | SS | SS | LL | SS | SS | SS |
| 18 | rs6302629       | SS | LL | LL | LL | SS | LL | SS | SS | SS |
| 18 | rs3705890       | SS | LL | SS | LL | SS | LL | SS | SS | SS |
| 18 | rs3671707       | SS | LL | SS | LL | SS | LL | SS | SS | SS |
| 18 | rs13483466      | SS | LL | SS | LL | SS | LL | SS | SS | SS |
| 19 | rs3713033       | SS | LL | SS | SS | LL | SS | SS | LL | LL |
| 19 | rs13483526      | SS | LL | SS | LL | LL | SS | SS | LL | LL |
| 19 | rs6316813       | SS | LL | SS | LL | LL | SS | SS | LL | LL |
| 19 | rs6307076       | SS | LL | SS | LL | LL | SS | LL | LL | LL |
| 19 | rs6342493       | SS | LL | LL | SS | LL | SS | SS | LL | SS |
| 19 | rs6291559       | SS | LL | LL | SS | LL | SS | SS | LL | SS |
| 19 | rs3714482       | SS | LL | LL | SS | LL | LL | SS | LL | SS |
| 19 | CEL-19_32349880 | SS | LL | LL | SS | LL | SS | SS | LL | SS |
| 19 | rs13483650      | SS | LL | LL | LL | SS | SS | SS | LL | SS |
| 19 | CEL-19_48242857 | SS | LL | LL | LL | SS | SS | SS | LL | SS |
| 19 | rs13483677      | SS | LL | SS | LL | SS | SS | SS | LL | SS |
| 19 | rs3711945       | SS | LL | SS | SS | SS | SS | SS | LL | SS |
| X  | rs13483712      | SS | LL | SS | SS | LL | LL | LL | LL | SS |
| X  | rs13483724      | SS | LL | LL | LL | LL | LL | LL | LL | SS |
| X  | rs13483777      | SS | LL | LL | LL | LL | LL | LL | LL | LL |
| X  | rs13483884      | SS | LL | LL | LL | LL | LL | SS | LL | LL |
| X  | rs13483899      | SS | LL | SS | LL | LL | LL | SS | LL | LL |

|   |                 |    |    |    |    |    |    |    |    |    |
|---|-----------------|----|----|----|----|----|----|----|----|----|
| X | gnfX.084.751    | SS | LL | LL | LL | LL | LL | SS | LL | LL |
| X | gnfX.086.039    | SS | LL | LL | LL | LL | LL | SS | SS | LL |
| X | rs13483951      | SS | LL | LL | LL | LL | LL | SS | SS | LL |
| X | rs6205221       | SS | LL | LL | LL | LL | LL | SS | SS | LL |
| X | rs13484003      | SS | LL | LL | LL | LL | LL | SS | SS | LL |
| X | gnfX.118.600    | SS | LL | LL | LL | LL | LL | SS | LL | LL |
| X | rs13484038      | SS | LL | LL | LL | LL | LL | SS | LL | LL |
| X | gnfX.124.190    | SS | LL | LL | LL | LL | LL | SS | LL | LL |
| X | CEL-X_133525088 | SS | LL | LL | LL | LL | LL | SS | LL | LL |
| X | rs13484050      | SS | LL | LL | LL | LL | LL | LL | LL | LL |
| X | rs13484093      | SS | LL | LL | LL | LL | LL | LL | LL | LL |
| X | rs13484094      | SS | LL | LL | LL | LL | LL | LL | LL | LL |

---

| CHR | SNP                | 22 | 23 | 31 | 33 | 35 | 38 | 39 | 45 | 46 | 48 |
|-----|--------------------|----|----|----|----|----|----|----|----|----|----|
| 1   | rs3683945          | LL | SS | LL | LL | SS | LL | LL | SS | LL | LL |
| 1   | rs13475748         | LL | SS | LL | LL | SS | LL | LL | SS | LL | LL |
| 1   | rs13475774         | LL | SS | LL | LL | LL | LL | LL | SS | LL | LL |
| 1   | rs13475816         | LL | SS | LL | LL | LL | SS | SS | SS | LL | LL |
| 1   | rs3685569          | LL | SS | LL | LL | LL | SS | SS | SS | LL | SS |
| 1   | gnf01.037.906      | LL | SS | LL | LL | LL | SS | SS | SS | LL | LL |
| 1   | rs3663706          | LL | SS | LL | LL | SS | SS | SS | SS | LL | LL |
| 1   | rs13475837         | LL | SS | LL | LL | LL | SS | SS | SS | LL | LL |
| 1   | rs13475863         | LL | SS | LL | SS | LL | SS | SS | SS | LL | SS |
| 1   | rs13475874         | LL | SS | LL | SS | LL | SS | SS | SS | SS | SS |
| 1   | petAF067836-350A-1 | LL | LL | LL | SS | LL | SS | SS | SS | SS | SS |
| 1   | rs13475894         | LL | LL | LL | SS | LL | SS | LL | SS | LL | LL |
| 1   | rs13475902         | LL | LL | LL | SS | LL | SS | LL | SS | LL | LL |
| 1   | rs13475903         | LL | LL | LL | LL | LL | SS | LL | SS | LL | LL |
| 1   | rs13475931         | LL | LL | LL | SS | LL | SS | LL | SS | LL | LL |
| 1   | rs3667200          | LL | LL | LL | LL | LL | SS | LL | SS | LL | LL |
| 1   | rs13475970         | LL | LL | LL | LL | LL | SS | LL | SS | LL | LL |
| 1   | rs3664800          | LL | LL | LL | NA | LL | SS | LL | SS | LL | LL |
| 1   | rs6342650          | LL | LL | LL | NA | LL | SS | LL | SS | LL | LL |
| 1   | rs13476036         | LL | LL | LL | NA | LL | SS | LL | SS | LL | SS |
| 1   | mCV22824651        | LL | LL | LL | NA | LL | SS | LL | SS | LL | SS |
| 1   | rs3719973          | LL | LL | LL | NA | LL | SS | LL | SS | LL | LL |
| 1   | rs3686671          | LL | LL | LL | NA | LL | SS | LL | SS | LL | LL |
| 1   | rs3691374          | LL | LL | LL | SS | LL | SS | LL | SS | SS | LL |
| 1   | rs13476122         | LL | LL | LL | SS | LL | SS | LL | SS | LL | LL |
| 1   | rs13476125         | LL | LL | LL | SS | SS | SS | LL | SS | LL | SS |
| 1   | rs6250257          | LL | SS | LL | SS | SS | SS | LL | SS | LL | SS |
| 1   | rs13476136         | LL | SS | LL | SS | LL | SS | LL | SS | LL | SS |
| 1   | rs6186115          | LL | SS | LL | SS | LL | SS | LL | SS | LL | LL |
| 1   | gnf01.157.188      | LL | SS | LL | SS | LL | SS | LL | SS | LL | LL |
| 1   | rs13476211         | LL | LL | LL | SS | LL | SS | LL | SS | LL | SS |
| 1   | rs8256589          | LL | LL | LL | SS | LL | SS | LL | SS | SS | SS |
| 1   | rs8242852          | LL | LL | LL | LL | SS | LL | LL | SS | SS | SS |
| 1   | rs13476248         | LL | LL | LL | LL | SS | LL | LL | SS | SS | LL |
| 1   | rs3723788          | LL | LL | LL | LL | LL | LL | LL | SS | SS | LL |
| 1   | mCV23509126        | LL | LL | LL | LL | SS | LL | LL | SS | SS | LL |
| 1   | rs6157620          | LL | SS | LL | LL | SS | LL | LL | SS | SS | LL |
| 1   | rs13476286         | LL | SS | LL | LL | SS | LL | LL | SS | SS | LL |
| 1   | rs13476293         | LL | SS | LL | LL | SS | LL | LL | SS | SS | SS |

|   |                |    |    |    |    |    |    |    |    |    |    |
|---|----------------|----|----|----|----|----|----|----|----|----|----|
| 1 | rs13476308     | LL | SS | LL | LL | SS | LL | SS | SS | SS | SS |
| 2 | rs13476319     | SS | LL | LL | SS | LL | SS | SS | LL | LL | LL |
| 2 | rs6359983      | SS | LL | LL | SS | LL | SS | LL | LL | LL | LL |
| 2 | gnf02.007.482  | SS | LL | LL | SS | LL | SS | LL | LL | LL | LL |
| 2 | rs3688854      | SS | LL | LL | LL | SS | LL | SS | LL | LL | LL |
| 2 | mCV23209429    | SS | LL | LL | LL | SS | LL | SS | SS | LL | SS |
| 2 | rs13476425     | SS | LL | LL | SS | SS | LL | SS | SS | LL | SS |
| 2 | rs6313371      | SS | LL | LL | SS | SS | LL | LL | SS | LL | SS |
| 2 | rs3680197      | SS | LL | LL | SS | SS | LL | LL | SS | LL | SS |
| 2 | rs3718711      | LL | LL | LL | LL | SS | LL | LL | SS | LL | SS |
| 2 | rs3022886      | LL | LL | LL | LL | SS | LL | LL | SS | LL | SS |
| 2 | rs8263587      | LL | LL | SS | SS | SS | LL | SS | SS | LL | SS |
| 2 | rs6295014      | LL | LL | LL | NA | SS | LL | LL | LL | LL | SS |
| 2 | rs3710094      | LL | LL | LL | NA | SS | LL | LL | LL | LL | SS |
| 2 | CEL-2_79237503 | LL | LL | LL | NA | LL | LL | LL | LL | LL | SS |
| 2 | rs13476598     | SS | LL | LL | NA | LL | LL | LL | LL | LL | SS |
| 2 | rs13476637     | SS | LL | LL | NA | LL | LL | LL | LL | LL | LL |
| 2 | rs13476647     | SS | LL | LL | NA | LL | LL | LL | LL | LL | SS |
| 2 | rs6406705      | SS | LL | LL | NA | LL | LL | LL | LL | LL | SS |
| 2 | rs6208879      | SS | LL | LL | NA | LL | LL | LL | LL | LL | SS |
| 2 | rs13476723     | LL | LL | LL | NA | LL | LL | LL | LL | LL | SS |
| 2 | rs3725853      | LL | LL | LL | NA | SS | LL | LL | LL | LL | SS |
| 2 | rs13476761     | LL | LL | LL | SS | SS | SS | LL | LL | LL | SS |
| 2 | rs13476787     | LL | LL | LL | SS | SS | SS | SS | LL | LL | SS |
| 2 | rs6249968      | LL | LL | LL | SS | SS | SS | LL | LL | LL | SS |
| 2 | mCV23169908    | LL | LL | LL | SS | SS | SS | LL | LL | LL | SS |
| 2 | rs3676033      | LL | LL | LL | SS | SS | SS | SS | LL | LL | SS |
| 2 | rs13476846     | LL | LL | LL | SS | LL | SS | SS | LL | LL | SS |
| 2 | rs6209403      | LL | LL | LL | SS | LL | SS | LL | LL | LL | SS |
| 2 | rs6315439      | LL | LL | LL | LL | LL | LL | SS | LL | LL | LL |
| 2 | rs13476860     | LL | LL | LL | SS | LL | SS | SS | LL | LL | SS |
| 2 | gnf02.161.674  | LL | LL | LL | SS | SS | SS | SS | LL | LL | SS |
| 2 | rs6204920      | LL | LL | LL | SS | SS | SS | SS | SS | LL | SS |
| 2 | rs3673613      | LL | LL | LL | SS | SS | SS | SS | SS | LL | LL |
| 2 | rs13476894     | LL | LL | LL | SS | LL | SS | SS | SS | LL | LL |
| 2 | rs6160839      | LL | LL | SS | SS | LL | SS | SS | SS | SS | LL |
| 2 | rs13476925     | SS | LL | SS | SS | LL | SS | SS | SS | SS | LL |
| 2 | rs8238755      | SS | LL | SS | LL | LL | LL | SS | SS | SS | LL |
| 2 | rs13476936     | SS | LL | SS | LL | LL | LL | SS | SS | SS | LL |
| 3 | rs13476950     | LL | SS | LL | SS | SS | SS | SS | SS | SS | LL |
| 3 | rs13477017     | LL | SS | LL | SS | SS | SS | SS | SS | SS | LL |
| 3 | rs3677132      | LL | SS | LL | SS | SS | SS | SS | SS | SS | LL |

|   |                 |    |    |    |    |    |    |    |    |    |    |
|---|-----------------|----|----|----|----|----|----|----|----|----|----|
| 3 | CEL-3_31146697  | LL | SS | LL | SS | SS | SS | SS | SS | SS | SS |
| 3 | rs6351323       | LL | SS | LL | LL | SS | SS | SS | SS | SS | SS |
| 3 | rs3720738       | LL | SS | LL | LL | SS | SS | SS | SS | LL | SS |
| 3 | rs13477066      | LL | SS | LL | LL | SS | SS | SS | LL | LL | SS |
| 3 | rs6335414       | LL | SS | LL | LL | SS | SS | SS | LL | LL | LL |
| 3 | rs13477178      | LL | SS | LL | LL | SS | SS | SS | LL | LL | LL |
| 3 | rs3659688       | LL | SS | LL | LL | SS | SS | LL | LL | LL | LL |
| 3 | gnf03.073.308   | LL | SS | LL | LL | SS | SS | LL | LL | LL | LL |
| 3 | rs3659866       | LL | SS | LL | LL | SS | SS | LL | LL | LL | LL |
| 3 | rs13477230      | LL | SS | LL | LL | SS | SS | LL | LL | SS | LL |
| 3 | rs6243021       | LL | SS | LL | SS | SS | SS | LL | LL | SS | LL |
| 3 | rs13477242      | SS | SS | LL | SS | SS | SS | LL | LL | SS | LL |
| 3 | rs13475064      | SS | LL | LL | SS | SS | SS | LL | LL | SS | LL |
| 3 | rs13477254      | SS | LL | LL | SS | SS | SS | LL | LL | SS | LL |
| 3 | rs13459185      | LL | LL | LL | SS | SS | SS | LL | LL | SS | SS |
| 3 | rs3671622       | LL | LL | SS | SS | SS | SS | LL | LL | SS | SS |
| 3 | rs8256683       | LL | LL | SS | SS | SS | SS | LL | LL | SS | SS |
| 3 | gnf03.117.090   | LL | LL | SS | SS | SS | SS | LL | LL | SS | SS |
| 3 | rs13477355      | LL | LL | SS | LL | SS | LL | LL | LL | SS | SS |
| 3 | rs13477379      | LL | LL | SS | LL | SS | LL | LL | LL | LL | LL |
| 3 | rs3707706       | LL | SS | LL | LL | SS | LL | LL | LL | LL | LL |
| 3 | rs13477391      | LL | SS | LL | LL | SS | LL | LL | LL | LL | LL |
| 3 | rs3658914       | LL | SS | LL | LL | SS | LL | LL | LL | LL | LL |
| 3 | rs13477410      | LL | SS | LL | SS | SS | SS | LL | LL | LL | LL |
| 3 | rs13477421      | LL | SS | LL | SS | SS | SS | LL | LL | LL | SS |
| 3 | CEL-3_137067761 | SS | SS | LL | SS | SS | SS | LL | LL | LL | SS |
| 3 | rs13477529      | SS | SS | LL | SS | SS | LL | LL | LL | LL | SS |
| 3 | rs13477477      | SS | SS | LL | SS | SS | LL | LL | LL | SS | SS |
| 3 | rs3695386       | SS | SS | LL | SS | SS | LL | LL | LL | SS | SS |
| 4 | rs13477541      | SS | SS | LL | SS | LL | SS | LL | LL | LL | LL |
| 4 | rs13477546      | SS | SS | LL | SS | LL | SS | LL | LL | LL | LL |
| 4 | rs6324271       | SS | SS | LL | SS | LL | SS | LL | SS | LL | LL |
| 4 | rs13477576      | SS | SS | LL | SS | SS | SS | LL | SS | LL | LL |
| 4 | rs13477595      | SS | SS | LL | SS | SS | SS | LL | SS | LL | SS |
| 4 | rs13477623      | SS | SS | LL | SS | SS | SS | LL | SS | LL | SS |
| 4 | rs3719299       | SS | SS | LL | SS | SS | SS | LL | SS | LL | SS |
| 4 | rs3684104       | SS | SS | LL | SS | SS | SS | LL | SS | LL | SS |
| 4 | rs13477678      | SS | SS | LL | SS | SS | SS | SS | SS | LL | SS |
| 4 | rs3707178       | SS | SS | LL | LL | SS | LL | SS | SS | LL | SS |
| 4 | rs6269326       | SS | SS | LL | LL | SS | LL | SS | SS | LL | LL |
| 4 | rs13477711      | SS | SS | LL | LL | SS | LL | SS | SS | LL | SS |
| 4 | rs13477725      | SS | SS | LL | LL | SS | LL | SS | SS | LL | SS |

|   |               |    |    |    |    |    |    |    |    |    |    |
|---|---------------|----|----|----|----|----|----|----|----|----|----|
| 4 | rs6370644     | SS | SS | LL | LL | SS | LL | SS | SS | LL | SS |
| 4 | rs13477769    | SS | SS | LL | SS | SS | SS | SS | SS | LL | SS |
| 4 | rs6255772     | SS | SS | LL | SS | SS | SS | SS | SS | LL | SS |
| 4 | mCV22668736   | LL | SS | LL | SS | SS | SS | SS | SS | LL | SS |
| 4 | rs3022993     | LL | SS | LL | LL | SS | SS | SS | SS | LL | LL |
| 4 | rs3678308     | LL | SS | LL | SS | SS | SS | SS | SS | SS | LL |
| 4 | rs13477968    | SS | SS | LL | LL | SS | SS | SS | SS | SS | LL |
| 4 | rs4224808     | SS | SS | LL | LL | SS | SS | SS | SS | SS | SS |
| 4 | rs3663950     | SS | LL | LL | LL | SS | SS | SS | SS | SS | SS |
| 4 | rs3023025     | SS | SS | LL | SS | SS | SS | LL | LL | SS | SS |
| 4 | rs4136314     | SS | LL | LL | SS | SS | SS | LL | LL | SS | SS |
| 4 | rs3696703     | SS | LL | LL | SS | SS | LL | LL | LL | LL | SS |
| 5 | rs13478093    | LL | LL | LL | SS | LL | SS | LL | SS | LL | LL |
| 5 | rs3709946     | LL | LL | LL | SS | LL | SS | LL | SS | SS | LL |
| 5 | rs3676096     | LL | LL | LL | SS | LL | SS | LL | SS | SS | LL |
| 5 | rs3714258     | LL | LL | LL | SS | LL | SS | LL | SS | LL | LL |
| 5 | rs13478133    | LL | LL | LL | SS | LL | SS | LL | SS | LL | SS |
| 5 | rs13478148    | LL | LL | LL | SS | LL | SS | LL | LL | LL | SS |
| 5 | rs13478204    | LL | LL | LL | SS | SS | SS | LL | LL | LL | SS |
| 5 | rs13478217    | SS | LL | LL | SS | SS | SS | LL | LL | SS | SS |
| 5 | rs6248036     | SS | SS | LL | SS | SS | SS | LL | LL | SS | SS |
| 5 | rs3711950     | LL | LL | LL | SS | SS | SS | LL | LL | SS | SS |
| 5 | rs6267669     | LL | LL | LL | SS | SS | SS | LL | LL | LL | SS |
| 5 | rs3684754     | LL | SS | LL | SS | SS | SS | LL | LL | LL | SS |
| 5 | rs6409508     | LL | SS | LL | SS | SS | SS | LL | LL | LL | SS |
| 5 | gnf05.069.163 | LL | LL | LL | SS | SS | SS | LL | LL | LL | SS |
| 5 | rs6221589     | LL | LL | LL | SS | SS | SS | LL | LL | LL | SS |
| 5 | rs3658150     | LL | LL | LL | SS | LL | SS | LL | LL | LL | SS |
| 5 | rs13478355    | LL | LL | LL | SS | LL | SS | LL | LL | LL | SS |
| 5 | rs13478392    | LL | LL | LL | SS | SS | SS | LL | LL | LL | SS |
| 5 | rs3661241     | LL | LL | LL | LL | SS | LL | LL | LL | LL | SS |
| 5 | rs13478473    | SS | LL | LL | LL | SS | LL | LL | LL | LL | SS |
| 5 | mCV22554962   | SS | LL | LL | SS | SS | SS | LL | LL | LL | SS |
| 5 | rs3662655     | SS | LL | LL | SS | SS | SS | LL | LL | LL | SS |
| 5 | rs13478509    | SS | LL | LL | SS | LL | SS | LL | LL | LL | SS |
| 5 | rs3701266     | SS | LL | LL | SS | LL | SS | LL | LL | LL | SS |
| 5 | rs13478522    | SS | LL | LL | SS | LL | SS | LL | LL | SS | SS |
| 5 | rs6377710     | SS | LL | LL | SS | LL | SS | LL | LL | SS | LL |
| 5 | rs13478540    | SS | LL | LL | LL | LL | LL | LL | LL | SS | LL |
| 5 | rs3711751     | SS | LL | LL | LL | LL | LL | LL | LL | LL | LL |
| 5 | rs3023061     | SS | LL | SS | LL | LL | LL | LL | LL | LL | LL |
| 5 | mCV25009162   | SS | LL | LL | LL | SS | LL | LL | LL | LL | LL |



|   |                 |    |    |    |    |    |    |    |    |    |    |
|---|-----------------|----|----|----|----|----|----|----|----|----|----|
| 5 | rs13478589      | SS | SS | LL | LL | SS | LL | SS | LL | LL | SS |
| 5 | rs3718776       | SS | SS | LL | LL | SS | LL | LL | LL | LL | SS |
| 6 | rs13478602      | SS | LL | LL | SS | LL | SS | SS | SS | LL | SS |
| 6 | rs13478612      | SS | LL | LL | SS | LL | SS | SS | SS | LL | NA |
| 6 | CEL-6_10519419  | SS | LL | LL | SS | LL | SS | SS | SS | LL | NA |
| 6 | rs3678711       | SS | LL | LL | SS | LL | SS | SS | LL | SS | NA |
| 6 | rs13478641      | SS | LL | LL | SS | LL | SS | SS | LL | SS | LL |
| 6 | gnf06.016.989   | SS | LL | LL | SS | LL | SS | SS | LL | SS | LL |
| 6 | rs3684494       | SS | LL | LL | SS | SS | SS | SS | LL | SS | LL |
| 6 | rs13478676      | SS | LL | LL | LL | SS | LL | SS | LL | SS | LL |
| 6 | rs13478681      | SS | LL | LL | LL | SS | LL | SS | LL | SS | LL |
| 6 | rs6297560       | SS | LL | LL | LL | LL | LL | SS | LL | SS | LL |
| 6 | gnf06.032.524   | SS | LL | LL | LL | SS | LL | SS | LL | SS | LL |
| 6 | rs13478717      | SS | LL | LL | LL | SS | LL | SS | LL | SS | SS |
| 6 | rs13478730      | SS | LL | LL | LL | SS | LL | SS | LL | SS | SS |
| 6 | rs3684860       | SS | LL | LL | LL | SS | LL | SS | LL | LL | SS |
| 6 | rs3023069       | SS | LL | LL | LL | SS | LL | SS | LL | LL | SS |
| 6 | rs13478762      | SS | LL | LL | LL | SS | LL | SS | LL | SS | SS |
| 6 | gnf06.058.959   | SS | LL | LL | LL | SS | LL | SS | LL | SS | SS |
| 6 | rs13478818      | SS | LL | LL | LL | SS | LL | SS | SS | LL | SS |
| 6 | rs6411497       | SS | SS | LL | LL | SS | LL | SS | SS | LL | SS |
| 6 | rs13459097      | SS | SS | SS | LL | SS | LL | SS | SS | LL | SS |
| 6 | rs3677567       | SS | SS | SS | LL | SS | LL | SS | SS | LL | SS |
| 6 | rs6156752       | SS | LL | SS | LL | LL | LL | SS | SS | LL | SS |
| 6 | rs6223362       | SS | LL | SS | LL | LL | SS | SS | SS | LL | SS |
| 6 | gnf06.092.758   | SS | LL | SS | LL | LL | SS | LL | SS | LL | SS |
| 6 | rs13478949      | SS | SS | SS | SS | LL | LL | SS | SS | LL | SS |
| 6 | rs6204829       | SS | SS | SS | SS | SS | LL | SS | SS | LL | SS |
| 6 | rs13478999      | SS | SS | SS | SS | SS | LL | SS | SS | LL | SS |
| 6 | rs3722157       | SS | SS | SS | LL | SS | LL | SS | SS | LL | SS |
| 6 | CEL-6_127435117 | SS | SS | SS | LL | LL | LL | SS | SS | LL | SS |
| 6 | rs13479024      | SS | SS | SS | LL | LL | LL | SS | SS | SS | SS |
| 6 | rs6387265       | SS | SS | SS | LL | LL | LL | SS | SS | SS | SS |
| 7 | gnf07.010.101   | SS | LL | LL | LL | LL | LL | SS | LL | SS | SS |
| 7 | UT_7_14.584506  | SS | LL | LL | LL | SS | LL | SS | LL | SS | SS |
| 7 | rs13479154      | SS | LL | LL | LL | SS | LL | SS | LL | SS | SS |
| 7 | rs13479171      | SS | LL | LL | LL | SS | LL | SS | LL | SS | LL |
| 7 | rs3694031       | SS | LL | LL | LL | LL | LL | SS | LL | SS | LL |
| 7 | rs6217275       | SS | LL | LL | LL | LL | LL | SS | LL | SS | LL |
| 7 | gnf07.032.360   | SS | LL | LL | LL | LL | LL | SS | LL | SS | LL |
| 7 | rs3717293       | SS | SS | LL | LL | LL | LL | SS | LL | SS | LL |
| 7 | rs3679779       | SS | SS | LL | LL | LL | LL | SS | LL | SS | LL |

|   |                 |    |    |    |    |    |    |    |    |    |    |
|---|-----------------|----|----|----|----|----|----|----|----|----|----|
| 7 | rs3667441       | SS | SS | LL | LL | LL | LL | SS | LL | SS | LL |
| 7 | rs3723790       | SS | SS | LL | LL | LL | LL | SS | LL | LL | LL |
| 7 | rs3676254       | SS | SS | LL | LL | LL | LL | SS | SS | LL | LL |
| 7 | rs13479342      | SS | SS | LL | LL | LL | LL | SS | SS | LL | LL |
| 7 | rs13479347      | SS | SS | LL | LL | LL | LL | LL | SS | LL | LL |
| 7 | rs8248433       | SS | SS | LL | LL | LL | LL | LL | SS | LL | LL |
| 7 | rs6213614       | SS | SS | LL | LL | LL | LL | SS | SS | LL | LL |
| 7 | UT_7_90.803899  | LL | SS | LL | LL | LL | LL | SS | SS | LL | LL |
| 7 | rs13479470      | LL | SS | LL | LL | LL | LL | SS | SS | LL | LL |
| 7 | rs3656074       | LL | SS | LL | SS | LL | SS | SS | SS | LL | LL |
| 7 | gnf07.120.460   | LL | SS | LL | SS | LL | SS | LL | SS | LL | LL |
| 7 | CEL-7_116160192 | LL | SS | LL | SS | LL | SS | LL | SS | LL | LL |
| 7 | rs8236684       | SS | SS | SS | SS | LL | SS | SS | SS | LL | LL |
| 7 | CEL-7_126301023 | SS | LL | LL | SS | LL | SS | SS | SS | SS | LL |
| 7 | rs6299045       | SS | LL | LL | SS | LL | SS | LL | SS | SS | LL |
| 7 | rs3702894       | SS | LL | LL | SS | LL | SS | LL | SS | SS | LL |
| 7 | rs6216320       | SS | SS | LL | SS | LL | SS | LL | SS | SS | LL |
| 8 | rs6273176       | LL | LL | LL | LL | SS | LL | SS | LL | LL | LL |
| 8 | rs13479601      | LL | LL | LL | LL | LL | LL | SS | LL | LL | LL |
| 8 | rs6288205       | LL | LL | LL | LL | LL | LL | SS | LL | LL | LL |
| 8 | rs13479628      | LL | LL | LL | LL | LL | LL | SS | LL | LL | LL |
| 8 | CEL-8_25677705  | SS | LL | LL | LL | SS | LL | SS | LL | LL | LL |
| 8 | rs13479769      | LL | LL | SS | LL | SS | LL | SS | LL | LL | LL |
| 8 | rs13479784      | LL | LL | SS | LL | LL | LL | SS | LL | LL | LL |
| 8 | rs3672639       | LL | SS | SS | LL | LL | LL | SS | LL | LL | LL |
| 8 | rs6394046       | LL | LL | SS | LL | LL | LL | SS | LL | LL | LL |
| 8 | rs13479873      | LL | LL | SS | LL | LL | LL | SS | LL | LL | SS |
| 8 | rs13479879      | LL | LL | SS | LL | LL | LL | SS | LL | LL | SS |
| 8 | rs3705695       | LL | LL | SS | SS | SS | SS | SS | LL | SS | SS |
| 8 | rs6374927       | SS | LL | SS | LL | SS | SS | SS | LL | SS | SS |
| 8 | rs3675125       | LL | LL | SS | SS | SS | SS | SS | LL | LL | LL |
| 8 | rs8249856       | LL | LL | SS | SS | SS | LL | SS | LL | LL | LL |
| 9 | rs13480065      | LL | SS | LL | LL | SS | LL | SS | SS | LL | SS |
| 9 | rs13480112      | SS | SS | LL | LL | SS | LL | LL | LL | LL | LL |
| 9 | rs6182405       | SS | SS | LL | LL | SS | LL | LL | LL | LL | SS |
| 9 | petM-05537-1    | SS | SS | LL | LL | SS | NA | LL | LL | LL | SS |
| 9 | CEL-9_29909656  | SS | SS | LL | LL | SS | NA | LL | LL | SS | SS |
| 9 | rs13480130      | SS | SS | LL | LL | LL | SS | LL | LL | SS | LL |
| 9 | rs3676086       | SS | SS | LL | LL | LL | LL | LL | LL | SS | LL |
| 9 | rs13480166      | SS | SS | LL | LL | LL | LL | LL | LL | SS | LL |
| 9 | gnf09.044.276   | SS | SS | LL | LL | LL | LL | LL | LL | SS | SS |
| 9 | rs13480191      | SS | SS | LL | LL | LL | SS | LL | LL | SS | SS |

|    |                    |    |    |    |    |    |    |    |    |    |    |
|----|--------------------|----|----|----|----|----|----|----|----|----|----|
| 9  | rs8259443          | SS | SS | LL | LL | LL | SS | LL | LL | SS | SS |
| 9  | rs13480218         | SS | SS | LL | LL | LL | LL | LL | LL | SS | SS |
| 9  | rs13480227         | SS | SS | LL | LL | LL | LL | LL | LL | SS | SS |
| 9  | rs13480247         | SS | SS | LL | SS | LL | LL | LL | LL | SS | SS |
| 9  | rs13480258         | SS | SS | LL | SS | LL | LL | LL | LL | SS | SS |
| 9  | rs3703045          | SS | SS | LL | SS | LL | LL | LL | SS | LL | SS |
| 9  | rs3724833          | SS | SS | LL | LL | LL | LL | LL | SS | LL | SS |
| 9  | rs3670195          | SS | SS | LL | LL | LL | LL | LL | SS | LL | SS |
| 9  | rs13480318         | SS | SS | LL | SS | LL | LL | SS | SS | LL | SS |
| 9  | gnf09.087.298      | SS | SS | LL | SS | LL | LL | LL | SS | LL | SS |
| 9  | rs13480387         | SS | SS | LL | SS | LL | LL | LL | SS | LL | SS |
| 9  | rs3711089          | SS | SS | LL | SS | LL | LL | LL | SS | LL | SS |
| 9  | rs6320810          | SS | LL | SS | SS | LL | LL | LL | LL | SS | SS |
| 9  | rs3669563          | SS | LL | SS | SS | LL | LL | LL | LL | SS | SS |
| 9  | rs13480454         | SS | LL | SS | SS | LL | LL | LL | LL | SS | SS |
| 9  | rs6299531          | SS | LL | SS | SS | LL | LL | LL | LL | LL | SS |
| 9  | rs8241505          | SS | LL | SS | SS | LL | LL | LL | LL | LL | SS |
| 10 | rs13480510         | LL | LL | LL | SS | LL | SS | SS | LL | LL | SS |
| 10 | rs13480516         | LL | LL | LL | SS | LL | SS | SS | LL | LL | SS |
| 10 | rs13480527         | LL | LL | LL | SS | LL | SS | SS | LL | LL | SS |
| 10 | rs3679120          | LL | SS | LL | SS | LL | SS | SS | LL | LL | SS |
| 10 | rs13480547         | LL | SS | LL | SS | LL | SS | SS | LL | LL | SS |
| 10 | rs13480601         | SS | SS | LL | LL | SS | LL | SS | LL | LL | SS |
| 10 | rs3715820          | SS | SS | LL | LL | LL | LL | SS | LL | LL | SS |
| 10 | rs6186864          | SS | SS | LL | LL | SS | LL | SS | LL | LL | SS |
| 10 | rs13480630         | LL | SS | LL | LL | SS | LL | SS | LL | LL | SS |
| 10 | rs13480638         | LL | SS | LL | LL | LL | LL | SS | LL | SS | SS |
| 10 | rs13480652         | LL | LL | LL | LL | LL | LL | SS | LL | SS | SS |
| 10 | rs13480678         | SS | LL | LL | LL | LL | LL | SS | SS | SS | SS |
| 10 | mCV25373751        | SS | LL | LL | LL | LL | LL | SS | SS | SS | LL |
| 10 | rs3661495          | SS | LL | LL | LL | LL | LL | SS | SS | SS | LL |
| 10 | rs3704401          | SS | SS | LL | LL | LL | LL | SS | SS | SS | LL |
| 10 | rs13480739         | SS | SS | LL | LL | LL | LL | SS | SS | SS | LL |
| 10 | rs13480752         | SS | SS | LL | SS | LL | SS | SS | SS | SS | LL |
| 10 | rs4228452          | SS | SS | LL | SS | LL | SS | SS | SS | SS | LL |
| 10 | rs13480773         | LL | SS | LL | SS | LL | SS | SS | SS | SS | LL |
| 10 | CZECH-10_116791624 | LL | SS | LL | SS | LL | SS | SS | SS | SS | LL |
| 10 | rs6335076          | LL | SS | LL | SS | LL | SS | SS | SS | SS | LL |
| 10 | rs6317716          | LL | SS | LL | SS | LL | SS | SS | LL | SS | LL |
| 10 | rs13480808         | LL | SS | LL | SS | LL | SS | LL | LL | LL | LL |
| 11 | rs13480835         | SS | LL | LL | LL | LL | LL | SS | LL | LL | SS |
| 11 | rs6393401          | LL | LL | LL | LL | LL | LL | SS | LL | LL | SS |

|    |                  |    |    |    |    |    |    |    |    |    |    |
|----|------------------|----|----|----|----|----|----|----|----|----|----|
| 11 | rs13480853       | LL | LL | LL | LL | LL | LL | SS | LL | SS | SS |
| 11 | rs3689494        | LL | LL | LL | LL | LL | LL | SS | LL | LL | SS |
| 11 | rs3658216        | LL | LL | LL | LL | LL | LL | SS | LL | SS | SS |
| 11 | rs13480913       | LL | LL | LL | LL | LL | LL | SS | LL | SS | SS |
| 11 | rs13480918       | LL | LL | SS | LL | LL | LL | SS | LL | SS | SS |
| 11 | UT_11_29.443258  | LL | LL | SS | SS | LL | LL | SS | LL | SS | SS |
| 11 | rs3690160        | LL | LL | SS | LL | LL | LL | SS | SS | LL | SS |
| 11 | rs3660692        | LL | LL | SS | SS | LL | SS | SS | SS | LL | SS |
| 11 | rs6326787        | LL | LL | SS | SS | LL | SS | SS | SS | LL | SS |
| 11 | rs6199956        | LL | LL | LL | SS | LL | SS | SS | SS | LL | SS |
| 11 | rs13481031       | LL | LL | LL | LL | LL | SS | SS | SS | LL | SS |
| 11 | rs3684076        | SS | LL | LL | LL | LL | SS | SS | SS | LL | SS |
| 11 | rs13481050       | SS | SS | LL | LL | SS | SS | SS | SS | LL | SS |
| 11 | rs3714311        | LL | SS | LL | LL | SS | SS | SS | LL | LL | SS |
| 11 | rs13481075       | LL | LL | LL | LL | SS | SS | SS | LL | LL | SS |
| 11 | rs13481093       | LL | LL | LL | LL | SS | SS | SS | SS | LL | SS |
| 11 | CEL-11_73459270  | LL | LL | LL | LL | SS | LL | SS | SS | LL | SS |
| 11 | rs6178421        | SS | LL | LL | LL | SS | LL | SS | SS | LL | SS |
| 11 | rs13481123       | SS | LL | LL | LL | SS | LL | SS | SS | LL | SS |
| 11 | rs3661657        | SS | LL | LL | LL | SS | LL | SS | SS | LL | SS |
| 11 | rs3688955        | SS | LL | LL | LL | SS | LL | SS | SS | LL | SS |
| 11 | rs13481161       | SS | LL | LL | LL | SS | LL | SS | SS | LL | SS |
| 11 | rs3686162        | SS | LL | LL | LL | SS | LL | SS | SS | LL | SS |
| 11 | rs13474433       | SS | LL | LL | SS | SS | LL | SS | SS | LL | SS |
| 11 | rs3695865        | SS | LL | LL | SS | SS | LL | SS | SS | LL | SS |
| 11 | rs6180460        | SS | LL | LL | SS | LL | LL | SS | SS | LL | SS |
| 11 | rs6407687        | SS | LL | LL | SS | LL | LL | SS | SS | LL | SS |
| 11 | rs13481210       | SS | LL | LL | SS | SS | LL | SS | SS | LL | SS |
| 11 | rs13481220       | SS | LL | LL | SS | SS | LL | SS | SS | SS | SS |
| 11 | rs13481228       | SS | LL | LL | SS | SS | SS | SS | SS | SS | SS |
| 11 | rs13481233       | SS | LL | LL | SS | SS | LL | SS | SS | SS | SS |
| 11 | gnf11.121.400    | LL | LL | LL | SS | SS | LL | SS | SS | LL | SS |
| 11 | rs3662930        | LL | LL | LL | SS | SS | LL | SS | SS | LL | SS |
| 11 | gnf11.125.992    | LL | LL | LL | SS | LL | LL | SS | SS | LL | SS |
| 11 | CEL-11_118234030 | LL | LL | LL | SS | SS | LL | SS | SS | LL | SS |
| 12 | rs3699421        | SS | SS | LL | LL | LL | LL | LL | LL | SS | SS |
| 12 | rs13481308       | SS | SS | LL | LL | LL | LL | LL | LL | SS | SS |
| 12 | rs6328018        | SS | SS | LL | LL | LL | LL | LL | LL | SS | SS |
| 12 | UT_12_24.561109  | SS | SS | LL | LL | LL | LL | LL | LL | SS | SS |
| 12 | rs3695382        | SS | SS | LL | LL | LL | LL | LL | LL | SS | SS |
| 12 | rs13481408       | SS | SS | LL | LL | SS | LL | LL | LL | SS | LL |
| 12 | rs6317361        | SS | SS | LL | LL | SS | LL | SS | SS | SS | LL |

|    |               |    |    |    |    |    |    |    |    |    |    |
|----|---------------|----|----|----|----|----|----|----|----|----|----|
| 12 | gnf12.053.286 | SS | SS | LL | LL | SS | SS | SS | SS | SS | LL |
| 12 | rs3660822     | SS | SS | LL | LL | SS | SS | SS | SS | SS | LL |
| 12 | rs6335879     | SS | SS | LL | LL | SS | SS | SS | SS | SS | LL |
| 12 | rs3687032     | SS | SS | LL | LL | SS | SS | SS | SS | LL | LL |
| 12 | rs3709008     | SS | SS | LL | LL | SS | SS | LL | SS | LL | LL |
| 12 | rs3682382     | SS | SS | LL | LL | SS | SS | LL | SS | LL | LL |
| 12 | rs3654718     | SS | LL | LL | LL | SS | SS | LL | SS | LL | LL |
| 12 | rs13481561    | SS | LL | LL | LL | SS | SS | SS | SS | LL | LL |
| 12 | rs6263380     | SS | LL | LL | LL | SS | LL | SS | SS | LL | LL |
| 12 | rs13481571    | SS | LL | LL | LL | LL | SS | SS | SS | SS | SS |
| 12 | rs3711162     | LL | LL | LL | LL | LL | SS | SS | SS | SS | SS |
| 12 | rs6288403     | LL | LL | LL | LL | LL | LL | SS | SS | SS | SS |
| 12 | rs13481592    | LL | LL | LL | SS | SS | LL | SS | SS | SS | SS |
| 12 | rs3679514     | LL | LL | LL | SS | SS | LL | LL | SS | SS | SS |
| 12 | rs13481618    | LL | LL | LL | SS | SS | LL | LL | SS | SS | SS |
| 12 | rs13481632    | LL | LL | LL | LL | SS | LL | LL | SS | SS | LL |
| 12 | rs13481641    | LL | LL | LL | LL | SS | LL | LL | SS | SS | LL |
| 12 | rs13481651    | LL | LL | LL | LL | SS | LL | LL | SS | SS | LL |
| 12 | rs4229612     | LL | LL | LL | SS | LL | SS | LL | SS | SS | LL |
| 13 | rs6215262     | LL | SS | SS | SS | SS | LL | SS | SS | SS | LL |
| 13 | rs13481702    | LL | SS | SS | SS | SS | SS | SS | SS | SS | LL |
| 13 | rs13481706    | LL | SS | SS | SS | SS | SS | SS | SS | LL | LL |
| 13 | rs3678616     | LL | SS | SS | SS | SS | SS | SS | SS | LL | LL |
| 13 | gnf13.016.175 | LL | SS | SS | SS | SS | SS | SS | SS | LL | LL |
| 13 | rs4229685     | LL | SS | LL | SS | SS | SS | SS | SS | SS | SS |
| 13 | rs3724709     | LL | SS | LL | SS | LL | SS | SS | SS | SS | SS |
| 13 | gnf13.038.133 | SS | SS | LL | SS | LL | SS | SS | SS | SS | SS |
| 13 | rs6271232     | SS | SS | LL | LL | LL | SS | SS | SS | SS | SS |
| 13 | rs3688207     | SS | SS | LL | LL | LL | SS | SS | SS | SS | SS |
| 13 | rs13481823    | SS | SS | LL | LL | LL | SS | SS | LL | SS | SS |
| 13 | gnf13.057.762 | LL | SS | LL | LL | LL | SS | SS | LL | SS | SS |
| 13 | rs6410679     | LL | SS | LL | LL | LL | SS | SS | LL | LL | SS |
| 13 | rs6381045     | LL | SS | LL | LL | LL | SS | SS | LL | LL | SS |
| 13 | rs3721965     | LL | SS | LL | LL | LL | SS | SS | LL | LL | SS |
| 13 | rs13481886    | LL | SS | LL | LL | SS | SS | SS | LL | LL | SS |
| 13 | rs13481892    | LL | SS | LL | LL | SS | LL | SS | LL | LL | SS |
| 13 | mCV24625340   | LL | SS | LL | LL | SS | LL | SS | LL | LL | LL |
| 13 | gnf13.092.499 | LL | SS | SS | LL | SS | LL | SS | LL | LL | LL |
| 13 | rs13481958    | LL | SS | SS | LL | SS | LL | SS | LL | LL | LL |
| 13 | rs3688959     | LL | SS | SS | LL | LL | LL | SS | SS | LL | LL |
| 13 | rs6389588     | LL | SS | LL | LL | LL | LL | SS | SS | LL | LL |
| 13 | rs13482000    | LL | SS | LL | LL | LL | LL | SS | SS | LL | LL |

|    |                  |    |    |    |    |    |    |    |    |    |    |
|----|------------------|----|----|----|----|----|----|----|----|----|----|
| 13 | mCV24886326      | LL | SS | LL | SS | LL | LL | SS | SS | SS | LL |
| 13 | rs6247696        | LL | SS | LL | SS | LL | SS | SS | SS | SS | LL |
| 13 | rs6397687        | LL | LL | LL | SS | LL | SS | SS | SS | SS | LL |
| 14 | rs3687889        | SS | LL | LL | LL | LL | LL | SS | SS | SS | SS |
| 14 | rs6397486        | SS | LL | LL | LL | LL | LL | SS | SS | SS | SS |
| 14 | mCV23128760      | SS | LL | LL | LL | LL | LL | SS | LL | SS | SS |
| 14 | rs3701623        | SS | LL | LL | LL | LL | LL | SS | LL | SS | SS |
| 14 | rs13482262       | SS | LL | LL | LL | LL | LL | SS | SS | SS | SS |
| 14 | rs6352085        | SS | LL | LL | LL | LL | LL | SS | SS | SS | SS |
| 14 | rs13482276       | SS | LL | LL | LL | LL | LL | SS | SS | SS | SS |
| 14 | rs13482281       | SS | LL | LL | LL | LL | LL | SS | SS | SS | SS |
| 14 | rs13482296       | SS | LL | LL | SS | LL | SS | SS | SS | SS | SS |
| 14 | rs6211694        | SS | LL | LL | SS | LL | SS | SS | LL | SS | SS |
| 14 | CEL-14_110783830 | SS | LL | LL | SS | LL | SS | SS | LL | SS | SS |
| 14 | rs3707842        | SS | LL | LL | SS | LL | SS | SS | LL | SS | SS |
| 14 | gnf14.117.278    | SS | LL | LL | SS | LL | SS | SS | LL | SS | SS |
| 14 | rs13482416       | SS | LL | LL | SS | LL | SS | SS | LL | SS | SS |
| 15 | rs13459176       | SS | LL | LL | LL | LL | LL | LL | SS | LL | LL |
| 15 | rs13482431       | SS | LL | LL | LL | LL | LL | LL | SS | LL | LL |
| 15 | rs13482446       | SS | LL | SS | LL | LL | LL | LL | SS | LL | SS |
| 15 | CEL-15_15919629  | SS | SS | SS | LL | LL | LL | LL | SS | LL | SS |
| 15 | rs13482461       | SS | SS | SS | LL | LL | SS | LL | SS | LL | SS |
| 15 | rs13482486       | SS | SS | SS | LL | LL | SS | LL | SS | LL | SS |
| 15 | rs3670581        | SS | SS | SS | LL | LL | SS | SS | SS | LL | SS |
| 15 | rs13482498       | SS | SS | SS | SS | LL | SS | SS | SS | LL | SS |
| 15 | rs3088525        | SS | SS | SS | SS | LL | SS | SS | SS | LL | SS |
| 15 | rs6188239        | SS | SS | SS | LL | LL | SS | SS | SS | LL | SS |
| 15 | rs3695416        | SS | LL | SS | LL | LL | SS | SS | SS | LL | SS |
| 15 | rs3677296        | SS | LL | SS | LL | LL | SS | SS | SS | LL | SS |
| 15 | rs13482536       | SS | LL | SS | SS | LL | LL | SS | SS | SS | SS |
| 15 | rs13482541       | SS | LL | SS | LL | LL | LL | SS | SS | SS | SS |
| 15 | rs3660290        | SS | LL | SS | LL | LL | LL | SS | SS | SS | SS |
| 15 | rs13482589       | SS | SS | SS | LL | LL | LL | SS | SS | SS | SS |
| 15 | rs13482595       | SS | SS | SS | LL | LL | LL | LL | SS | SS | SS |
| 15 | rs13482612       | SS | SS | SS | LL | LL | LL | SS | SS | LL | SS |
| 15 | rs13482618       | SS | SS | SS | LL | LL | LL | SS | SS | LL | SS |
| 15 | rs6197332        | SS | SS | SS | LL | LL | LL | SS | SS | LL | SS |
| 15 | rs13482642       | SS | SS | SS | SS | LL | LL | SS | SS | LL | SS |
| 15 | rs6287697        | LL | SS | SS | SS | LL | LL | SS | LL | LL | SS |
| 15 | rs13482711       | SS | SS | SS | SS | LL | LL | SS | LL | LL | SS |
| 15 | rs13482719       | SS | SS | LL | SS | LL | LL | SS | LL | LL | SS |
| 15 | rs13482726       | SS | SS | LL | SS | LL | SS | SS | LL | LL | SS |

|    |               |    |    |    |    |    |    |    |    |    |    |
|----|---------------|----|----|----|----|----|----|----|----|----|----|
| 15 | rs13482732    | SS | SS | SS | SS | LL | SS | SS | LL | LL | SS |
| 15 | rs3708604     | SS | SS | SS | LL | LL | SS | LL | LL | LL | SS |
| 15 | rs13482741    | SS | SS | SS | LL | LL | LL | LL | LL | LL | SS |
| 16 | rs4152386     | LL | SS | LL | SS | SS | SS | SS | LL | SS | SS |
| 16 | rs4165119     | LL | SS | LL | LL | SS | LL | SS | LL | SS | LL |
| 16 | rs6294027     | LL | SS | LL | LL | SS | LL | LL | LL | SS | LL |
| 16 | rs4172338     | LL | SS | LL | SS | SS | SS | LL | LL | SS | LL |
| 16 | rs4173709     | LL | SS | SS | SS | SS | SS | LL | LL | SS | LL |
| 16 | rs4175608     | LL | SS | SS | SS | SS | SS | LL | LL | SS | LL |
| 16 | rs4177203     | LL | SS | SS | SS | SS | SS | LL | LL | SS | LL |
| 16 | rs4179117     | SS | SS | SS | SS | SS | SS | SS | LL | SS | SS |
| 16 | rs4184315     | SS | SS | SS | SS | LL | SS | SS | LL | SS | SS |
| 16 | rs4185176     | SS | SS | SS | SS | LL | SS | SS | LL | SS | SS |
| 16 | rs6271301     | SS | SS | SS | SS | SS | SS | SS | LL | SS | SS |
| 16 | rs4192132     | SS | SS | SS | SS | SS | SS | SS | LL | SS | LL |
| 16 | rs4197416     | SS | SS | SS | SS | SS | SS | SS | LL | SS | LL |
| 16 | rs4197725     | SS | LL | SS | SS | SS | SS | SS | LL | SS | LL |
| 16 | rs4202372     | SS | LL | SS | SS | SS | SS | SS | LL | SS | LL |
| 16 | rs4203891     | SS | SS | SS | SS | SS | LL | SS | LL | SS | LL |
| 16 | rs4205524     | SS | SS | SS | SS | SS | LL | SS | LL | SS | LL |
| 16 | rs4211515     | SS | SS | SS | SS | SS | LL | SS | LL | SS | LL |
| 16 | rs4211731     | SS | SS | SS | SS | SS | SS | SS | LL | SS | LL |
| 16 | rs4219239     | SS | SS | LL | SS | SS | SS | SS | LL | SS | LL |
| 16 | rs4219897     | SS | SS | LL | SS | SS | SS | SS | LL | SS | SS |
| 17 | rs3724616     | LL | SS | LL | LL | LL | LL | LL | SS | SS | LL |
| 17 | rs3702484     | SS | SS | LL | LL | LL | LL | SS | SS | SS | LL |
| 17 | rs4231344     | SS | SS | LL | LL | SS | LL | SS | SS | SS | LL |
| 17 | rs3090500     | SS | SS | LL | SS | SS | LL | SS | SS | SS | LL |
| 17 | rs4136360     | SS | SS | LL | SS | SS | NA | SS | SS | SS | LL |
| 17 | rs6358703     | SS | LL | LL | SS | SS | NA | SS | SS | SS | LL |
| 17 | rs13482947    | LL | LL | LL | SS | LL | NA | SS | SS | SS | LL |
| 17 | gnf17.035.152 | LL | LL | LL | SS | LL | NA | SS | SS | SS | LL |
| 17 | rs13482968    | LL | LL | LL | LL | LL | NA | SS | SS | SS | LL |
| 17 | rs13482973    | LL | LL | LL | LL | LL | NA | SS | SS | SS | LL |
| 17 | rs3090988     | LL | LL | LL | LL | LL | LL | SS | SS | SS | LL |
| 17 | mCV22888090   | LL | LL | LL | SS | LL | LL | LL | LL | SS | LL |
| 17 | rs13483075    | LL | LL | LL | SS | LL | SS | LL | LL | SS | LL |
| 17 | rs6322076     | LL | LL | SS | SS | LL | LL | LL | LL | SS | LL |
| 17 | rs6386440     | LL | LL | SS | SS | LL | LL | LL | LL | SS | SS |
| 17 | rs3684732     | LL | SS | SS | LL | SS | SS | SS | LL | SS | SS |
| 17 | rs3701338     | LL | SS | SS | LL | SS | SS | LL | LL | SS | SS |
| 17 | rs13483144    | LL | SS | SS | LL | SS | SS | LL | LL | SS | SS |

|    |                 |    |    |    |    |    |    |    |    |    |    |
|----|-----------------|----|----|----|----|----|----|----|----|----|----|
| 18 | rs13483183      | LL | LL | SS | LL | LL | LL | SS | LL | SS | LL |
| 18 | rs13483200      | SS | LL | SS | LL | LL | LL | SS | LL | SS | LL |
| 18 | rs13483210      | SS | LL | SS | LL | LL | LL | SS | LL | SS | LL |
| 18 | mCV23617245     | LL | LL | SS | LL | LL | LL | SS | LL | SS | LL |
| 18 | rs6194744       | LL | LL | LL | LL | LL | LL | SS | LL | SS | LL |
| 18 | rs13483262      | LL | LL | LL | LL | LL | LL | SS | SS | SS | LL |
| 18 | rs13483277      | LL | LL | LL | LL | LL | LL | SS | SS | LL | LL |
| 18 | CEL-18_32158369 | LL | LL | LL | LL | LL | LL | SS | SS | LL | LL |
| 18 | rs3675531       | LL | LL | SS | LL | LL | LL | SS | SS | LL | LL |
| 18 | gnf18.033.953   | LL | LL | SS | LL | SS | LL | SS | SS | LL | LL |
| 18 | rs13483319      | LL | LL | SS | LL | SS | LL | SS | SS | LL | SS |
| 18 | rs6313313       | LL | LL | SS | SS | SS | SS | SS | SS | LL | SS |
| 18 | rs3676196       | SS | LL | SS | SS | SS | SS | SS | SS | LL | SS |
| 18 | rs13483340      | SS | LL | SS | SS | SS | SS | SS | SS | LL | SS |
| 18 | rs6184541       | SS | LL | LL | SS | SS | SS | SS | SS | LL | SS |
| 18 | rs3654438       | SS | LL | LL | SS | SS | SS | SS | SS | LL | SS |
| 18 | rs3688789       | SS | LL | LL | SS | SS | SS | SS | LL | LL | SS |
| 18 | rs3716803       | SS | LL | LL | SS | SS | SS | LL | LL | LL | SS |
| 18 | rs13483423      | SS | LL | LL | SS | SS | SS | LL | SS | LL | SS |
| 18 | gnf18.069.928   | SS | LL | LL | SS | SS | SS | SS | SS | LL | SS |
| 18 | rs6302629       | SS | LL | LL | SS | LL | SS | SS | SS | LL | SS |
| 18 | rs3705890       | SS | LL | LL | SS | LL | SS | SS | SS | LL | SS |
| 18 | rs3671707       | LL | LL | LL | SS | LL | SS | LL | SS | LL | SS |
| 18 | rs13483466      | LL | LL | LL | SS | SS | SS | LL | SS | LL | SS |
| 19 | rs3713033       | LL | LL | SS | LL | SS | LL | LL | LL | SS | LL |
| 19 | rs13483526      | LL | LL | SS | LL | SS | LL | LL | LL | SS | LL |
| 19 | rs6316813       | LL | LL | SS | SS | SS | SS | LL | LL | SS | LL |
| 19 | rs6307076       | LL | LL | SS | SS | SS | SS | LL | LL | SS | LL |
| 19 | rs6342493       | SS | LL | SS | SS | SS | SS | LL | LL | LL | SS |
| 19 | rs6291559       | SS | LL | SS | SS | SS | SS | LL | LL | LL | LL |
| 19 | rs3714482       | SS | LL | LL | SS | SS | SS | LL | LL | LL | LL |
| 19 | CEL-19_32349880 | SS | LL | SS | SS | SS | SS | LL | LL | SS | SS |
| 19 | rs13483650      | SS | LL | SS | SS | LL | SS | LL | SS | LL | SS |
| 19 | CEL-19_48242857 | SS | LL | SS | SS | LL | SS | LL | SS | LL | SS |
| 19 | rs13483677      | SS | LL | SS | SS | LL | SS | LL | SS | LL | SS |
| 19 | rs3711945       | SS | LL | SS | SS | SS | SS | LL | SS | LL | SS |
| X  | rs13483712      | LL | SS | LL | LL | SS | LL | LL | LL | SS | LL |
| X  | rs13483724      | LL | SS | LL | LL | LL | LL | LL | LL | SS | LL |
| X  | rs13483777      | LL | SS | LL | LL | LL | LL | SS | LL | SS | LL |
| X  | rs13483884      | LL | SS | LL | LL | LL | LL | SS | LL | SS | LL |
| X  | rs13483899      | SS | SS | LL | LL | LL | LL | SS | LL | SS | LL |
| X  | gnfX.084.751    | SS | SS | LL | LL | LL | LL | SS | LL | SS | LL |



|   |                 |    |    |    |    |    |    |    |    |    |    |
|---|-----------------|----|----|----|----|----|----|----|----|----|----|
| X | gnfX.086.039    | SS | SS | LL | LL | LL | LL | SS | LL | SS | LL |
| X | rs13483951      | SS | SS | LL | SS | LL | LL | SS | LL | SS | LL |
| X | rs6205221       | SS | LL | LL | SS | LL | LL | SS | LL | SS | LL |
| X | rs13484003      | SS | LL | LL | LL | LL | LL | SS | LL | SS | LL |
| X | gnfX.118.600    | SS | LL | LL | LL | LL | LL | SS | LL | SS | LL |
| X | rs13484038      | SS | LL | LL | LL | LL | LL | SS | LL | LL | LL |
| X | gnfX.124.190    | SS | LL | LL | LL | LL | LL | SS | LL | SS | LL |
| X | CEL-X_133525088 | SS | SS | LL | LL | LL | LL | SS | LL | SS | LL |
| X | rs13484050      | SS | SS | LL | LL | LL | LL | SS | LL | SS | LL |
| X | rs13484093      | SS | SS | LL | LL | LL | LL | LL | LL | LL | LL |
| X | rs13484094      | SS | SS | LL | LL | LL | LL | LL | LL | LL | LL |

---
