# Supplementary material for: Quantitative Trait Loci Affecting Liver Fat Content in Mice
Source: PubMed Central journal article supplement (PMC3429915; doi:10.1534/g3.112.003343), 2012-09-01
Supplement: supp_2.9.1019_TableS1.pdf [file supp_2.9.1019_TableS1.pdf]

**Table S1** Number of mice (N), average liver fat content and standard deviation (SD), average liver fattiness and standard deviation (SD), by cohort.

| Cohort        | N         | Liver Fat Content |             | Liver Fattiness |             |
|---------------|-----------|-------------------|-------------|-----------------|-------------|
|               |           | Average (%)       | SD          | Average (mg)    | SD          |
| <b>4 All</b>  | <b>21</b> | <b>0.30</b>       | <b>0.04</b> | <b>1.02</b>     | <b>1.39</b> |
| 4 HF F        | 3         | 0.37              | 0.02        | 1.02            | 0.99        |
| 4 HF M        | 5         | 0.29              | 0.03        | 0.96            | 0.89        |
| 4 LF F        | 6         | 0.26              | 0.02        | 0.10            | 1.23        |
| 4 LF M        | 7         | 0.30              | 0.04        | 1.84            | 1.63        |
| <b>5 All</b>  | <b>28</b> | <b>0.26</b>       | <b>0.05</b> | <b>-0.04</b>    | <b>1.77</b> |
| 5 HF F        | 7         | 0.29              | 0.04        | 0.65            | 1.67        |
| 5 HF M        | 9         | 0.24              | 0.04        | -0.65           | 1.48        |
| 5 LF F        | 7         | 0.27              | 0.05        | -0.55           | 2.21        |
| 5 LF M        | 5         | 0.26              | 0.03        | 0.79            | 1.55        |
| <b>10 All</b> | <b>26</b> | <b>0.25</b>       | <b>0.06</b> | <b>-0.43</b>    | <b>2.53</b> |
| 10 HF F       | 5         | 0.34              | 0.03        | 1.40            | 1.96        |
| 10 HF M       | 7         | 0.25              | 0.05        | -0.06           | 2.21        |
| 10 LF F       | 6         | 0.26              | 0.02        | 0.61            | 0.75        |
| 10 LF M       | 8         | 0.19              | 0.04        | -2.68           | 2.60        |
| <b>15 All</b> | <b>31</b> | <b>0.22</b>       | <b>0.05</b> | <b>-1.27</b>    | <b>1.94</b> |
| 15 HF F       | 6         | 0.23              | 0.05        | -2.15           | 2.75        |
| 15 HF M       | 9         | 0.21              | 0.05        | -1.64           | 2.19        |
| 15 LF F       | 9         | 0.24              | 0.04        | -1.25           | 1.40        |
| 15 LF M       | 7         | 0.20              | 0.02        | -0.20           | 1.09        |
| <b>18 All</b> | <b>28</b> | <b>0.29</b>       | <b>0.07</b> | <b>0.94</b>     | <b>2.18</b> |
| 18 HF F       | 6         | 0.31              | 0.03        | 1.22            | 0.99        |
| 18 HF M       | 7         | 0.35              | 0.07        | 3.05            | 1.76        |
| 18 LF F       | 9         | 0.23              | 0.03        | -1.02           | 1.28        |
| 18 LF M       | 6         | 0.29              | 0.08        | 1.15            | 2.23        |
| <b>19 All</b> | <b>31</b> | <b>0.26</b>       | <b>0.04</b> | <b>0.41</b>     | <b>1.54</b> |
| 19HF F        | 7         | 0.30              | 0.05        | 1.20            | 0.40        |
| 19 HF M       | 8         | 0.26              | 0.02        | 0.07            | 1.62        |
| 19 LF F       | 7         | 0.26              | 0.04        | 0.05            | 1.12        |
| 19 LF M       | 9         | 0.24              | 0.05        | 0.35            | 2.19        |

|               |           |             |             |              |             |
|---------------|-----------|-------------|-------------|--------------|-------------|
| <b>20 All</b> | <b>16</b> | <b>0.25</b> | <b>0.13</b> | <b>-1.12</b> | <b>2.50</b> |
| 20 HF F       | 2         | 0.22        | 0.00        | -1.32        | 0.89        |
| 20 HF M       | 4         | 0.24        | 0.19        | -1.95        | 1.55        |
| 20 LF F       | 5         | 0.26        | 0.14        | -1.66        | 2.10        |
| 20 LF M       | 5         | 0.25        | 0.12        | 0.17         | 3.74        |
| <b>22 All</b> | <b>44</b> | <b>0.37</b> | <b>0.10</b> | <b>2.30</b>  | <b>2.44</b> |
| 22 HF F       | 12        | 0.41        | 0.06        | 3.42         | 1.82        |
| 22 HF M       | 12        | 0.46        | 0.05        | 3.55         | 2.25        |
| 22 LF F       | 12        | 0.32        | 0.06        | 1.00         | 2.63        |
| 22 LF M       | 8         | 0.26        | 0.08        | 0.69         | 1.38        |
| <b>23 All</b> | <b>38</b> | <b>0.26</b> | <b>0.06</b> | <b>0.48</b>  | <b>2.03</b> |
| 23 HF F       | 7         | 0.31        | 0.07        | 1.72         | 2.71        |
| 23 HF M       | 10        | 0.25        | 0.06        | -0.02        | 1.50        |
| 23 LF F       | 9         | 0.25        | 0.05        | -0.48        | 1.73        |
| 23 LF M       | 12        | 0.24        | 0.04        | 0.89         | 1.94        |
| <b>31 All</b> | <b>11</b> | <b>0.26</b> | <b>0.04</b> | <b>0.19</b>  | <b>2.34</b> |
| 31 HF F       | 4         | 0.27        | 0.05        | -0.21        | 2.17        |
| 31 HF M       | 5         | 0.26        | 0.05        | 1.19         | 1.37        |
| 31 LF F       | 1         | 0.19        | --          | -5.26        | --          |
| 31 LF M       | 2         | 0.28        | 0.01        | 1.22         | 1.04        |
| <b>33 All</b> | <b>23</b> | <b>0.28</b> | <b>0.08</b> | <b>0.74</b>  | <b>1.79</b> |
| 33 HF F       | 4         | 0.40        | 0.09        | 3.20         | 0.83        |
| 33 HF M       | 7         | 0.28        | 0.05        | 0.65         | 1.20        |
| 33 LF F       | 7         | 0.23        | 0.03        | -0.33        | 0.98        |
| 33 LF M       | 5         | 0.23        | 0.02        | 0.39         | 2.27        |
| <b>35 All</b> | <b>26</b> | <b>0.25</b> | <b>0.07</b> | <b>-0.16</b> | <b>1.60</b> |
| 35 HF F       | 6         | 0.26        | 0.04        | -0.45        | 1.50        |
| 35 HF M       | 5         | 0.36        | 0.09        | 0.88         | 2.12        |
| 35 LF F       | 7         | 0.20        | 0.03        | -1.07        | 1.34        |
| 35 LF M       | 8         | 0.23        | 0.04        | 0.08         | 1.11        |

|               |           |             |             |              |             |
|---------------|-----------|-------------|-------------|--------------|-------------|
| <b>38 All</b> | <b>30</b> | <b>0.21</b> | <b>0.05</b> | <b>-1.43</b> | <b>1.95</b> |
| 38 HF F       | 7         | 0.25        | 0.04        | -2.64        | 3.15        |
| 38 HF M       | 7         | 0.18        | 0.04        | -0.95        | 1.33        |
| 38 LF F       | 8         | 0.23        | 0.04        | -0.78        | 1.21        |
| 38 LF M       | 8         | 0.17        | 0.03        | -1.44        | 1.45        |
| <br>          |           |             |             |              |             |
| <b>45 All</b> | <b>16</b> | <b>0.29</b> | <b>0.03</b> | <b>0.64</b>  | <b>2.85</b> |
| 45 HF F       | 5         | 0.29        | 0.03        | 0.05         | 3.60        |
| 45 HF M       | 3         | 0.31        | 0.02        | 2.72         | 0.67        |
| 45 LF F       | 5         | 0.27        | 0.04        | -1.16        | 2.58        |
| 45 LF M       | 3         | 0.32        | 0.02        | 2.51         | 0.72        |
| <br>          |           |             |             |              |             |
| <b>46 All</b> | <b>27</b> | <b>0.23</b> | <b>0.06</b> | <b>-0.40</b> | <b>2.14</b> |
| 46 HF F       | 5         | 0.23        | 0.09        | -1.00        | 3.73        |
| 46 HF M       | 6         | 0.24        | 0.07        | 0.29         | 1.18        |
| 46 LF F       | 8         | 0.21        | 0.04        | -1.15        | 1.59        |
| 46 LF M       | 8         | 0.24        | 0.05        | 0.21         | 1.96        |
| <br>          |           |             |             |              |             |
| <b>48 All</b> | <b>28</b> | <b>0.31</b> | <b>0.11</b> | <b>1.14</b>  | <b>3.19</b> |
| 48 HF F       | 6         | 0.37        | 0.10        | 2.09         | 4.15        |
| 48 HF M       | 7         | 0.43        | 0.05        | 4.40         | 1.41        |
| 48 LF F       | 9         | 0.22        | 0.06        | -0.92        | 2.02        |
| 48 LF M       | 6         | 0.22        | 0.05        | -0.52        | 1.38        |
| <br>          |           |             |             |              |             |
| <b>LG All</b> | <b>25</b> | <b>0.19</b> | <b>0.05</b> | <b>-3.60</b> | <b>2.97</b> |
| LG HF F       | 6         | 0.24        | 0.02        | -4.63        | 3.32        |
| LG HF M       | 7         | 0.22        | 0.03        | -2.13        | 2.32        |
| LG LF F       | 6         | 0.15        | 0.03        | -3.36        | 4.09        |
| LG LF M       | 6         | 0.13        | 0.02        | -4.27        | 1.74        |
| <br>          |           |             |             |              |             |
| <b>SM All</b> | <b>29</b> | <b>0.25</b> | <b>0.11</b> | <b>-0.94</b> | <b>2.48</b> |
| SM HF F       | 6         | 0.33        | 0.05        | -0.18        | 1.97        |
| SM HF M       | 11        | 0.33        | 0.10        | 0.41         | 2.51        |
| SM LF F       | 6         | 0.14        | 0.02        | -2.58        | 2.20        |
| SM LF M       | 6         | 0.14        | 0.02        | -2.52        | 1.50        |

---
