# Supplementary material for: Quantitative Trait Loci Affecting Liver Fat Content in Mice
Source: PubMed Central journal article supplement (PMC3429915; doi:10.1534/g3.112.003343), 2012-09-01
Supplement: supp_2.9.1019_TableS2.pdf [file supp_2.9.1019_TableS2.pdf]

**Table S2 Hepatic fat phenotypes.**

|    | <b>Sex</b> | <b>Diet</b> | <b>Strain</b> | <b>Fattiness</b> | <b>Fat Content</b> |
|----|------------|-------------|---------------|------------------|--------------------|
| 1  | ♀          | LF          | SM/J          | -4.89            | 0.17               |
| 2  | ♀          | LF          | SM/J          | -4.76            | 0.12               |
| 3  | ♂          | LF          | SM/J          | -4.48            | 0.11               |
| 4  | ♂          | LF          | SM/J          | -3.87            | 0.11               |
| 5  | ♂          | HF          | SM/J          | -3.86            | 0.16               |
| 6  | ♀          | LF          | SM/J          | -3.34            | 0.14               |
| 7  | ♂          | LF          | SM/J          | -2.55            | 0.13               |
| 8  | ♀          | LF          | SM/J          | -2.50            | 0.16               |
| 9  | ♀          | HF          | SM/J          | -2.33            | 0.32               |
| 10 | ♂          | LF          | SM/J          | -2.02            | 0.17               |
| 11 | ♂          | LF          | SM/J          | -1.91            | 0.15               |
| 12 | ♀          | HF          | SM/J          | -1.55            | 0.31               |
| 13 | ♂          | HF          | SM/J          | -1.52            | 0.25               |
| 14 | ♀          | HF          | SM/J          | -1.37            | 0.29               |
| 15 | ♂          | HF          | SM/J          | -0.86            | 0.29               |
| 16 | ♂          | HF          | SM/J          | -0.83            | 0.15               |
| 17 | ♂          | HF          | SM/J          | -0.54            | 0.37               |
| 18 | ♀          | LF          | SM/J          | -0.29            | 0.14               |
| 19 | ♂          | LF          | SM/J          | -0.29            | 0.15               |
| 20 | ♀          | HF          | SM/J          | -0.03            | 0.28               |
| 21 | ♂          | HF          | SM/J          | 0.15             | 0.41               |
| 22 | ♀          | LF          | SM/J          | 0.31             | 0.14               |
| 23 | ♂          | HF          | SM/J          | 0.85             | 0.34               |
| 24 | ♂          | HF          | SM/J          | 0.87             | 0.45               |
| 25 | ♂          | HF          | SM/J          | 0.97             | 0.37               |
| 26 | ♀          | HF          | SM/J          | 1.39             | 0.39               |
| 27 | ♀          | HF          | SM/J          | 2.81             | 0.37               |
| 28 | ♂          | HF          | SM/J          | 4.20             | 0.43               |
| 29 | ♂          | HF          | SM/J          | 5.06             | 0.40               |
| 30 | ♀          | LF          | LG/J          | -9.99            | 0.14               |
| 31 | ♀          | HF          | LG/J          | -8.94            | 0.24               |
| 32 | ♀          | HF          | LG/J          | -7.72            | 0.23               |
| 33 | ♂          | LF          | LG/J          | -6.71            | 0.15               |
| 34 | ♀          | LF          | LG/J          | -6.05            | 0.12               |
| 35 | ♀          | HF          | LG/J          | -5.33            | 0.23               |
| 36 | ♂          | LF          | LG/J          | -5.26            | 0.12               |
| 37 | ♂          | LF          | LG/J          | -5.21            | 0.11               |
| 38 | ♂          | HF          | LG/J          | -4.81            | 0.25               |

|    |   |    |      |       |      |
|----|---|----|------|-------|------|
| 39 | ♂ | HF | LG/J | -4.31 | 0.17 |
| 40 | ♀ | LF | LG/J | -3.82 | 0.12 |
| 41 | ♂ | LF | LG/J | -3.61 | 0.14 |
| 42 | ♀ | HF | LG/J | -3.50 | 0.27 |
| 43 | ♂ | HF | LG/J | -3.03 | 0.20 |
| 44 | ♂ | LF | LG/J | -2.57 | 0.16 |
| 45 | ♂ | LF | LG/J | -2.28 | 0.13 |
| 46 | ♀ | HF | LG/J | -1.86 | 0.26 |
| 47 | ♂ | HF | LG/J | -1.19 | 0.21 |
| 48 | ♂ | HF | LG/J | -0.57 | 0.23 |
| 49 | ♀ | HF | LG/J | -0.42 | 0.23 |
| 50 | ♀ | LF | LG/J | -0.17 | 0.16 |
| 51 | ♀ | LF | LG/J | -0.11 | 0.19 |
| 52 | ♀ | LF | LG/J | 0.01  | 0.16 |
| 53 | ♂ | HF | LG/J | 1.15  | 0.22 |
| 54 | ♂ | LF | 4    | -1.31 | 0.24 |
| 55 | ♀ | LF | 4    | -1.27 | 0.23 |
| 56 | ♀ | LF | 4    | -1.13 | 0.25 |
| 57 | ♀ | LF | 4    | 0.02  | 0.29 |
| 58 | ♂ | HF | 4    | 0.12  | 0.26 |
| 59 | ♂ | HF | 4    | 0.12  | 0.27 |
| 60 | ♀ | LF | 4    | 0.13  | 0.26 |
| 61 | ♀ | HF | 4    | 0.16  | 0.35 |
| 62 | ♀ | HF | 4    | 0.79  | 0.37 |
| 63 | ♂ | HF | 4    | 0.87  | 0.27 |
| 64 | ♀ | LF | 4    | 0.92  | 0.28 |
| 65 | ♂ | LF | 4    | 1.33  | 0.33 |
| 66 | ♂ | HF | 4    | 1.51  | 0.33 |
| 67 | ♂ | LF | 4    | 1.81  | 0.33 |
| 68 | ♂ | LF | 4    | 1.84  | 0.35 |
| 69 | ♀ | LF | 4    | 1.97  | 0.27 |
| 70 | ♀ | HF | 4    | 2.11  | 0.40 |
| 71 | ♂ | HF | 4    | 2.16  | 0.32 |
| 72 | ♂ | LF | 4    | 2.29  | 0.28 |
| 73 | ♂ | LF | 4    | 3.21  | 0.29 |
| 74 | ♂ | LF | 4    | 3.75  | 0.29 |
| 75 | ♀ | LF | 5    | -3.73 | 0.25 |
| 76 | ♂ | HF | 5    | -2.64 | 0.22 |
| 77 | ♂ | HF | 5    | -2.43 | 0.28 |
| 78 | ♀ | LF | 5    | -1.79 | 0.23 |
| 79 | ♀ | LF | 5    | -1.79 | 0.24 |
| 80 | ♂ | HF | 5    | -1.37 | 0.26 |

|     |   |    |    |       |      |
|-----|---|----|----|-------|------|
| 81  | ♀ | HF | 5  | -1.36 | 0.22 |
| 82  | ♂ | LF | 5  | -1.01 | 0.22 |
| 83  | ♀ | HF | 5  | -0.94 | 0.27 |
| 84  | ♂ | HF | 5  | -0.93 | 0.20 |
| 85  | ♂ | HF | 5  | -0.92 | 0.23 |
| 86  | ♀ | HF | 5  | -0.86 | 0.27 |
| 87  | ♀ | LF | 5  | -0.46 | 0.32 |
| 88  | ♂ | LF | 5  | -0.42 | 0.30 |
| 89  | ♂ | HF | 5  | -0.39 | 0.19 |
| 90  | ♂ | HF | 5  | -0.14 | 0.20 |
| 91  | ♀ | LF | 5  | -0.10 | 0.23 |
| 92  | ♂ | LF | 5  | 0.77  | 0.23 |
| 93  | ♀ | LF | 5  | 0.86  | 0.25 |
| 94  | ♀ | HF | 5  | 0.93  | 0.28 |
| 95  | ♂ | HF | 5  | 1.18  | 0.30 |
| 96  | ♂ | HF | 5  | 1.79  | 0.28 |
| 97  | ♂ | LF | 5  | 1.99  | 0.24 |
| 98  | ♀ | HF | 5  | 2.01  | 0.33 |
| 99  | ♀ | HF | 5  | 2.27  | 0.33 |
| 100 | ♀ | HF | 5  | 2.47  | 0.34 |
| 101 | ♂ | LF | 5  | 2.63  | 0.29 |
| 102 | ♀ | LF | 5  | 3.18  | 0.35 |
| 103 | ♂ | LF | 10 | -6.86 | 0.16 |
| 104 | ♂ | LF | 10 | -5.55 | 0.18 |
| 105 | ♂ | LF | 10 | -3.55 | 0.15 |
| 106 | ♂ | HF | 10 | -3.15 | 0.28 |
| 107 | ♂ | LF | 10 | -2.87 | 0.20 |
| 108 | ♂ | LF | 10 | -2.28 | 0.18 |
| 109 | ♂ | HF | 10 | -1.41 | 0.17 |
| 110 | ♂ | HF | 10 | -0.85 | 0.20 |
| 111 | ♂ | HF | 10 | -0.84 | 0.25 |
| 112 | ♀ | HF | 10 | -0.64 | 0.35 |
| 113 | ♂ | LF | 10 | -0.52 | 0.26 |
| 114 | ♂ | LF | 10 | -0.34 | 0.24 |
| 115 | ♀ | LF | 10 | -0.06 | 0.25 |
| 116 | ♀ | LF | 10 | 0.03  | 0.24 |
| 117 | ♀ | HF | 10 | 0.21  | 0.38 |
| 118 | ♀ | LF | 10 | 0.37  | 0.26 |
| 119 | ♀ | LF | 10 | 0.39  | 0.30 |
| 120 | ♀ | HF | 10 | 0.44  | 0.30 |
| 121 | ♂ | HF | 10 | 0.50  | 0.24 |
| 122 | ♂ | LF | 10 | 0.57  | 0.18 |

|     |   |    |    |       |      |
|-----|---|----|----|-------|------|
| 123 | ♀ | LF | 10 | 0.99  | 0.27 |
| 124 | ♂ | HF | 10 | 1.74  | 0.28 |
| 125 | ♀ | LF | 10 | 1.94  | 0.27 |
| 126 | ♀ | HF | 10 | 3.48  | 0.33 |
| 127 | ♀ | HF | 10 | 3.54  | 0.35 |
| 128 | ♂ | HF | 10 | 3.58  | 0.32 |
| 129 | ♀ | HF | 15 | -5.93 | 0.14 |
| 130 | ♂ | HF | 15 | -5.72 | 0.15 |
| 131 | ♀ | HF | 15 | -4.23 | 0.26 |
| 132 | ♀ | LF | 15 | -3.77 | 0.18 |
| 133 | ♂ | HF | 15 | -3.35 | 0.15 |
| 134 | ♀ | HF | 15 | -3.22 | 0.18 |
| 135 | ♂ | HF | 15 | -3.21 | 0.29 |
| 136 | ♀ | LF | 15 | -2.86 | 0.30 |
| 137 | ♂ | LF | 15 | -2.78 | 0.23 |
| 138 | ♂ | HF | 15 | -2.01 | 0.15 |
| 139 | ♀ | LF | 15 | -1.31 | 0.29 |
| 140 | ♂ | HF | 15 | -1.26 | 0.17 |
| 141 | ♀ | LF | 15 | -1.07 | 0.20 |
| 142 | ♀ | HF | 15 | -0.97 | 0.26 |
| 143 | ♂ | HF | 15 | -0.88 | 0.19 |
| 144 | ♀ | LF | 15 | -0.88 | 0.23 |
| 145 | ♀ | LF | 15 | -0.40 | 0.21 |
| 146 | ♂ | LF | 15 | -0.29 | 0.19 |
| 147 | ♂ | HF | 15 | -0.29 | 0.26 |
| 148 | ♂ | LF | 15 | -0.23 | 0.18 |
| 149 | ♀ | LF | 15 | 0.03  | 0.24 |
| 150 | ♂ | LF | 15 | 0.13  | 0.20 |
| 151 | ♂ | LF | 15 | 0.18  | 0.21 |
| 152 | ♀ | LF | 15 | 0.22  | 0.25 |
| 153 | ♂ | LF | 15 | 0.28  | 0.20 |
| 154 | ♂ | LF | 15 | 0.38  | 0.19 |
| 155 | ♀ | HF | 15 | 0.51  | 0.26 |
| 156 | ♂ | LF | 15 | 0.71  | 0.28 |
| 157 | ♂ | HF | 15 | 0.74  | 0.25 |
| 158 | ♀ | HF | 15 | 0.93  | 0.26 |
| 159 | ♂ | HF | 15 | 1.21  | 0.26 |
| 160 | ♀ | LF | 18 | -2.91 | 0.26 |
| 161 | ♀ | LF | 18 | -2.54 | 0.20 |
| 162 | ♂ | LF | 18 | -2.17 | 0.26 |
| 163 | ♀ | LF | 18 | -1.85 | 0.22 |
| 164 | ♀ | LF | 18 | -1.21 | 0.20 |

|     |   |    |    |       |      |
|-----|---|----|----|-------|------|
| 165 | ♀ | LF | 18 | -1.10 | 0.25 |
| 166 | ♀ | LF | 18 | -0.87 | 0.21 |
| 167 | ♀ | LF | 18 | 0.04  | 0.18 |
| 168 | ♀ | HF | 18 | 0.18  | 0.31 |
| 169 | ♀ | HF | 18 | 0.30  | 0.29 |
| 170 | ♂ | HF | 18 | 0.38  | 0.24 |
| 171 | ♂ | LF | 18 | 0.50  | 0.28 |
| 172 | ♀ | HF | 18 | 0.52  | 0.30 |
| 173 | ♀ | LF | 18 | 0.56  | 0.27 |
| 174 | ♀ | LF | 18 | 0.68  | 0.26 |
| 175 | ♂ | LF | 18 | 0.84  | 0.25 |
| 176 | ♂ | LF | 18 | 0.95  | 0.25 |
| 177 | ♂ | HF | 18 | 1.81  | 0.38 |
| 178 | ♀ | HF | 18 | 1.88  | 0.28 |
| 179 | ♀ | HF | 18 | 1.99  | 0.32 |
| 180 | ♂ | LF | 18 | 2.11  | 0.28 |
| 181 | ♀ | HF | 18 | 2.43  | 0.35 |
| 182 | ♂ | HF | 18 | 2.53  | 0.27 |
| 183 | ♂ | HF | 18 | 2.81  | 0.35 |
| 184 | ♂ | HF | 18 | 3.93  | 0.41 |
| 185 | ♂ | HF | 18 | 4.04  | 0.37 |
| 186 | ♂ | LF | 18 | 4.66  | 0.45 |
| 187 | ♂ | HF | 18 | 5.84  | 0.46 |
| 188 | ♂ | HF | 19 | -3.57 | 0.23 |
| 189 | ♂ | LF | 19 | -3.02 | 0.20 |
| 190 | ♀ | LF | 19 | -1.75 | 0.25 |
| 191 | ♂ | LF | 19 | -1.73 | 0.24 |
| 192 | ♂ | LF | 19 | -1.37 | 0.21 |
| 193 | ♂ | HF | 19 | -0.60 | 0.22 |
| 194 | ♀ | LF | 19 | -0.56 | 0.23 |
| 195 | ♀ | LF | 19 | -0.40 | 0.23 |
| 196 | ♀ | LF | 19 | -0.16 | 0.28 |
| 197 | ♂ | LF | 19 | -0.14 | 0.17 |
| 198 | ♂ | LF | 19 | 0.05  | 0.23 |
| 199 | ♂ | HF | 19 | 0.42  | 0.24 |
| 200 | ♂ | HF | 19 | 0.43  | 0.25 |
| 201 | ♂ | HF | 19 | 0.45  | 0.26 |
| 202 | ♀ | HF | 19 | 0.74  | 0.28 |
| 203 | ♂ | HF | 19 | 0.75  | 0.27 |
| 204 | ♀ | LF | 19 | 0.75  | 0.23 |
| 205 | ♀ | HF | 19 | 0.76  | 0.30 |
| 206 | ♂ | HF | 19 | 0.82  | 0.30 |

|     |   |    |    |       |      |
|-----|---|----|----|-------|------|
| 207 | ♀ | LF | 19 | 0.83  | 0.29 |
| 208 | ♀ | HF | 19 | 0.99  | 0.31 |
| 209 | ♂ | LF | 19 | 1.24  | 0.29 |
| 210 | ♀ | HF | 19 | 1.27  | 0.28 |
| 211 | ♀ | HF | 19 | 1.36  | 0.36 |
| 212 | ♀ | HF | 19 | 1.49  | 0.21 |
| 213 | ♀ | LF | 19 | 1.64  | 0.33 |
| 214 | ♀ | HF | 19 | 1.82  | 0.34 |
| 215 | ♂ | HF | 19 | 1.89  | 0.27 |
| 216 | ♂ | LF | 19 | 2.07  | 0.24 |
| 217 | ♂ | LF | 19 | 2.27  | 0.31 |
| 218 | ♂ | LF | 19 | 3.83  | 0.29 |
| 219 | ♀ | LF | 20 | -4.30 | 0.18 |
| 220 | ♂ | HF | 20 | -4.26 | 0.52 |
| 221 | ♂ | LF | 20 | -3.70 | 0.18 |
| 222 | ♀ | LF | 20 | -3.41 | 0.16 |
| 223 | ♂ | LF | 20 | -3.27 | 0.15 |
| 224 | ♀ | HF | 20 | -1.95 | 0.22 |
| 225 | ♂ | HF | 20 | -1.43 | 0.15 |
| 226 | ♂ | HF | 20 | -1.14 | 0.13 |
| 227 | ♂ | HF | 20 | -0.99 | 0.15 |
| 228 | ♀ | LF | 20 | -0.93 | 0.14 |
| 229 | ♀ | HF | 20 | -0.69 | 0.22 |
| 230 | ♀ | LF | 20 | -0.30 | 0.39 |
| 231 | ♂ | LF | 20 | 0.49  | 0.17 |
| 232 | ♀ | LF | 20 | 0.63  | 0.45 |
| 233 | ♂ | LF | 20 | 2.16  | 0.32 |
| 234 | ♂ | LF | 20 | 5.17  | 0.42 |
| 235 | ♀ | LF | 22 | -4.83 | 0.32 |
| 236 | ♀ | LF | 22 | -2.18 | 0.24 |
| 237 | ♂ | LF | 22 | -2.00 | 0.12 |
| 238 | ♂ | HF | 22 | -0.77 | 0.47 |
| 239 | ♀ | LF | 22 | -0.74 | 0.28 |
| 240 | ♂ | LF | 22 | -0.37 | 0.22 |
| 241 | ♀ | HF | 22 | -0.25 | 0.28 |
| 242 | ♀ | LF | 22 | -0.16 | 0.25 |
| 243 | ♂ | HF | 22 | 0.12  | 0.45 |
| 244 | ♀ | LF | 22 | 0.28  | 0.38 |
| 245 | ♂ | LF | 22 | 0.36  | 0.40 |
| 246 | ♂ | LF | 22 | 0.61  | 0.22 |
| 247 | ♀ | HF | 22 | 0.92  | 0.47 |
| 248 | ♂ | LF | 22 | 1.31  | 0.28 |

|     |   |    |    |       |      |
|-----|---|----|----|-------|------|
| 249 | ♂ | LF | 22 | 1.43  | 0.27 |
| 250 | ♀ | LF | 22 | 1.60  | 0.27 |
| 251 | ♀ | HF | 22 | 1.67  | 0.45 |
| 252 | ♂ | LF | 22 | 1.85  | 0.26 |
| 253 | ♂ | HF | 22 | 2.04  | 0.50 |
| 254 | ♀ | LF | 22 | 2.21  | 0.31 |
| 255 | ♂ | LF | 22 | 2.30  | 0.32 |
| 256 | ♀ | LF | 22 | 2.46  | 0.30 |
| 257 | ♀ | LF | 22 | 2.57  | 0.35 |
| 258 | ♂ | HF | 22 | 2.88  | 0.43 |
| 259 | ♀ | HF | 22 | 2.96  | 0.35 |
| 260 | ♂ | HF | 22 | 3.16  | 0.50 |
| 261 | ♀ | LF | 22 | 3.21  | 0.36 |
| 262 | ♀ | HF | 22 | 3.39  | 0.46 |
| 263 | ♂ | HF | 22 | 3.41  | 0.48 |
| 264 | ♀ | HF | 22 | 3.62  | 0.37 |
| 265 | ♂ | HF | 22 | 3.65  | 0.34 |
| 266 | ♀ | LF | 22 | 3.80  | 0.38 |
| 267 | ♀ | LF | 22 | 3.81  | 0.42 |
| 268 | ♀ | HF | 22 | 3.99  | 0.39 |
| 269 | ♀ | HF | 22 | 4.18  | 0.42 |
| 270 | ♀ | HF | 22 | 4.77  | 0.44 |
| 271 | ♀ | HF | 22 | 4.78  | 0.41 |
| 272 | ♂ | HF | 22 | 4.93  | 0.48 |
| 273 | ♂ | HF | 22 | 5.39  | 0.49 |
| 274 | ♀ | HF | 22 | 5.47  | 0.44 |
| 275 | ♀ | HF | 22 | 5.52  | 0.45 |
| 276 | ♂ | HF | 22 | 5.54  | 0.44 |
| 277 | ♂ | HF | 22 | 6.00  | 0.49 |
| 278 | ♂ | HF | 22 | 6.23  | 0.50 |
| 279 | ♀ | HF | 23 | -2.82 | 0.27 |
| 280 | ♂ | LF | 23 | -2.57 | 0.14 |
| 281 | ♂ | HF | 23 | -2.48 | 0.25 |
| 282 | ♂ | HF | 23 | -2.32 | 0.20 |
| 283 | ♀ | LF | 23 | -2.10 | 0.19 |
| 284 | ♀ | LF | 23 | -1.91 | 0.23 |
| 285 | ♀ | LF | 23 | -1.86 | 0.32 |
| 286 | ♀ | LF | 23 | -1.79 | 0.25 |
| 287 | ♀ | LF | 23 | -1.63 | 0.17 |
| 288 | ♀ | HF | 23 | -1.29 | 0.16 |
| 289 | ♂ | LF | 23 | -0.92 | 0.20 |
| 290 | ♂ | LF | 23 | -0.82 | 0.22 |

|     |   |    |    |       |      |
|-----|---|----|----|-------|------|
| 291 | ♂ | LF | 23 | -0.51 | 0.22 |
| 292 | ♂ | HF | 23 | -0.43 | 0.20 |
| 293 | ♂ | HF | 23 | -0.27 | 0.17 |
| 294 | ♂ | HF | 23 | 0.11  | 0.28 |
| 295 | ♂ | LF | 23 | 0.13  | 0.23 |
| 296 | ♂ | HF | 23 | 0.18  | 0.37 |
| 297 | ♀ | LF | 23 | 0.58  | 0.28 |
| 298 | ♂ | HF | 23 | 0.61  | 0.25 |
| 299 | ♂ | HF | 23 | 0.71  | 0.20 |
| 300 | ♀ | LF | 23 | 0.79  | 0.28 |
| 301 | ♂ | LF | 23 | 0.82  | 0.24 |
| 302 | ♂ | LF | 23 | 0.84  | 0.25 |
| 303 | ♀ | LF | 23 | 1.13  | 0.28 |
| 304 | ♂ | HF | 23 | 1.17  | 0.28 |
| 305 | ♂ | LF | 23 | 1.46  | 0.28 |
| 306 | ♀ | HF | 23 | 2.00  | 0.30 |
| 307 | ♂ | LF | 23 | 2.43  | 0.28 |
| 308 | ♂ | LF | 23 | 2.45  | 0.24 |
| 309 | ♂ | HF | 23 | 2.46  | 0.31 |
| 310 | ♀ | LF | 23 | 2.52  | 0.27 |
| 311 | ♀ | HF | 23 | 2.70  | 0.32 |
| 312 | ♂ | LF | 23 | 3.46  | 0.29 |
| 313 | ♀ | HF | 23 | 3.53  | 0.36 |
| 314 | ♂ | LF | 23 | 3.88  | 0.28 |
| 315 | ♀ | HF | 23 | 3.91  | 0.37 |
| 316 | ♀ | HF | 23 | 4.03  | 0.36 |
| 317 | ♀ | LF | 31 | -5.26 | 0.19 |
| 318 | ♀ | HF | 31 | -3.34 | 0.31 |
| 319 | ♂ | HF | 31 | -0.59 | 0.21 |
| 320 | ♀ | HF | 31 | 0.05  | 0.22 |
| 321 | ♂ | LF | 31 | 0.48  | 0.29 |
| 322 | ♂ | HF | 31 | 1.02  | 0.32 |
| 323 | ♂ | HF | 31 | 1.03  | 0.24 |
| 324 | ♀ | HF | 31 | 1.04  | 0.32 |
| 325 | ♂ | HF | 31 | 1.21  | 0.24 |
| 326 | ♀ | HF | 31 | 1.42  | 0.25 |
| 327 | ♂ | LF | 31 | 1.96  | 0.27 |
| 328 | ♂ | HF | 31 | 3.27  | 0.29 |
| 329 | ♂ | LF | 33 | -2.79 | 0.21 |
| 330 | ♀ | LF | 33 | -2.35 | 0.18 |
| 331 | ♂ | HF | 33 | -1.71 | 0.18 |
| 332 | ♂ | LF | 33 | -0.45 | 0.23 |



|     |   |    |    |       |      |
|-----|---|----|----|-------|------|
| 333 | ♀ | LF | 33 | -0.34 | 0.25 |
| 334 | ♀ | LF | 33 | -0.26 | 0.24 |
| 335 | ♀ | LF | 33 | -0.23 | 0.25 |
| 336 | ♀ | LF | 33 | -0.13 | 0.25 |
| 337 | ♀ | LF | 33 | 0.11  | 0.20 |
| 338 | ♂ | LF | 33 | 0.12  | 0.22 |
| 339 | ♂ | HF | 33 | 0.14  | 0.34 |
| 340 | ♂ | HF | 33 | 0.35  | 0.27 |
| 341 | ♀ | LF | 33 | 0.85  | 0.27 |
| 342 | ♂ | HF | 33 | 1.15  | 0.30 |
| 343 | ♂ | HF | 33 | 1.18  | 0.28 |
| 344 | ♂ | HF | 33 | 1.64  | 0.30 |
| 345 | ♂ | HF | 33 | 1.77  | 0.25 |
| 346 | ♂ | LF | 33 | 2.04  | 0.25 |
| 347 | ♀ | HF | 33 | 2.19  | 0.29 |
| 348 | ♀ | HF | 33 | 2.87  | 0.39 |
| 349 | ♂ | LF | 33 | 3.04  | 0.27 |
| 350 | ♀ | HF | 33 | 3.72  | 0.52 |
| 351 | ♀ | HF | 33 | 4.02  | 0.40 |
| 352 | ♀ | LF | 35 | -3.02 | 0.16 |
| 353 | ♀ | LF | 35 | -2.36 | 0.17 |
| 354 | ♂ | LF | 35 | -2.26 | 0.29 |
| 355 | ♂ | HF | 35 | -2.13 | 0.26 |
| 356 | ♀ | HF | 35 | -2.02 | 0.26 |
| 357 | ♀ | LF | 35 | -1.95 | 0.21 |
| 358 | ♀ | HF | 35 | -1.41 | 0.27 |
| 359 | ♀ | HF | 35 | -1.25 | 0.28 |
| 360 | ♀ | HF | 35 | -0.70 | 0.19 |
| 361 | ♂ | LF | 35 | -0.46 | 0.18 |
| 362 | ♂ | HF | 35 | -0.45 | 0.46 |
| 363 | ♀ | LF | 35 | -0.43 | 0.19 |
| 364 | ♀ | LF | 35 | -0.21 | 0.22 |
| 365 | ♂ | LF | 35 | 0.03  | 0.21 |
| 366 | ♀ | LF | 35 | 0.05  | 0.22 |
| 367 | ♂ | LF | 35 | 0.06  | 0.19 |
| 368 | ♀ | LF | 35 | 0.41  | 0.22 |
| 369 | ♂ | LF | 35 | 0.43  | 0.23 |
| 370 | ♂ | LF | 35 | 0.51  | 0.24 |
| 371 | ♂ | HF | 35 | 0.70  | 0.44 |
| 372 | ♀ | HF | 35 | 0.73  | 0.30 |
| 373 | ♂ | HF | 35 | 0.88  | 0.27 |
| 374 | ♂ | LF | 35 | 1.01  | 0.23 |

|     |   |    |    |       |      |
|-----|---|----|----|-------|------|
| 375 | ♂ | LF | 35 | 1.34  | 0.28 |
| 376 | ♀ | HF | 35 | 1.94  | 0.27 |
| 377 | ♂ | HF | 35 | 2.26  | 0.26 |
| 378 | ♂ | HF | 35 | 3.99  | 0.36 |
| 379 | ♀ | HF | 38 | -6.51 | 0.20 |
| 380 | ♀ | HF | 38 | -5.45 | 0.25 |
| 381 | ♀ | HF | 38 | -5.26 | 0.24 |
| 382 | ♂ | HF | 38 | -3.57 | 0.13 |
| 383 | ♂ | LF | 38 | -3.28 | 0.21 |
| 384 | ♂ | LF | 38 | -3.18 | 0.15 |
| 385 | ♀ | LF | 38 | -2.69 | 0.22 |
| 386 | ♀ | HF | 38 | -2.67 | 0.23 |
| 387 | ♂ | LF | 38 | -2.29 | 0.14 |
| 388 | ♀ | LF | 38 | -2.00 | 0.20 |
| 389 | ♂ | LF | 38 | -1.65 | 0.18 |
| 390 | ♂ | HF | 38 | -1.28 | 0.13 |
| 391 | ♂ | LF | 38 | -1.24 | 0.21 |
| 392 | ♂ | HF | 38 | -1.03 | 0.16 |
| 393 | ♀ | LF | 38 | -0.95 | 0.18 |
| 394 | ♀ | LF | 38 | -0.76 | 0.30 |
| 395 | ♀ | LF | 38 | -0.74 | 0.22 |
| 396 | ♂ | HF | 38 | -0.64 | 0.21 |
| 397 | ♀ | LF | 38 | -0.61 | 0.21 |
| 398 | ♂ | HF | 38 | -0.51 | 0.21 |
| 399 | ♂ | LF | 38 | -0.51 | 0.14 |
| 400 | ♂ | HF | 38 | -0.41 | 0.22 |
| 401 | ♂ | LF | 38 | -0.24 | 0.18 |
| 402 | ♀ | HF | 38 | 0.00  | 0.26 |
| 403 | ♀ | LF | 38 | 0.44  | 0.25 |
| 404 | ♀ | HF | 38 | 0.48  | 0.28 |
| 405 | ♂ | HF | 38 | 0.81  | 0.20 |
| 406 | ♂ | LF | 38 | 0.83  | 0.17 |
| 407 | ♀ | HF | 38 | 0.95  | 0.33 |
| 408 | ♀ | LF | 38 | 1.11  | 0.27 |
| 409 | ♀ | LF | 45 | -5.40 | 0.24 |
| 410 | ♀ | HF | 45 | -5.32 | 0.26 |
| 411 | ♀ | HF | 45 | -1.70 | 0.29 |
| 412 | ♀ | LF | 45 | -1.20 | 0.22 |
| 413 | ♀ | LF | 45 | -0.41 | 0.28 |
| 414 | ♀ | LF | 45 | -0.31 | 0.28 |
| 415 | ♀ | HF | 45 | 1.53  | 0.30 |
| 416 | ♀ | LF | 45 | 1.54  | 0.33 |

|     |   |    |    |       |      |
|-----|---|----|----|-------|------|
| 417 | ♂ | HF | 45 | 1.97  | 0.32 |
| 418 | ♀ | HF | 45 | 1.98  | 0.27 |
| 419 | ♂ | LF | 45 | 2.05  | 0.29 |
| 420 | ♂ | LF | 45 | 2.13  | 0.34 |
| 421 | ♂ | HF | 45 | 2.92  | 0.31 |
| 422 | ♂ | HF | 45 | 3.27  | 0.29 |
| 423 | ♂ | LF | 45 | 3.34  | 0.32 |
| 424 | ♀ | HF | 45 | 3.79  | 0.34 |
| 425 | ♀ | HF | 46 | -6.92 | 0.19 |
| 426 | ♂ | LF | 46 | -4.20 | 0.17 |
| 427 | ♀ | LF | 46 | -3.88 | 0.16 |
| 428 | ♀ | LF | 46 | -2.90 | 0.13 |
| 429 | ♀ | LF | 46 | -2.04 | 0.21 |
| 430 | ♀ | HF | 46 | -1.53 | 0.14 |
| 431 | ♂ | HF | 46 | -1.33 | 0.18 |
| 432 | ♂ | HF | 46 | -0.57 | 0.27 |
| 433 | ♀ | LF | 46 | -0.56 | 0.19 |
| 434 | ♂ | LF | 46 | -0.44 | 0.17 |
| 435 | ♀ | LF | 46 | -0.32 | 0.25 |
| 436 | ♀ | HF | 46 | -0.29 | 0.19 |
| 437 | ♂ | HF | 46 | -0.28 | 0.18 |
| 438 | ♀ | LF | 46 | 0.02  | 0.22 |
| 439 | ♀ | LF | 46 | 0.05  | 0.26 |
| 440 | ♂ | LF | 46 | 0.09  | 0.19 |
| 441 | ♂ | LF | 46 | 0.17  | 0.23 |
| 442 | ♀ | LF | 46 | 0.46  | 0.23 |
| 443 | ♀ | HF | 46 | 0.56  | 0.31 |
| 444 | ♂ | HF | 46 | 0.93  | 0.17 |
| 445 | ♂ | LF | 46 | 1.28  | 0.30 |
| 446 | ♂ | HF | 46 | 1.44  | 0.29 |
| 447 | ♂ | LF | 46 | 1.54  | 0.26 |
| 448 | ♂ | HF | 46 | 1.55  | 0.33 |
| 449 | ♂ | LF | 46 | 1.55  | 0.28 |
| 450 | ♂ | LF | 46 | 1.68  | 0.28 |
| 451 | ♀ | HF | 46 | 3.17  | 0.34 |
| 452 | ♀ | LF | 48 | -5.10 | 0.16 |
| 453 | ♀ | HF | 48 | -4.85 | 0.20 |
| 454 | ♀ | LF | 48 | -3.12 | 0.17 |
| 455 | ♂ | LF | 48 | -2.75 | 0.16 |
| 456 | ♀ | LF | 48 | -1.33 | 0.16 |
| 457 | ♀ | LF | 48 | -1.17 | 0.18 |
| 458 | ♂ | LF | 48 | -1.04 | 0.18 |

|     |   |    |    |       |      |
|-----|---|----|----|-------|------|
| 459 | ♂ | LF | 48 | -0.65 | 0.25 |
| 460 | ♂ | LF | 48 | -0.43 | 0.20 |
| 461 | ♀ | HF | 48 | -0.08 | 0.31 |
| 462 | ♀ | LF | 48 | 0.04  | 0.25 |
| 463 | ♀ | LF | 48 | 0.50  | 0.29 |
| 464 | ♂ | LF | 48 | 0.53  | 0.21 |
| 465 | ♀ | LF | 48 | 0.55  | 0.26 |
| 466 | ♀ | LF | 48 | 0.64  | 0.23 |
| 467 | ♀ | LF | 48 | 0.66  | 0.31 |
| 468 | ♂ | LF | 48 | 1.24  | 0.30 |
| 469 | ♀ | HF | 48 | 2.12  | 0.39 |
| 470 | ♂ | HF | 48 | 2.97  | 0.35 |
| 471 | ♀ | HF | 48 | 3.17  | 0.41 |
| 472 | ♂ | HF | 48 | 3.43  | 0.40 |
| 473 | ♂ | HF | 48 | 3.57  | 0.45 |
| 474 | ♂ | HF | 48 | 3.98  | 0.46 |
| 475 | ♂ | HF | 48 | 4.14  | 0.41 |
| 476 | ♂ | HF | 48 | 5.94  | 0.46 |
| 477 | ♀ | HF | 48 | 5.95  | 0.43 |
| 478 | ♀ | HF | 48 | 6.23  | 0.48 |
| 479 | ♂ | HF | 48 | 6.78  | 0.50 |

---

♀ = female, ♂ = male, HF = high fat diet, LF = low fat diet, Fattiness = residuals of liver fat mass regressed onto lean mass, Fat Content = ratio of liver fat mass to total liver mass. Strain numbers are prefaced by LGXSM-, except strains Large (LG/J) and Small (SM/J).
