# Supplementary material for: Quantitative Trait Loci Affecting Liver Fat Content in Mice
Source: PubMed Central journal article supplement (PMC3429915; doi:10.1534/g3.112.003343), 2012-09-01
Supplement: supp_2.9.1019_TableS3.pdf [file supp_2.9.1019_TableS3.pdf]

**Table S3 SNP genotypes by strain and chromosome (CHR).**

| CHR | SNP                | SM/J | LG/J | 4  | 5  | 10 | 15 | 18 | 19 | 20 |
|-----|--------------------|------|------|----|----|----|----|----|----|----|
| 1   | rs3683945          | SS   | LL   | LL | SS | LL | LL | LL | SS | LL |
| 1   | rs13475748         | SS   | LL   | LL | SS | LL | LL | LL | LL | LL |
| 1   | rs13475774         | SS   | LL   | LL | LL | LL | LL | LL | LL | LL |
| 1   | rs13475816         | SS   | LL   | LL | LL | LL | LL | LL | LL | LL |
| 1   | rs3685569          | SS   | LL   | LL | LL | LL | LL | LL | LL | LL |
| 1   | gnf01.037.906      | SS   | LL   | LL | LL | SS | LL | LL | LL | LL |
| 1   | rs3663706          | SS   | LL   | LL | SS | SS | LL | LL | LL | LL |
| 1   | rs13475837         | SS   | LL   | LL | LL | SS | LL | LL | LL | LL |
| 1   | rs13475863         | SS   | LL   | LL | LL | SS | LL | LL | LL | LL |
| 1   | rs13475874         | SS   | LL   | LL | LL | SS | LL | LL | LL | LL |
| 1   | petAF067836-350A-1 | SS   | LL   | LL | LL | SS | LL | LL | LL | LL |
| 1   | rs13475894         | SS   | LL   | LL | LL | SS | LL | LL | LL | LL |
| 1   | rs13475902         | SS   | LL   | LL | LL | LL | LL | LL | LL | LL |
| 1   | rs13475903         | SS   | LL   | LL | LL | LL | LL | LL | LL | LL |
| 1   | rs13475931         | SS   | LL   | LL | LL | LL | LL | LL | LL | LL |
| 1   | rs3667200          | SS   | LL   | LL | LL | LL | LL | LL | LL | LL |
| 1   | rs13475970         | SS   | LL   | LL | LL | SS | LL | LL | LL | LL |
| 1   | rs3664800          | SS   | LL   | LL | LL | SS | LL | LL | LL | SS |
| 1   | rs6342650          | SS   | LL   | LL | LL | LL | LL | LL | LL | SS |
| 1   | rs13476036         | SS   | LL   | LL | LL | LL | LL | LL | LL | SS |
| 1   | mCV22824651        | SS   | LL   | LL | LL | LL | LL | SS | LL | SS |
| 1   | rs3719973          | SS   | LL   | LL | LL | LL | LL | SS | LL | SS |
| 1   | rs3686671          | SS   | LL   | LL | LL | LL | LL | LL | LL | LL |
| 1   | rs3691374          | SS   | LL   | LL | LL | LL | LL | LL | LL | LL |
| 1   | rs13476122         | SS   | LL   | LL | SS | LL | LL | LL | LL | LL |
| 1   | rs13476125         | SS   | LL   | NA | SS | LL | LL | LL | LL | LL |
| 1   | rs6250257          | SS   | LL   | NA | SS | LL | LL | LL | SS | LL |
| 1   | rs13476136         | SS   | LL   | NA | SS | LL | LL | LL | SS | LL |
| 1   | rs6186115          | SS   | LL   | NA | SS | LL | LL | LL | SS | LL |
| 1   | gnf01.157.188      | SS   | LL   | LL | SS | LL | LL | SS | SS | LL |
| 1   | rs13476211         | SS   | LL   | LL | SS | LL | LL | SS | SS | SS |
| 1   | rs8256589          | SS   | LL   | LL | SS | LL | LL | SS | SS | SS |
| 1   | rs8242852          | SS   | LL   | LL | SS | LL | LL | SS | SS | LL |
| 1   | rs13476248         | SS   | LL   | LL | SS | LL | LL | SS | SS | LL |
| 1   | rs3723788          | SS   | LL   | LL | LL | LL | LL | SS | SS | LL |
| 1   | mCV23509126        | SS   | LL   | LL | SS | LL | LL | SS | SS | LL |
| 1   | rs6157620          | SS   | LL   | LL | SS | LL | LL | SS | SS | LL |
| 1   | rs13476286         | SS   | LL   | LL | SS | LL | LL | SS | SS | SS |

|   |                |    |    |    |    |    |    |    |    |    |
|---|----------------|----|----|----|----|----|----|----|----|----|
| 1 | rs13476293     | SS | LL | SS | LL | LL | LL | SS | SS | SS |
| 1 | rs13476308     | SS | LL | SS | SS | LL | LL | SS | SS | SS |
| 2 | rs13476319     | SS | LL | SS | LL | LL | LL | LL | SS | SS |
| 2 | rs6359983      | SS | LL | SS | LL | LL | LL | LL | SS | SS |
| 2 | gnf02.007.482  | SS | LL | SS | LL | LL | LL | LL | LL | SS |
| 2 | rs3688854      | SS | LL | LL | SS | SS | LL | LL | LL | SS |
| 2 | mCV23209429    | SS | LL | LL | SS | SS | LL | SS | LL | SS |
| 2 | rs13476425     | SS | LL | LL | SS | SS | LL | SS | LL | SS |
| 2 | rs6313371      | SS | LL | LL | SS | SS | LL | SS | LL | SS |
| 2 | rs3680197      | SS | LL | LL | SS | SS | LL | SS | SS | SS |
| 2 | rs3718711      | SS | LL | LL | SS | SS | LL | SS | LL | SS |
| 2 | rs3022886      | SS | LL | LL | SS | SS | LL | LL | LL | SS |
| 2 | rs8263587      | SS | LL | LL | SS | LL | SS | LL | LL | SS |
| 2 | rs6295014      | SS | LL | LL | SS | LL | LL | LL | SS | SS |
| 2 | rs3710094      | SS | LL | LL | SS | LL | LL | LL | LL | SS |
| 2 | CEL-2_79237503 | SS | LL | LL | LL | LL | LL | LL | LL | SS |
| 2 | rs13476598     | SS | LL | LL | LL | LL | LL | LL | LL | SS |
| 2 | rs13476637     | SS | LL | LL | LL | LL | LL | LL | LL | SS |
| 2 | rs13476647     | SS | LL | LL | LL | LL | LL | LL | LL | SS |
| 2 | rs6406705      | SS | LL | LL | LL | LL | LL | LL | LL | SS |
| 2 | rs6208879      | SS | LL | LL | LL | LL | LL | LL | LL | SS |
| 2 | rs13476723     | SS | LL | LL | LL | LL | LL | LL | LL | SS |
| 2 | rs3725853      | SS | LL | LL | SS | LL | LL | LL | LL | SS |
| 2 | rs13476761     | SS | LL | LL | SS | LL | LL | LL | LL | SS |
| 2 | rs13476787     | SS | LL | LL | SS | LL | LL | LL | LL | SS |
| 2 | rs6249968      | SS | LL | LL | SS | LL | LL | LL | LL | SS |
| 2 | mCV23169908    | SS | LL | SS | SS | LL | LL | LL | LL | SS |
| 2 | rs3676033      | SS | LL | LL | SS | LL | LL | LL | LL | SS |
| 2 | rs13476846     | SS | LL | LL | LL | LL | LL | LL | LL | SS |
| 2 | rs6209403      | SS | LL | LL | LL | LL | LL | LL | LL | SS |
| 2 | rs6315439      | SS | LL | LL | LL | LL | LL | LL | LL | LL |
| 2 | rs13476860     | SS | LL | LL | LL | LL | LL | LL | LL | SS |
| 2 | gnf02.161.674  | SS | LL | LL | SS | LL | LL | LL | LL | SS |
| 2 | rs6204920      | SS | LL | LL | SS | LL | LL | LL | LL | SS |
| 2 | rs3673613      | SS | LL | LL | SS | LL | LL | LL | LL | SS |
| 2 | rs13476894     | SS | LL | LL | LL | LL | LL | LL | LL | SS |
| 2 | rs6160839      | SS | LL | LL | LL | LL | SS | LL | LL | SS |
| 2 | rs13476925     | SS | LL | SS | LL | LL | SS | LL | LL | SS |
| 2 | rs8238755      | SS | LL | SS | LL | LL | SS | LL | LL | SS |
| 2 | rs13476936     | SS | LL | LL | LL | LL | SS | LL | LL | SS |
| 3 | rs13476950     | SS | LL | LL | SS | LL | LL | SS | SS | SS |
| 3 | rs13477017     | SS | LL | LL | SS | SS | LL | SS | SS | SS |

|   |                 |    |    |    |    |    |    |    |    |    |
|---|-----------------|----|----|----|----|----|----|----|----|----|
| 3 | rs3677132       | SS | LL | LL | SS | SS | LL | LL | LL | SS |
| 3 | CEL-3_31146697  | SS | LL | LL | SS | SS | LL | SS | LL | LL |
| 3 | rs6351323       | SS | LL | LL | SS | SS | LL | SS | LL | LL |
| 3 | rs3720738       | SS | LL | LL | SS | LL | LL | SS | LL | LL |
| 3 | rs13477066      | SS | LL | LL | SS | SS | LL | SS | LL | LL |
| 3 | rs6335414       | SS | LL | SS | SS | SS | LL | SS | SS | LL |
| 3 | rs13477178      | SS | LL | SS | SS | SS | LL | SS | SS | LL |
| 3 | rs3659688       | SS | LL | SS | SS | SS | LL | SS | SS | LL |
| 3 | gnf03.073.308   | SS | LL | SS | SS | SS | LL | LL | SS | LL |
| 3 | rs3659866       | SS | LL | SS | SS | LL | LL | LL | SS | LL |
| 3 | rs13477230      | SS | LL | SS | SS | LL | LL | LL | SS | LL |
| 3 | rs6243021       | SS | LL | SS | SS | LL | LL | LL | SS | LL |
| 3 | rs13477242      | SS | LL | SS | SS | LL | LL | LL | SS | LL |
| 3 | rs13475064      | SS | LL | SS | SS | LL | LL | LL | SS | SS |
| 3 | rs13477254      | SS | LL | SS | SS | LL | LL | LL | LL | SS |
| 3 | rs13459185      | SS | LL | SS | SS | LL | LL | LL | LL | SS |
| 3 | rs3671622       | SS | LL | SS | SS | LL | SS | LL | LL | SS |
| 3 | rs8256683       | SS | LL | SS | LL | LL | SS | LL | LL | SS |
| 3 | gnf03.117.090   | SS | LL | LL | LL | LL | SS | LL | LL | SS |
| 3 | rs13477355      | SS | LL | SS | LL | LL | SS | LL | LL | SS |
| 3 | rs13477379      | SS | LL | SS | LL | LL | SS | LL | LL | SS |
| 3 | rs3707706       | SS | LL | SS | LL | LL | LL | LL | LL | SS |
| 3 | rs13477391      | SS | LL | SS | SS | LL | LL | LL | LL | SS |
| 3 | rs3658914       | SS | LL | SS | SS | SS | LL | LL | LL | SS |
| 3 | rs13477410      | SS | LL | SS | SS | SS | LL | LL | LL | SS |
| 3 | rs13477421      | SS | LL | SS | SS | LL | LL | LL | LL | SS |
| 3 | CEL-3_137067761 | SS | LL | SS | SS | LL | LL | LL | LL | SS |
| 3 | rs13477529      | SS | LL | SS | SS | LL | LL | LL | LL | SS |
| 3 | rs13477477      | SS | LL | SS | SS | LL | LL | LL | LL | SS |
| 3 | rs3695386       | SS | LL | SS | SS | LL | LL | LL | SS | SS |
| 4 | rs13477541      | SS | LL | LL | LL | SS | LL | SS | SS | SS |
| 4 | rs13477546      | SS | LL | SS | LL | SS | LL | SS | SS | SS |
| 4 | rs6324271       | SS | LL | SS | LL | SS | LL | SS | SS | SS |
| 4 | rs13477576      | SS | LL | SS | SS | SS | LL | SS | SS | SS |
| 4 | rs13477595      | SS | LL | SS | SS | LL | LL | SS | SS | SS |
| 4 | rs13477623      | SS | LL | SS | SS | SS | LL | SS | SS | SS |
| 4 | rs3719299       | SS | LL | SS | SS | SS | LL | SS | LL | SS |
| 4 | rs3684104       | SS | LL | LL | SS | SS | LL | SS | LL | SS |
| 4 | rs13477678      | SS | LL | LL | SS | SS | LL | SS | LL | LL |
| 4 | rs3707178       | SS | LL | LL | SS | SS | LL | SS | LL | LL |
| 4 | rs6269326       | SS | LL | LL | SS | SS | LL | SS | LL | LL |
| 4 | rs13477711      | SS | LL | LL | SS | SS | LL | SS | LL | LL |

|   |               |    |    |    |    |    |    |    |    |    |
|---|---------------|----|----|----|----|----|----|----|----|----|
| 4 | rs13477725    | SS | LL | LL | SS | SS | LL | SS | SS | LL |
| 4 | rs6370644     | SS | LL | SS | SS | SS | LL | SS | SS | LL |
| 4 | rs13477769    | SS | LL | SS | SS | SS | LL | SS | SS | LL |
| 4 | rs6255772     | SS | LL | SS | SS | SS | LL | LL | SS | LL |
| 4 | mCV22668736   | SS | LL | SS | SS | SS | LL | LL | SS | LL |
| 4 | rs3022993     | SS | LL | SS | SS | SS | LL | LL | SS | LL |
| 4 | rs3678308     | SS | LL | SS | SS | SS | LL | LL | SS | LL |
| 4 | rs13477968    | SS | LL | SS | SS | SS | LL | LL | SS | LL |
| 4 | rs4224808     | SS | LL | SS | SS | SS | LL | LL | SS | LL |
| 4 | rs3663950     | SS | LL | SS | SS | LL | LL | LL | SS | SS |
| 4 | rs3023025     | SS | LL | SS | SS | LL | LL | SS | SS | SS |
| 4 | rs4136314     | SS | LL | SS | SS | LL | LL | SS | SS | SS |
| 4 | rs3696703     | SS | LL | SS | SS | LL | LL | LL | SS | LL |
| 5 | rs13478093    | SS | LL | SS | LL | SS | LL | LL | SS | SS |
| 5 | rs3709946     | SS | LL | SS | LL | SS | LL | LL | SS | SS |
| 5 | rs3676096     | SS | LL | LL | LL | SS | LL | LL | SS | SS |
| 5 | rs3714258     | SS | LL | LL | LL | SS | LL | LL | SS | SS |
| 5 | rs13478133    | SS | LL | LL | LL | SS | LL | LL | LL | SS |
| 5 | rs13478148    | SS | LL | LL | LL | SS | LL | LL | LL | SS |
| 5 | rs13478204    | SS | LL | SS | SS | SS | LL | LL | LL | SS |
| 5 | rs13478217    | SS | LL | SS | SS | SS | LL | LL | LL | SS |
| 5 | rs6248036     | SS | LL | LL | SS | LL | LL | LL | LL | SS |
| 5 | rs3711950     | SS | LL | LL | SS | LL | LL | LL | LL | SS |
| 5 | rs6267669     | SS | LL | SS | SS | LL | LL | LL | LL | SS |
| 5 | rs3684754     | SS | LL | SS | SS | LL | LL | LL | LL | SS |
| 5 | rs6409508     | SS | LL | SS | SS | SS | LL | LL | LL | SS |
| 5 | gnf05.069.163 | SS | LL | SS | SS | SS | LL | LL | LL | SS |
| 5 | rs6221589     | SS | LL | SS | SS | SS | LL | SS | LL | SS |
| 5 | rs3658150     | SS | LL | SS | LL | SS | LL | SS | LL | SS |
| 5 | rs13478355    | SS | LL | SS | LL | SS | LL | SS | SS | SS |
| 5 | rs13478392    | SS | LL | SS | SS | SS | LL | SS | SS | SS |
| 5 | rs3661241     | SS | LL | SS | SS | SS | LL | SS | SS | SS |
| 5 | rs13478473    | SS | LL | SS | SS | SS | LL | SS | SS | SS |
| 5 | mCV22554962   | SS | LL | SS | SS | SS | LL | SS | SS | SS |
| 5 | rs3662655     | SS | LL | SS | SS | SS | LL | LL | SS | SS |
| 5 | rs13478509    | SS | LL | SS | LL | SS | LL | LL | SS | SS |
| 5 | rs3701266     | SS | LL | SS | LL | SS | LL | SS | SS | SS |
| 5 | rs13478522    | SS | LL | SS | LL | SS | LL | SS | SS | SS |
| 5 | rs6377710     | SS | LL | LL | LL | SS | LL | LL | SS | SS |
| 5 | rs13478540    | SS | LL | LL | LL | LL | LL | SS | SS | SS |
| 5 | rs3711751     | SS | LL | LL | LL | LL | LL | SS | SS | SS |
| 5 | rs3023061     | SS | LL | LL | LL | SS | SS | LL | LL | SS |

|   |                 |    |    |    |    |    |    |    |    |    |
|---|-----------------|----|----|----|----|----|----|----|----|----|
| 5 | mCV25009162     | SS | LL | LL | LL | SS | LL | LL | LL | SS |
| 5 | rs13478589      | SS | LL | LL | LL | SS | LL | SS | LL | SS |
| 5 | rs3718776       | SS | LL | LL | LL | SS | LL | SS | LL | SS |
| 6 | rs13478602      | SS | LL | SS | LL | LL | LL | SS | SS | LL |
| 6 | rs13478612      | SS | LL | SS | LL | LL | LL | SS | SS | LL |
| 6 | CEL-6_10519419  | SS | LL | SS | LL | LL | LL | SS | SS | SS |
| 6 | rs3678711       | SS | LL | SS | LL | LL | LL | SS | SS | SS |
| 6 | rs13478641      | SS | LL | SS | LL | LL | LL | SS | SS | SS |
| 6 | gnf06.016.989   | SS | LL | LL | LL | LL | LL | SS | SS | SS |
| 6 | rs3684494       | SS | LL | LL | LL | LL | LL | SS | SS | SS |
| 6 | rs13478676      | SS | LL | LL | LL | LL | LL | SS | SS | SS |
| 6 | rs13478681      | SS | LL | LL | LL | LL | LL | SS | LL | LL |
| 6 | rs6297560       | SS | LL | LL | LL | LL | LL | SS | LL | LL |
| 6 | gnf06.032.524   | SS | LL | LL | SS | LL | LL | SS | LL | LL |
| 6 | rs13478717      | SS | LL | LL | SS | LL | LL | SS | LL | LL |
| 6 | rs13478730      | SS | LL | LL | SS | LL | LL | SS | LL | SS |
| 6 | rs3684860       | SS | LL | LL | SS | LL | LL | SS | LL | LL |
| 6 | rs3023069       | SS | LL | SS | SS | SS | LL | SS | LL | SS |
| 6 | rs13478762      | SS | LL | SS | SS | SS | LL | SS | LL | SS |
| 6 | gnf06.058.959   | SS | LL | SS | SS | SS | LL | SS | LL | LL |
| 6 | rs13478818      | SS | LL | SS | SS | SS | LL | SS | LL | LL |
| 6 | rs6411497       | SS | LL | SS | SS | SS | LL | SS | LL | LL |
| 6 | rs13459097      | SS | LL | SS | SS | SS | SS | SS | LL | LL |
| 6 | rs3677567       | SS | LL | SS | SS | SS | SS | SS | LL | SS |
| 6 | rs6156752       | SS | LL | SS | LL | SS | SS | SS | LL | SS |
| 6 | rs6223362       | SS | LL | SS | LL | SS | SS | SS | LL | SS |
| 6 | gnf06.092.758   | SS | LL | SS | LL | SS | SS | SS | LL | SS |
| 6 | rs13478949      | SS | LL | SS | LL | LL | SS | SS | LL | LL |
| 6 | rs6204829       | SS | LL | SS | SS | LL | SS | SS | LL | LL |
| 6 | rs13478999      | SS | LL | SS | SS | LL | SS | SS | LL | LL |
| 6 | rs3722157       | SS | LL | SS | SS | LL | SS | SS | LL | LL |
| 6 | CEL-6_127435117 | SS | LL | SS | LL | LL | SS | SS | LL | LL |
| 6 | rs13479024      | SS | LL | SS | LL | LL | SS | SS | LL | LL |
| 6 | rs6387265       | SS | LL | LL | LL | LL | SS | SS | LL | LL |
| 7 | gnf07.010.101   | SS | LL | LL | SS | SS | LL | LL | LL | LL |
| 7 | UT_7_14.584506  | SS | LL | LL | SS | SS | LL | LL | LL | SS |
| 7 | rs13479154      | SS | LL | LL | SS | SS | LL | SS | LL | SS |
| 7 | rs13479171      | SS | LL | LL | SS | SS | LL | SS | LL | SS |
| 7 | rs3694031       | SS | LL | LL | LL | SS | LL | SS | LL | SS |
| 7 | rs6217275       | SS | LL | LL | LL | LL | LL | SS | LL | SS |
| 7 | gnf07.032.360   | SS | LL | LL | LL | LL | LL | SS | LL | SS |
| 7 | rs3717293       | SS | LL | LL | LL | LL | LL | SS | LL | SS |

|   |                 |    |    |    |    |    |    |    |    |    |
|---|-----------------|----|----|----|----|----|----|----|----|----|
| 7 | rs3679779       | SS | LL | LL | LL | LL | LL | SS | LL | SS |
| 7 | rs3667441       | SS | LL | SS | LL | LL | LL | SS | LL | SS |
| 7 | rs3723790       | SS | LL | SS | LL | LL | LL | SS | LL | SS |
| 7 | rs3676254       | SS | LL | SS | LL | LL | LL | SS | LL | SS |
| 7 | rs13479342      | SS | LL | SS | LL | LL | LL | LL | LL | SS |
| 7 | rs13479347      | SS | LL | SS | LL | LL | LL | LL | LL | SS |
| 7 | rs8248433       | SS | LL | SS | LL | LL | LL | LL | LL | LL |
| 7 | rs6213614       | SS | LL | SS | LL | LL | LL | LL | LL | LL |
| 7 | UT_7_90.803899  | SS | LL | SS | LL | LL | LL | LL | LL | LL |
| 7 | rs13479470      | SS | LL | SS | LL | LL | LL | LL | LL | LL |
| 7 | rs3656074       | SS | LL | SS | LL | LL | LL | LL | LL | LL |
| 7 | gnf07.120.460   | SS | LL | SS | LL | LL | LL | LL | SS | LL |
| 7 | CEL-7_116160192 | SS | LL | SS | LL | LL | LL | LL | SS | SS |
| 7 | rs8236684       | SS | LL | SS | LL | LL | SS | SS | SS | SS |
| 7 | CEL-7_126301023 | SS | LL | LL | LL | SS | LL | SS | SS | SS |
| 7 | rs6299045       | SS | LL | LL | LL | SS | LL | SS | SS | SS |
| 7 | rs3702894       | SS | LL | LL | LL | SS | LL | SS | LL | SS |
| 7 | rs6216320       | SS | LL | LL | LL | SS | LL | SS | LL | SS |
| 8 | rs6273176       | SS | LL | LL | LL | SS | LL | LL | LL | SS |
| 8 | rs13479601      | SS | LL | LL | LL | SS | LL | LL | LL | SS |
| 8 | rs6288205       | SS | LL | LL | LL | SS | LL | LL | LL | LL |
| 8 | rs13479628      | SS | LL | LL | LL | SS | LL | LL | SS | LL |
| 8 | CEL-8_25677705  | SS | LL | LL | SS | SS | LL | LL | SS | LL |
| 8 | rs13479769      | SS | LL | LL | SS | SS | SS | SS | SS | LL |
| 8 | rs13479784      | SS | LL | LL | LL | SS | SS | SS | SS | LL |
| 8 | rs3672639       | SS | LL | LL | LL | LL | SS | SS | SS | LL |
| 8 | rs6394046       | SS | LL | LL | LL | LL | SS | SS | SS | LL |
| 8 | rs13479873      | SS | LL | LL | LL | SS | SS | LL | SS | LL |
| 8 | rs13479879      | SS | LL | SS | LL | SS | SS | SS | SS | LL |
| 8 | rs3705695       | SS | LL | LL | SS | SS | SS | SS | SS | LL |
| 8 | rs6374927       | SS | LL | LL | SS | SS | SS | SS | SS | LL |
| 8 | rs3675125       | SS | LL | SS | SS | SS | SS | SS | SS | LL |
| 8 | rs8249856       | SS | LL | SS | SS | SS | SS | SS | SS | LL |
| 9 | rs13480065      | SS | LL | SS | SS | LL | LL | LL | SS | LL |
| 9 | rs13480112      | SS | LL | LL | SS | LL | LL | LL | SS | LL |
| 9 | rs6182405       | SS | LL | LL | SS | LL | LL | LL | SS | LL |
| 9 | petM-05537-1    | SS | LL | LL | SS | LL | LL | LL | LL | LL |
| 9 | CEL-9_29909656  | SS | LL | LL | SS | LL | LL | LL | LL | LL |
| 9 | rs13480130      | SS | LL | LL | LL | SS | LL | LL | LL | LL |
| 9 | rs3676086       | SS | LL | SS | LL | SS | LL | LL | LL | SS |
| 9 | rs13480166      | SS | LL | SS | LL | SS | LL | LL | SS | SS |
| 9 | gnf09.044.276   | SS | LL | SS | LL | SS | LL | SS | SS | SS |

|    |                    |    |    |    |    |    |    |    |    |    |
|----|--------------------|----|----|----|----|----|----|----|----|----|
| 9  | rs13480191         | SS | LL | SS | LL | LL | LL | SS | SS | SS |
| 9  | rs8259443          | SS | LL | SS | LL | LL | LL | SS | LL | SS |
| 9  | rs13480218         | SS | LL | SS | LL | LL | LL | SS | LL | SS |
| 9  | rs13480227         | SS | LL | SS | LL | LL | LL | LL | LL | SS |
| 9  | rs13480247         | SS | LL | SS | LL | LL | LL | LL | LL | SS |
| 9  | rs13480258         | SS | LL | SS | LL | LL | LL | LL | LL | LL |
| 9  | rs3703045          | SS | LL | LL | LL | LL | LL | LL | LL | LL |
| 9  | rs3724833          | SS | LL | LL | LL | LL | LL | LL | LL | LL |
| 9  | rs3670195          | SS | LL | LL | LL | SS | LL | LL | LL | LL |
| 9  | rs13480318         | SS | LL | LL | LL | SS | LL | LL | LL | LL |
| 9  | gnf09.087.298      | SS | LL | LL | LL | SS | LL | LL | LL | LL |
| 9  | rs13480387         | SS | LL | LL | LL | SS | LL | LL | LL | LL |
| 9  | rs3711089          | SS | LL | LL | LL | SS | LL | LL | LL | LL |
| 9  | rs6320810          | SS | LL | LL | LL | SS | LL | LL | LL | SS |
| 9  | rs3669563          | SS | LL | LL | LL | SS | SS | LL | LL | LL |
| 9  | rs13480454         | SS | LL | LL | LL | SS | SS | LL | SS | LL |
| 9  | rs6299531          | SS | LL | LL | LL | SS | SS | LL | SS | LL |
| 9  | rs8241505          | SS | LL | LL | LL | SS | SS | LL | LL | LL |
| 10 | rs13480510         | SS | LL | SS | LL | SS | LL | LL | LL | SS |
| 10 | rs13480516         | SS | LL | SS | LL | SS | LL | LL | LL | SS |
| 10 | rs13480527         | SS | LL | SS | LL | LL | LL | LL | LL | SS |
| 10 | rs3679120          | SS | LL | SS | LL | LL | LL | LL | LL | SS |
| 10 | rs13480547         | SS | LL | SS | LL | LL | LL | LL | LL | SS |
| 10 | rs13480601         | SS | LL | LL | SS | LL | LL | LL | LL | SS |
| 10 | rs3715820          | SS | LL | LL | LL | LL | LL | LL | LL | SS |
| 10 | rs6186864          | SS | LL | LL | LL | LL | LL | SS | LL | SS |
| 10 | rs13480630         | SS | LL | LL | LL | LL | LL | SS | LL | SS |
| 10 | rs13480638         | SS | LL | LL | LL | LL | LL | SS | LL | SS |
| 10 | rs13480652         | SS | LL | LL | LL | LL | LL | SS | LL | SS |
| 10 | rs13480678         | SS | LL | LL | LL | LL | LL | SS | LL | SS |
| 10 | mCV25373751        | SS | LL | LL | LL | LL | LL | SS | LL | SS |
| 10 | rs3661495          | SS | LL | SS | LL | LL | LL | SS | LL | SS |
| 10 | rs3704401          | SS | LL | SS | LL | LL | LL | SS | LL | SS |
| 10 | rs13480739         | SS | LL | LL | LL | LL | LL | SS | LL | SS |
| 10 | rs13480752         | SS | LL | LL | LL | LL | LL | SS | LL | SS |
| 10 | rs4228452          | SS | LL | LL | LL | LL | LL | SS | LL | SS |
| 10 | rs13480773         | SS | LL | SS | LL | LL | LL | SS | LL | SS |
| 10 | CZECH-10_116791624 | SS | LL | SS | LL | LL | SS | SS | LL | SS |
| 10 | rs6335076          | SS | LL | SS | LL | LL | LL | SS | LL | SS |
| 10 | rs6317716          | SS | LL | SS | LL | LL | LL | SS | LL | SS |
| 10 | rs13480808         | SS | LL | LL | LL | LL | LL | SS | LL | SS |
| 11 | rs13480835         | SS | LL | LL | LL | LL | LL | SS | LL | SS |

|    |                  |    |    |    |    |    |    |    |    |    |
|----|------------------|----|----|----|----|----|----|----|----|----|
| 11 | rs6393401        | SS | LL | LL | LL | LL | LL | SS | LL | SS |
| 11 | rs13480853       | SS | LL | LL | LL | LL | LL | LL | LL | SS |
| 11 | rs3689494        | SS | LL | LL | LL | LL | LL | LL | LL | SS |
| 11 | rs3658216        | SS | LL | LL | LL | LL | LL | LL | LL | SS |
| 11 | rs13480913       | SS | LL | LL | LL | LL | LL | LL | LL | SS |
| 11 | rs13480918       | SS | LL | LL | LL | SS | SS | LL | LL | SS |
| 11 | UT_11_29.443258  | SS | LL | LL | LL | SS | SS | LL | LL | SS |
| 11 | rs3690160        | SS | LL | LL | LL | SS | SS | LL | LL | SS |
| 11 | rs3660692        | SS | LL | LL | LL | SS | SS | LL | LL | SS |
| 11 | rs6326787        | SS | LL | SS | LL | SS | SS | LL | LL | SS |
| 11 | rs6199956        | SS | LL | SS | LL | SS | LL | LL | LL | SS |
| 11 | rs13481031       | SS | LL | SS | LL | SS | LL | LL | LL | SS |
| 11 | rs3684076        | SS | LL | SS | LL | SS | LL | LL | LL | SS |
| 11 | rs13481050       | SS | LL | SS | NA | SS | LL | LL | LL | SS |
| 11 | rs3714311        | SS | LL | LL | NA | SS | LL | SS | LL | SS |
| 11 | rs13481075       | SS | LL | LL | NA | LL | LL | SS | LL | SS |
| 11 | rs13481093       | SS | LL | LL | NA | LL | LL | SS | LL | SS |
| 11 | CEL-11_73459270  | SS | LL | LL | NA | LL | LL | SS | LL | SS |
| 11 | rs6178421        | SS | LL | LL | NA | LL | LL | SS | LL | SS |
| 11 | rs13481123       | SS | LL | LL | NA | LL | LL | SS | LL | SS |
| 11 | rs3661657        | SS | LL | LL | NA | LL | LL | SS | LL | SS |
| 11 | rs3688955        | SS | LL | LL | NA | LL | LL | SS | SS | LL |
| 11 | rs13481161       | SS | LL | LL | SS | SS | LL | SS | LL | LL |
| 11 | rs3686162        | SS | LL | LL | SS | SS | LL | SS | LL | LL |
| 11 | rs13474433       | SS | LL | LL | SS | SS | LL | SS | LL | LL |
| 11 | rs3695865        | SS | LL | LL | SS | SS | LL | SS | LL | LL |
| 11 | rs6180460        | SS | LL | LL | LL | SS | LL | SS | LL | LL |
| 11 | rs6407687        | SS | LL | LL | LL | SS | LL | SS | SS | LL |
| 11 | rs13481210       | SS | LL | LL | SS | SS | LL | SS | SS | LL |
| 11 | rs13481220       | SS | LL | LL | SS | SS | LL | SS | SS | LL |
| 11 | rs13481228       | SS | LL | LL | SS | SS | LL | SS | SS | SS |
| 11 | rs13481233       | SS | LL | LL | SS | SS | LL | SS | SS | SS |
| 11 | gnf11.121.400    | SS | LL | LL | SS | SS | LL | SS | SS | SS |
| 11 | rs3662930        | SS | LL | LL | SS | SS | LL | LL | SS | SS |
| 11 | gnf11.125.992    | SS | LL | LL | LL | SS | LL | LL | LL | SS |
| 11 | CEL-11_118234030 | SS | LL | LL | SS | SS | LL | LL | LL | SS |
| 12 | rs3699421        | SS | LL | LL | LL | LL | LL | LL | SS | LL |
| 12 | rs13481308       | SS | LL | LL | LL | LL | LL | SS | SS | LL |
| 12 | rs6328018        | SS | LL | LL | LL | LL | LL | LL | SS | LL |
| 12 | UT_12_24.561109  | SS | LL | LL | LL | LL | LL | LL | SS | SS |
| 12 | rs3695382        | SS | LL | LL | LL | LL | LL | LL | LL | SS |
| 12 | rs13481408       | SS | LL | LL | SS | LL | LL | LL | LL | SS |



|    |               |    |    |    |    |    |    |    |    |    |
|----|---------------|----|----|----|----|----|----|----|----|----|
| 12 | rs6317361     | SS | LL | LL | SS | LL | LL | LL | LL | LL |
| 12 | gnf12.053.286 | SS | LL | LL | SS | LL | LL | LL | LL | LL |
| 12 | rs3660822     | SS | LL | LL | SS | LL | LL | SS | LL | LL |
| 12 | rs6335879     | SS | LL | SS | SS | LL | LL | SS | LL | LL |
| 12 | rs3687032     | SS | LL | SS | SS | LL | LL | SS | LL | LL |
| 12 | rs3709008     | SS | LL | SS | SS | LL | LL | SS | LL | LL |
| 12 | rs3682382     | SS | LL | SS | SS | LL | LL | SS | LL | LL |
| 12 | rs3654718     | SS | LL | SS | SS | LL | LL | SS | LL | LL |
| 12 | rs13481561    | SS | LL | SS | SS | LL | LL | SS | LL | LL |
| 12 | rs6263380     | SS | LL | SS | SS | LL | LL | SS | LL | LL |
| 12 | rs13481571    | SS | LL | SS | LL | LL | LL | SS | LL | LL |
| 12 | rs3711162     | SS | LL | SS | LL | LL | LL | SS | LL | LL |
| 12 | rs6288403     | SS | LL | SS | LL | LL | LL | SS | LL | LL |
| 12 | rs13481592    | SS | LL | LL | SS | LL | LL | SS | LL | SS |
| 12 | rs3679514     | SS | LL | LL | SS | LL | LL | SS | LL | SS |
| 12 | rs13481618    | SS | LL | LL | SS | SS | LL | SS | LL | SS |
| 12 | rs13481632    | SS | LL | LL | SS | SS | LL | SS | LL | SS |
| 12 | rs13481641    | SS | LL | LL | SS | SS | LL | SS | SS | SS |
| 12 | rs13481651    | SS | LL | LL | SS | LL | LL | SS | SS | SS |
| 12 | rs4229612     | SS | LL | LL | LL | LL | LL | SS | SS | SS |
| 13 | rs6215262     | SS | LL | LL | NA | LL | SS | SS | SS | SS |
| 13 | rs13481702    | SS | LL | SS | NA | LL | SS | SS | SS | SS |
| 13 | rs13481706    | SS | LL | SS | NA | LL | SS | SS | SS | SS |
| 13 | rs3678616     | SS | LL | LL | NA | LL | SS | SS | SS | SS |
| 13 | gnf13.016.175 | SS | LL | SS | NA | LL | SS | SS | SS | SS |
| 13 | rs4229685     | SS | LL | SS | NA | LL | LL | SS | SS | LL |
| 13 | rs3724709     | SS | LL | SS | LL | SS | LL | SS | SS | LL |
| 13 | gnf13.038.133 | SS | LL | SS | LL | SS | LL | SS | SS | LL |
| 13 | rs6271232     | SS | LL | SS | LL | LL | LL | SS | SS | SS |
| 13 | rs3688207     | SS | LL | LL | LL | LL | LL | SS | SS | SS |
| 13 | rs13481823    | SS | LL | LL | LL | LL | LL | SS | SS | LL |
| 13 | gnf13.057.762 | SS | LL | LL | LL | LL | LL | SS | SS | LL |
| 13 | rs6410679     | SS | LL | LL | LL | LL | LL | SS | SS | LL |
| 13 | rs6381045     | SS | LL | LL | LL | LL | LL | SS | SS | SS |
| 13 | rs3721965     | SS | LL | LL | LL | LL | LL | SS | SS | LL |
| 13 | rs13481886    | SS | LL | LL | SS | LL | LL | SS | SS | LL |
| 13 | rs13481892    | SS | LL | LL | SS | LL | LL | SS | SS | LL |
| 13 | mCV24625340   | SS | LL | LL | SS | LL | LL | SS | SS | LL |
| 13 | gnf13.092.499 | SS | LL | LL | SS | LL | SS | SS | SS | LL |
| 13 | rs13481958    | SS | LL | LL | SS | LL | SS | SS | SS | SS |
| 13 | rs3688959     | SS | LL | LL | NA | LL | SS | SS | LL | SS |
| 13 | rs6389588     | SS | LL | LL | NA | LL | LL | SS | LL | SS |

|    |                  |    |    |    |    |    |    |    |    |    |
|----|------------------|----|----|----|----|----|----|----|----|----|
| 13 | rs13482000       | SS | LL | SS | LL | LL | LL | SS | SS | SS |
| 13 | mCV24886326      | SS | LL | LL | LL | SS | LL | SS | SS | SS |
| 13 | rs6247696        | SS | LL | LL | LL | LL | LL | SS | LL | SS |
| 13 | rs6397687        | SS | LL | LL | LL | LL | LL | SS | LL | SS |
| 14 | rs3687889        | SS | LL | LL | LL | SS | LL | LL | SS | LL |
| 14 | rs6397486        | SS | LL | LL | LL | LL | LL | LL | SS | LL |
| 14 | mCV23128760      | SS | LL | LL | LL | LL | LL | LL | SS | LL |
| 14 | rs3701623        | SS | LL | SS | LL | LL | LL | SS | LL | LL |
| 14 | rs13482262       | SS | LL | SS | LL | LL | LL | SS | LL | LL |
| 14 | rs6352085        | SS | LL | SS | LL | LL | LL | SS | LL | SS |
| 14 | rs13482276       | SS | LL | SS | LL | LL | LL | SS | LL | SS |
| 14 | rs13482281       | SS | LL | SS | LL | LL | LL | SS | SS | SS |
| 14 | rs13482296       | SS | LL | SS | LL | LL | LL | SS | SS | SS |
| 14 | rs6211694        | SS | LL | SS | LL | SS | LL | SS | SS | LL |
| 14 | CEL-14_110783830 | SS | LL | SS | LL | SS | LL | SS | SS | SS |
| 14 | rs3707842        | SS | LL | SS | LL | SS | LL | SS | SS | LL |
| 14 | gnf14.117.278    | SS | LL | SS | LL | SS | LL | LL | SS | LL |
| 14 | rs13482416       | SS | LL | SS | LL | LL | LL | LL | SS | LL |
| 15 | rs13459176       | SS | LL | LL | SS | LL | LL | LL | SS | LL |
| 15 | rs13482431       | SS | LL | LL | LL | LL | LL | LL | SS | LL |
| 15 | rs13482446       | SS | LL | LL | LL | LL | SS | LL | SS | LL |
| 15 | CEL-15_15919629  | SS | LL | LL | LL | LL | SS | LL | SS | LL |
| 15 | rs13482461       | SS | LL | LL | LL | LL | SS | LL | SS | LL |
| 15 | rs13482486       | SS | LL | SS | LL | LL | SS | LL | SS | LL |
| 15 | rs3670581        | SS | LL | SS | LL | LL | SS | LL | SS | LL |
| 15 | rs13482498       | SS | LL | SS | LL | SS | SS | LL | SS | LL |
| 15 | rs3088525        | SS | LL | SS | LL | SS | SS | SS | SS | LL |
| 15 | rs6188239        | SS | LL | SS | LL | SS | SS | SS | SS | LL |
| 15 | rs3695416        | SS | LL | SS | LL | SS | SS | SS | SS | LL |
| 15 | rs3677296        | SS | LL | SS | LL | SS | SS | LL | SS | LL |
| 15 | rs13482536       | SS | LL | SS | LL | SS | SS | LL | SS | LL |
| 15 | rs13482541       | SS | LL | SS | LL | SS | SS | LL | SS | LL |
| 15 | rs3660290        | SS | LL | LL | LL | SS | SS | LL | SS | SS |
| 15 | rs13482589       | SS | LL | LL | LL | SS | SS | LL | SS | SS |
| 15 | rs13482595       | SS | LL | SS | LL | SS | SS | LL | SS | SS |
| 15 | rs13482612       | SS | LL | SS | LL | SS | SS | LL | LL | SS |
| 15 | rs13482618       | SS | LL | LL | LL | SS | SS | LL | LL | SS |
| 15 | rs6197332        | SS | LL | SS | LL | SS | SS | LL | LL | SS |
| 15 | rs13482642       | SS | LL | SS | LL | SS | SS | LL | LL | SS |
| 15 | rs6287697        | SS | LL | SS | LL | SS | SS | LL | LL | SS |
| 15 | rs13482711       | SS | LL | SS | LL | SS | SS | LL | LL | SS |
| 15 | rs13482719       | SS | LL | SS | LL | SS | LL | LL | LL | SS |

|    |               |    |    |    |    |    |    |    |    |    |
|----|---------------|----|----|----|----|----|----|----|----|----|
| 15 | rs13482726    | SS | LL | SS | LL | SS | LL | LL | LL | LL |
| 15 | rs13482732    | SS | LL | SS | LL | SS | SS | LL | LL | LL |
| 15 | rs3708604     | SS | LL | SS | LL | SS | SS | LL | LL | LL |
| 15 | rs13482741    | SS | LL | SS | LL | SS | SS | LL | LL | LL |
| 16 | rs4152386     | SS | LL | SS | SS | LL | LL | LL | SS | SS |
| 16 | rs4165119     | SS | LL | LL | SS | LL | LL | LL | LL | SS |
| 16 | rs6294027     | SS | LL | SS | SS | LL | LL | LL | LL | SS |
| 16 | rs4172338     | SS | LL | SS | SS | LL | LL | LL | LL | SS |
| 16 | rs4173709     | SS | LL | SS | SS | LL | SS | LL | LL | SS |
| 16 | rs4175608     | SS | LL | LL | SS | LL | SS | LL | LL | SS |
| 16 | rs4177203     | SS | LL | LL | SS | SS | SS | LL | LL | SS |
| 16 | rs4179117     | SS | LL | LL | SS | SS | SS | LL | SS | SS |
| 16 | rs4184315     | SS | LL | LL | LL | SS | SS | LL | SS | SS |
| 16 | rs4185176     | SS | LL | LL | LL | SS | SS | SS | SS | SS |
| 16 | rs6271301     | SS | LL | LL | SS | SS | SS | SS | SS | SS |
| 16 | rs4192132     | SS | LL | LL | SS | SS | SS | SS | SS | SS |
| 16 | rs4197416     | SS | LL | LL | SS | SS | SS | LL | SS | SS |
| 16 | rs4197725     | SS | LL | LL | SS | SS | SS | SS | SS | SS |
| 16 | rs4202372     | SS | LL | LL | SS | SS | SS | LL | SS | SS |
| 16 | rs4203891     | SS | LL | LL | SS | SS | SS | LL | SS | SS |
| 16 | rs4205524     | SS | LL | LL | SS | SS | SS | SS | SS | SS |
| 16 | rs4211515     | SS | LL | NA | SS | LL | SS | SS | SS | SS |
| 16 | rs4211731     | SS | LL | NA | SS | LL | SS | SS | SS | SS |
| 16 | rs4219239     | SS | LL | SS | SS | LL | LL | LL | SS | SS |
| 16 | rs4219897     | SS | LL | SS | SS | LL | LL | LL | SS | SS |
| 17 | rs3724616     | SS | LL | SS | LL | SS | LL | LL | SS | SS |
| 17 | rs3702484     | SS | LL | SS | LL | SS | LL | LL | SS | LL |
| 17 | rs4231344     | SS | LL | LL | SS | SS | LL | SS | SS | LL |
| 17 | rs3090500     | SS | LL | LL | SS | SS | LL | SS | SS | LL |
| 17 | rs4136360     | SS | LL | LL | SS | SS | LL | SS | SS | LL |
| 17 | rs6358703     | SS | LL | LL | SS | SS | LL | SS | SS | LL |
| 17 | rs13482947    | SS | LL | LL | LL | SS | LL | SS | SS | SS |
| 17 | gnf17.035.152 | SS | LL | LL | LL | SS | LL | LL | SS | SS |
| 17 | rs13482968    | SS | LL | LL | LL | SS | LL | LL | SS | SS |
| 17 | rs13482973    | SS | LL | SS | LL | SS | LL | LL | SS | SS |
| 17 | rs3090988     | SS | LL | SS | LL | SS | LL | LL | SS | SS |
| 17 | mCV22888090   | SS | LL | LL | LL | LL | LL | SS | SS | SS |
| 17 | rs13483075    | SS | LL | LL | LL | LL | LL | SS | SS | SS |
| 17 | rs6322076     | SS | LL | LL | LL | LL | SS | SS | SS | SS |
| 17 | rs6386440     | SS | LL | LL | LL | LL | SS | SS | SS | SS |
| 17 | rs3684732     | SS | LL | LL | SS | LL | SS | SS | SS | SS |
| 17 | rs3701338     | SS | LL | LL | SS | LL | SS | SS | SS | SS |

|    |                 |    |    |    |    |    |    |    |    |    |
|----|-----------------|----|----|----|----|----|----|----|----|----|
| 17 | rs13483144      | SS | LL | LL | SS | LL | SS | LL | SS | SS |
| 18 | rs13483183      | SS | LL | LL | LL | SS | SS | SS | LL | LL |
| 18 | rs13483200      | SS | LL | LL | LL | SS | SS | SS | LL | LL |
| 18 | rs13483210      | SS | LL | LL | LL | SS | SS | SS | LL | SS |
| 18 | mCV23617245     | SS | LL | LL | LL | SS | SS | SS | LL | SS |
| 18 | rs6194744       | SS | LL | LL | LL | SS | LL | SS | LL | SS |
| 18 | rs13483262      | SS | LL | LL | LL | SS | LL | SS | LL | SS |
| 18 | rs13483277      | SS | LL | SS | LL | SS | LL | SS | LL | SS |
| 18 | CEL-18_32158369 | SS | LL | SS | LL | SS | LL | SS | SS | SS |
| 18 | rs3675531       | SS | LL | SS | LL | SS | SS | SS | SS | LL |
| 18 | gnf18.033.953   | SS | LL | SS | SS | SS | SS | SS | SS | SS |
| 18 | rs13483319      | SS | LL | SS | SS | SS | SS | SS | SS | SS |
| 18 | rs6313313       | SS | LL | SS | SS | SS | SS | SS | SS | SS |
| 18 | rs3676196       | SS | LL | SS | SS | SS | SS | SS | SS | SS |
| 18 | rs13483340      | SS | LL | SS | SS | LL | SS | SS | SS | SS |
| 18 | rs6184541       | SS | LL | SS | SS | LL | LL | SS | SS | SS |
| 18 | rs3654438       | SS | LL | LL | SS | SS | LL | SS | SS | SS |
| 18 | rs3688789       | SS | LL | LL | SS | SS | LL | SS | SS | SS |
| 18 | rs3716803       | SS | LL | LL | SS | SS | LL | SS | SS | SS |
| 18 | rs13483423      | SS | LL | LL | SS | SS | LL | SS | SS | SS |
| 18 | gnf18.069.928   | SS | LL | LL | SS | SS | LL | SS | SS | SS |
| 18 | rs6302629       | SS | LL | LL | LL | SS | LL | SS | SS | SS |
| 18 | rs3705890       | SS | LL | SS | LL | SS | LL | SS | SS | SS |
| 18 | rs3671707       | SS | LL | SS | LL | SS | LL | SS | SS | SS |
| 18 | rs13483466      | SS | LL | SS | LL | SS | LL | SS | SS | SS |
| 19 | rs3713033       | SS | LL | SS | SS | LL | SS | SS | LL | LL |
| 19 | rs13483526      | SS | LL | SS | LL | LL | SS | SS | LL | LL |
| 19 | rs6316813       | SS | LL | SS | LL | LL | SS | SS | LL | LL |
| 19 | rs6307076       | SS | LL | SS | LL | LL | SS | LL | LL | LL |
| 19 | rs6342493       | SS | LL | LL | SS | LL | SS | SS | LL | SS |
| 19 | rs6291559       | SS | LL | LL | SS | LL | SS | SS | LL | SS |
| 19 | rs3714482       | SS | LL | LL | SS | LL | LL | SS | LL | SS |
| 19 | CEL-19_32349880 | SS | LL | LL | SS | LL | SS | SS | LL | SS |
| 19 | rs13483650      | SS | LL | LL | LL | SS | SS | SS | LL | SS |
| 19 | CEL-19_48242857 | SS | LL | LL | LL | SS | SS | SS | LL | SS |
| 19 | rs13483677      | SS | LL | SS | LL | SS | SS | SS | LL | SS |
| 19 | rs3711945       | SS | LL | SS | SS | SS | SS | SS | LL | SS |
| X  | rs13483712      | SS | LL | SS | SS | LL | LL | LL | LL | SS |
| X  | rs13483724      | SS | LL | LL | LL | LL | LL | LL | LL | SS |
| X  | rs13483777      | SS | LL | LL | LL | LL | LL | LL | LL | LL |
| X  | rs13483884      | SS | LL | LL | LL | LL | LL | SS | LL | LL |
| X  | rs13483899      | SS | LL | SS | LL | LL | LL | SS | LL | LL |

|   |                 |    |    |    |    |    |    |    |    |    |
|---|-----------------|----|----|----|----|----|----|----|----|----|
| X | gnfX.084.751    | SS | LL | LL | LL | LL | LL | SS | LL | LL |
| X | gnfX.086.039    | SS | LL | LL | LL | LL | LL | SS | SS | LL |
| X | rs13483951      | SS | LL | LL | LL | LL | LL | SS | SS | LL |
| X | rs6205221       | SS | LL | LL | LL | LL | LL | SS | SS | LL |
| X | rs13484003      | SS | LL | LL | LL | LL | LL | SS | SS | LL |
| X | gnfX.118.600    | SS | LL | LL | LL | LL | LL | SS | LL | LL |
| X | rs13484038      | SS | LL | LL | LL | LL | LL | SS | LL | LL |
| X | gnfX.124.190    | SS | LL | LL | LL | LL | LL | SS | LL | LL |
| X | CEL-X_133525088 | SS | LL | LL | LL | LL | LL | SS | LL | LL |
| X | rs13484050      | SS | LL | LL | LL | LL | LL | LL | LL | LL |
| X | rs13484093      | SS | LL | LL | LL | LL | LL | LL | LL | LL |
| X | rs13484094      | SS | LL | LL | LL | LL | LL | LL | LL | LL |

---

| CHR | SNP                | 22 | 23 | 31 | 33 | 35 | 38 | 39 | 45 | 46 | 48 |
|-----|--------------------|----|----|----|----|----|----|----|----|----|----|
| 1   | rs3683945          | LL | SS | LL | LL | SS | LL | LL | SS | LL | LL |
| 1   | rs13475748         | LL | SS | LL | LL | SS | LL | LL | SS | LL | LL |
| 1   | rs13475774         | LL | SS | LL | LL | LL | LL | LL | SS | LL | LL |
| 1   | rs13475816         | LL | SS | LL | LL | LL | SS | SS | SS | LL | LL |
| 1   | rs3685569          | LL | SS | LL | LL | LL | SS | SS | SS | LL | SS |
| 1   | gnf01.037.906      | LL | SS | LL | LL | LL | SS | SS | SS | LL | LL |
| 1   | rs3663706          | LL | SS | LL | LL | SS | SS | SS | SS | LL | LL |
| 1   | rs13475837         | LL | SS | LL | LL | LL | SS | SS | SS | LL | LL |
| 1   | rs13475863         | LL | SS | LL | SS | LL | SS | SS | SS | LL | SS |
| 1   | rs13475874         | LL | SS | LL | SS | LL | SS | SS | SS | SS | SS |
| 1   | petAF067836-350A-1 | LL | LL | LL | SS | LL | SS | SS | SS | SS | SS |
| 1   | rs13475894         | LL | LL | LL | SS | LL | SS | LL | SS | LL | LL |
| 1   | rs13475902         | LL | LL | LL | SS | LL | SS | LL | SS | LL | LL |
| 1   | rs13475903         | LL | LL | LL | LL | LL | SS | LL | SS | LL | LL |
| 1   | rs13475931         | LL | LL | LL | SS | LL | SS | LL | SS | LL | LL |
| 1   | rs3667200          | LL | LL | LL | LL | LL | SS | LL | SS | LL | LL |
| 1   | rs13475970         | LL | LL | LL | LL | LL | SS | LL | SS | LL | LL |
| 1   | rs3664800          | LL | LL | LL | NA | LL | SS | LL | SS | LL | LL |
| 1   | rs6342650          | LL | LL | LL | NA | LL | SS | LL | SS | LL | LL |
| 1   | rs13476036         | LL | LL | LL | NA | LL | SS | LL | SS | LL | SS |
| 1   | mCV22824651        | LL | LL | LL | NA | LL | SS | LL | SS | LL | SS |
| 1   | rs3719973          | LL | LL | LL | NA | LL | SS | LL | SS | LL | LL |
| 1   | rs3686671          | LL | LL | LL | NA | LL | SS | LL | SS | LL | LL |
| 1   | rs3691374          | LL | LL | LL | SS | LL | SS | LL | SS | SS | LL |
| 1   | rs13476122         | LL | LL | LL | SS | LL | SS | LL | SS | LL | LL |
| 1   | rs13476125         | LL | LL | LL | SS | SS | SS | LL | SS | LL | SS |
| 1   | rs6250257          | LL | SS | LL | SS | SS | SS | LL | SS | LL | SS |
| 1   | rs13476136         | LL | SS | LL | SS | LL | SS | LL | SS | LL | SS |
| 1   | rs6186115          | LL | SS | LL | SS | LL | SS | LL | SS | LL | LL |
| 1   | gnf01.157.188      | LL | SS | LL | SS | LL | SS | LL | SS | LL | LL |
| 1   | rs13476211         | LL | LL | LL | SS | LL | SS | LL | SS | LL | SS |
| 1   | rs8256589          | LL | LL | LL | SS | LL | SS | LL | SS | SS | SS |
| 1   | rs8242852          | LL | LL | LL | LL | SS | LL | LL | SS | SS | SS |
| 1   | rs13476248         | LL | LL | LL | LL | SS | LL | LL | SS | SS | LL |
| 1   | rs3723788          | LL | LL | LL | LL | LL | LL | LL | SS | SS | LL |
| 1   | mCV23509126        | LL | LL | LL | LL | SS | LL | LL | SS | SS | LL |
| 1   | rs6157620          | LL | SS | LL | LL | SS | LL | LL | SS | SS | LL |
| 1   | rs13476286         | LL | SS | LL | LL | SS | LL | LL | SS | SS | LL |
| 1   | rs13476293         | LL | SS | LL | LL | SS | LL | LL | SS | SS | SS |

|   |                |    |    |    |    |    |    |    |    |    |    |
|---|----------------|----|----|----|----|----|----|----|----|----|----|
| 1 | rs13476308     | LL | SS | LL | LL | SS | LL | SS | SS | SS | SS |
| 2 | rs13476319     | SS | LL | LL | SS | LL | SS | SS | LL | LL | LL |
| 2 | rs6359983      | SS | LL | LL | SS | LL | SS | LL | LL | LL | LL |
| 2 | gnf02.007.482  | SS | LL | LL | SS | LL | SS | LL | LL | LL | LL |
| 2 | rs3688854      | SS | LL | LL | LL | SS | LL | SS | LL | LL | LL |
| 2 | mCV23209429    | SS | LL | LL | LL | SS | LL | SS | SS | LL | SS |
| 2 | rs13476425     | SS | LL | LL | SS | SS | LL | SS | SS | LL | SS |
| 2 | rs6313371      | SS | LL | LL | SS | SS | LL | LL | SS | LL | SS |
| 2 | rs3680197      | SS | LL | LL | SS | SS | LL | LL | SS | LL | SS |
| 2 | rs3718711      | LL | LL | LL | LL | SS | LL | LL | SS | LL | SS |
| 2 | rs3022886      | LL | LL | LL | LL | SS | LL | LL | SS | LL | SS |
| 2 | rs8263587      | LL | LL | SS | SS | SS | LL | SS | SS | LL | SS |
| 2 | rs6295014      | LL | LL | LL | NA | SS | LL | LL | LL | LL | SS |
| 2 | rs3710094      | LL | LL | LL | NA | SS | LL | LL | LL | LL | SS |
| 2 | CEL-2_79237503 | LL | LL | LL | NA | LL | LL | LL | LL | LL | SS |
| 2 | rs13476598     | SS | LL | LL | NA | LL | LL | LL | LL | LL | SS |
| 2 | rs13476637     | SS | LL | LL | NA | LL | LL | LL | LL | LL | LL |
| 2 | rs13476647     | SS | LL | LL | NA | LL | LL | LL | LL | LL | SS |
| 2 | rs6406705      | SS | LL | LL | NA | LL | LL | LL | LL | LL | SS |
| 2 | rs6208879      | SS | LL | LL | NA | LL | LL | LL | LL | LL | SS |
| 2 | rs13476723     | LL | LL | LL | NA | LL | LL | LL | LL | LL | SS |
| 2 | rs3725853      | LL | LL | LL | NA | SS | LL | LL | LL | LL | SS |
| 2 | rs13476761     | LL | LL | LL | SS | SS | SS | LL | LL | LL | SS |
| 2 | rs13476787     | LL | LL | LL | SS | SS | SS | SS | LL | LL | SS |
| 2 | rs6249968      | LL | LL | LL | SS | SS | SS | LL | LL | LL | SS |
| 2 | mCV23169908    | LL | LL | LL | SS | SS | SS | LL | LL | LL | SS |
| 2 | rs3676033      | LL | LL | LL | SS | SS | SS | SS | LL | LL | SS |
| 2 | rs13476846     | LL | LL | LL | SS | LL | SS | SS | LL | LL | SS |
| 2 | rs6209403      | LL | LL | LL | SS | LL | SS | LL | LL | LL | SS |
| 2 | rs6315439      | LL | LL | LL | LL | LL | LL | SS | LL | LL | LL |
| 2 | rs13476860     | LL | LL | LL | SS | LL | SS | SS | LL | LL | SS |
| 2 | gnf02.161.674  | LL | LL | LL | SS | SS | SS | SS | LL | LL | SS |
| 2 | rs6204920      | LL | LL | LL | SS | SS | SS | SS | SS | LL | SS |
| 2 | rs3673613      | LL | LL | LL | SS | SS | SS | SS | SS | LL | LL |
| 2 | rs13476894     | LL | LL | LL | SS | LL | SS | SS | SS | LL | LL |
| 2 | rs6160839      | LL | LL | SS | SS | LL | SS | SS | SS | SS | LL |
| 2 | rs13476925     | SS | LL | SS | SS | LL | SS | SS | SS | SS | LL |
| 2 | rs8238755      | SS | LL | SS | LL | LL | LL | SS | SS | SS | LL |
| 2 | rs13476936     | SS | LL | SS | LL | LL | LL | SS | SS | SS | LL |
| 3 | rs13476950     | LL | SS | LL | SS | SS | SS | SS | SS | SS | LL |
| 3 | rs13477017     | LL | SS | LL | SS | SS | SS | SS | SS | SS | LL |
| 3 | rs3677132      | LL | SS | LL | SS | SS | SS | SS | SS | SS | LL |

|   |                 |    |    |    |    |    |    |    |    |    |    |
|---|-----------------|----|----|----|----|----|----|----|----|----|----|
| 3 | CEL-3_31146697  | LL | SS | LL | SS | SS | SS | SS | SS | SS | SS |
| 3 | rs6351323       | LL | SS | LL | LL | SS | SS | SS | SS | SS | SS |
| 3 | rs3720738       | LL | SS | LL | LL | SS | SS | SS | SS | LL | SS |
| 3 | rs13477066      | LL | SS | LL | LL | SS | SS | SS | LL | LL | SS |
| 3 | rs6335414       | LL | SS | LL | LL | SS | SS | SS | LL | LL | LL |
| 3 | rs13477178      | LL | SS | LL | LL | SS | SS | SS | LL | LL | LL |
| 3 | rs3659688       | LL | SS | LL | LL | SS | SS | LL | LL | LL | LL |
| 3 | gnf03.073.308   | LL | SS | LL | LL | SS | SS | LL | LL | LL | LL |
| 3 | rs3659866       | LL | SS | LL | LL | SS | SS | LL | LL | LL | LL |
| 3 | rs13477230      | LL | SS | LL | LL | SS | SS | LL | LL | SS | LL |
| 3 | rs6243021       | LL | SS | LL | SS | SS | SS | LL | LL | SS | LL |
| 3 | rs13477242      | SS | SS | LL | SS | SS | SS | LL | LL | SS | LL |
| 3 | rs13475064      | SS | LL | LL | SS | SS | SS | LL | LL | SS | LL |
| 3 | rs13477254      | SS | LL | LL | SS | SS | SS | LL | LL | SS | LL |
| 3 | rs13459185      | LL | LL | LL | SS | SS | SS | LL | LL | SS | SS |
| 3 | rs3671622       | LL | LL | SS | SS | SS | SS | LL | LL | SS | SS |
| 3 | rs8256683       | LL | LL | SS | SS | SS | SS | LL | LL | SS | SS |
| 3 | gnf03.117.090   | LL | LL | SS | SS | SS | SS | LL | LL | SS | SS |
| 3 | rs13477355      | LL | LL | SS | LL | SS | LL | LL | LL | SS | SS |
| 3 | rs13477379      | LL | LL | SS | LL | SS | LL | LL | LL | LL | LL |
| 3 | rs3707706       | LL | SS | LL | LL | SS | LL | LL | LL | LL | LL |
| 3 | rs13477391      | LL | SS | LL | LL | SS | LL | LL | LL | LL | LL |
| 3 | rs3658914       | LL | SS | LL | LL | SS | LL | LL | LL | LL | LL |
| 3 | rs13477410      | LL | SS | LL | SS | SS | SS | LL | LL | LL | LL |
| 3 | rs13477421      | LL | SS | LL | SS | SS | SS | LL | LL | LL | SS |
| 3 | CEL-3_137067761 | SS | SS | LL | SS | SS | SS | LL | LL | LL | SS |
| 3 | rs13477529      | SS | SS | LL | SS | SS | LL | LL | LL | LL | SS |
| 3 | rs13477477      | SS | SS | LL | SS | SS | LL | LL | LL | SS | SS |
| 3 | rs3695386       | SS | SS | LL | SS | SS | LL | LL | LL | SS | SS |
| 4 | rs13477541      | SS | SS | LL | SS | LL | SS | LL | LL | LL | LL |
| 4 | rs13477546      | SS | SS | LL | SS | LL | SS | LL | LL | LL | LL |
| 4 | rs6324271       | SS | SS | LL | SS | LL | SS | LL | SS | LL | LL |
| 4 | rs13477576      | SS | SS | LL | SS | SS | SS | LL | SS | LL | LL |
| 4 | rs13477595      | SS | SS | LL | SS | SS | SS | LL | SS | LL | SS |
| 4 | rs13477623      | SS | SS | LL | SS | SS | SS | LL | SS | LL | SS |
| 4 | rs3719299       | SS | SS | LL | SS | SS | SS | LL | SS | LL | SS |
| 4 | rs3684104       | SS | SS | LL | SS | SS | SS | LL | SS | LL | SS |
| 4 | rs13477678      | SS | SS | LL | SS | SS | SS | SS | SS | LL | SS |
| 4 | rs3707178       | SS | SS | LL | LL | SS | LL | SS | SS | LL | SS |
| 4 | rs6269326       | SS | SS | LL | LL | SS | LL | SS | SS | LL | LL |
| 4 | rs13477711      | SS | SS | LL | LL | SS | LL | SS | SS | LL | SS |
| 4 | rs13477725      | SS | SS | LL | LL | SS | LL | SS | SS | LL | SS |



|   |               |    |    |    |    |    |    |    |    |    |    |
|---|---------------|----|----|----|----|----|----|----|----|----|----|
| 4 | rs6370644     | SS | SS | LL | LL | SS | LL | SS | SS | LL | SS |
| 4 | rs13477769    | SS | SS | LL | SS | SS | SS | SS | SS | LL | SS |
| 4 | rs6255772     | SS | SS | LL | SS | SS | SS | SS | SS | LL | SS |
| 4 | mCV22668736   | LL | SS | LL | SS | SS | SS | SS | SS | LL | SS |
| 4 | rs3022993     | LL | SS | LL | LL | SS | SS | SS | SS | LL | LL |
| 4 | rs3678308     | LL | SS | LL | SS | SS | SS | SS | SS | SS | LL |
| 4 | rs13477968    | SS | SS | LL | LL | SS | SS | SS | SS | SS | LL |
| 4 | rs4224808     | SS | SS | LL | LL | SS | SS | SS | SS | SS | SS |
| 4 | rs3663950     | SS | LL | LL | LL | SS | SS | SS | SS | SS | SS |
| 4 | rs3023025     | SS | SS | LL | SS | SS | SS | LL | LL | SS | SS |
| 4 | rs4136314     | SS | LL | LL | SS | SS | SS | LL | LL | SS | SS |
| 4 | rs3696703     | SS | LL | LL | SS | SS | LL | LL | LL | LL | SS |
| 5 | rs13478093    | LL | LL | LL | SS | LL | SS | LL | SS | LL | LL |
| 5 | rs3709946     | LL | LL | LL | SS | LL | SS | LL | SS | SS | LL |
| 5 | rs3676096     | LL | LL | LL | SS | LL | SS | LL | SS | SS | LL |
| 5 | rs3714258     | LL | LL | LL | SS | LL | SS | LL | SS | LL | LL |
| 5 | rs13478133    | LL | LL | LL | SS | LL | SS | LL | SS | LL | SS |
| 5 | rs13478148    | LL | LL | LL | SS | LL | SS | LL | LL | LL | SS |
| 5 | rs13478204    | LL | LL | LL | SS | SS | SS | LL | LL | LL | SS |
| 5 | rs13478217    | SS | LL | LL | SS | SS | SS | LL | LL | SS | SS |
| 5 | rs6248036     | SS | SS | LL | SS | SS | SS | LL | LL | SS | SS |
| 5 | rs3711950     | LL | LL | LL | SS | SS | SS | LL | LL | SS | SS |
| 5 | rs6267669     | LL | LL | LL | SS | SS | SS | LL | LL | LL | SS |
| 5 | rs3684754     | LL | SS | LL | SS | SS | SS | LL | LL | LL | SS |
| 5 | rs6409508     | LL | SS | LL | SS | SS | SS | LL | LL | LL | SS |
| 5 | gnf05.069.163 | LL | LL | LL | SS | SS | SS | LL | LL | LL | SS |
| 5 | rs6221589     | LL | LL | LL | SS | SS | SS | LL | LL | LL | SS |
| 5 | rs3658150     | LL | LL | LL | SS | LL | SS | LL | LL | LL | SS |
| 5 | rs13478355    | LL | LL | LL | SS | LL | SS | LL | LL | LL | SS |
| 5 | rs13478392    | LL | LL | LL | SS | SS | SS | LL | LL | LL | SS |
| 5 | rs3661241     | LL | LL | LL | LL | SS | LL | LL | LL | LL | SS |
| 5 | rs13478473    | SS | LL | LL | LL | SS | LL | LL | LL | LL | SS |
| 5 | mCV22554962   | SS | LL | LL | SS | SS | SS | LL | LL | LL | SS |
| 5 | rs3662655     | SS | LL | LL | SS | SS | SS | LL | LL | LL | SS |
| 5 | rs13478509    | SS | LL | LL | SS | LL | SS | LL | LL | LL | SS |
| 5 | rs3701266     | SS | LL | LL | SS | LL | SS | LL | LL | LL | SS |
| 5 | rs13478522    | SS | LL | LL | SS | LL | SS | LL | LL | SS | SS |
| 5 | rs6377710     | SS | LL | LL | SS | LL | SS | LL | LL | SS | LL |
| 5 | rs13478540    | SS | LL | LL | LL | LL | LL | LL | LL | SS | LL |
| 5 | rs3711751     | SS | LL | LL | LL | LL | LL | LL | LL | LL | LL |
| 5 | rs3023061     | SS | LL | SS | LL | LL | LL | LL | LL | LL | LL |
| 5 | mCV25009162   | SS | LL | LL | LL | SS | LL | LL | LL | LL | LL |

|   |                 |    |    |    |    |    |    |    |    |    |    |
|---|-----------------|----|----|----|----|----|----|----|----|----|----|
| 5 | rs13478589      | SS | SS | LL | LL | SS | LL | SS | LL | LL | SS |
| 5 | rs3718776       | SS | SS | LL | LL | SS | LL | LL | LL | LL | SS |
| 6 | rs13478602      | SS | LL | LL | SS | LL | SS | SS | SS | LL | SS |
| 6 | rs13478612      | SS | LL | LL | SS | LL | SS | SS | SS | LL | NA |
| 6 | CEL-6_10519419  | SS | LL | LL | SS | LL | SS | SS | SS | LL | NA |
| 6 | rs3678711       | SS | LL | LL | SS | LL | SS | SS | LL | SS | NA |
| 6 | rs13478641      | SS | LL | LL | SS | LL | SS | SS | LL | SS | LL |
| 6 | gnf06.016.989   | SS | LL | LL | SS | LL | SS | SS | LL | SS | LL |
| 6 | rs3684494       | SS | LL | LL | SS | SS | SS | SS | LL | SS | LL |
| 6 | rs13478676      | SS | LL | LL | LL | SS | LL | SS | LL | SS | LL |
| 6 | rs13478681      | SS | LL | LL | LL | SS | LL | SS | LL | SS | LL |
| 6 | rs6297560       | SS | LL | LL | LL | LL | LL | SS | LL | SS | LL |
| 6 | gnf06.032.524   | SS | LL | LL | LL | SS | LL | SS | LL | SS | LL |
| 6 | rs13478717      | SS | LL | LL | LL | SS | LL | SS | LL | SS | SS |
| 6 | rs13478730      | SS | LL | LL | LL | SS | LL | SS | LL | SS | SS |
| 6 | rs3684860       | SS | LL | LL | LL | SS | LL | SS | LL | LL | SS |
| 6 | rs3023069       | SS | LL | LL | LL | SS | LL | SS | LL | LL | SS |
| 6 | rs13478762      | SS | LL | LL | LL | SS | LL | SS | LL | SS | SS |
| 6 | gnf06.058.959   | SS | LL | LL | LL | SS | LL | SS | LL | SS | SS |
| 6 | rs13478818      | SS | LL | LL | LL | SS | LL | SS | SS | LL | SS |
| 6 | rs6411497       | SS | SS | LL | LL | SS | LL | SS | SS | LL | SS |
| 6 | rs13459097      | SS | SS | SS | LL | SS | LL | SS | SS | LL | SS |
| 6 | rs3677567       | SS | SS | SS | LL | SS | LL | SS | SS | LL | SS |
| 6 | rs6156752       | SS | LL | SS | LL | LL | LL | SS | SS | LL | SS |
| 6 | rs6223362       | SS | LL | SS | LL | LL | SS | SS | SS | LL | SS |
| 6 | gnf06.092.758   | SS | LL | SS | LL | LL | SS | LL | SS | LL | SS |
| 6 | rs13478949      | SS | SS | SS | SS | LL | LL | SS | SS | LL | SS |
| 6 | rs6204829       | SS | SS | SS | SS | SS | LL | SS | SS | LL | SS |
| 6 | rs13478999      | SS | SS | SS | SS | SS | LL | SS | SS | LL | SS |
| 6 | rs3722157       | SS | SS | SS | LL | SS | LL | SS | SS | LL | SS |
| 6 | CEL-6_127435117 | SS | SS | SS | LL | LL | LL | SS | SS | LL | SS |
| 6 | rs13479024      | SS | SS | SS | LL | LL | LL | SS | SS | SS | SS |
| 6 | rs6387265       | SS | SS | SS | LL | LL | LL | SS | SS | SS | SS |
| 7 | gnf07.010.101   | SS | LL | LL | LL | LL | LL | SS | LL | SS | SS |
| 7 | UT_7_14.584506  | SS | LL | LL | LL | SS | LL | SS | LL | SS | SS |
| 7 | rs13479154      | SS | LL | LL | LL | SS | LL | SS | LL | SS | SS |
| 7 | rs13479171      | SS | LL | LL | LL | SS | LL | SS | LL | SS | LL |
| 7 | rs3694031       | SS | LL | LL | LL | LL | LL | SS | LL | SS | LL |
| 7 | rs6217275       | SS | LL | LL | LL | LL | LL | SS | LL | SS | LL |
| 7 | gnf07.032.360   | SS | LL | LL | LL | LL | LL | SS | LL | SS | LL |
| 7 | rs3717293       | SS | SS | LL | LL | LL | LL | SS | LL | SS | LL |
| 7 | rs3679779       | SS | SS | LL | LL | LL | LL | SS | LL | SS | LL |

|   |                 |    |    |    |    |    |    |    |    |    |    |
|---|-----------------|----|----|----|----|----|----|----|----|----|----|
| 7 | rs3667441       | SS | SS | LL | LL | LL | LL | SS | LL | SS | LL |
| 7 | rs3723790       | SS | SS | LL | LL | LL | LL | SS | LL | LL | LL |
| 7 | rs3676254       | SS | SS | LL | LL | LL | LL | SS | SS | LL | LL |
| 7 | rs13479342      | SS | SS | LL | LL | LL | LL | SS | SS | LL | LL |
| 7 | rs13479347      | SS | SS | LL | LL | LL | LL | LL | SS | LL | LL |
| 7 | rs8248433       | SS | SS | LL | LL | LL | LL | LL | SS | LL | LL |
| 7 | rs6213614       | SS | SS | LL | LL | LL | LL | SS | SS | LL | LL |
| 7 | UT_7_90.803899  | LL | SS | LL | LL | LL | LL | SS | SS | LL | LL |
| 7 | rs13479470      | LL | SS | LL | LL | LL | LL | SS | SS | LL | LL |
| 7 | rs3656074       | LL | SS | LL | SS | LL | SS | SS | SS | LL | LL |
| 7 | gnf07.120.460   | LL | SS | LL | SS | LL | SS | LL | SS | LL | LL |
| 7 | CEL-7_116160192 | LL | SS | LL | SS | LL | SS | LL | SS | LL | LL |
| 7 | rs8236684       | SS | SS | SS | SS | LL | SS | SS | SS | LL | LL |
| 7 | CEL-7_126301023 | SS | LL | LL | SS | LL | SS | SS | SS | SS | LL |
| 7 | rs6299045       | SS | LL | LL | SS | LL | SS | LL | SS | SS | LL |
| 7 | rs3702894       | SS | LL | LL | SS | LL | SS | LL | SS | SS | LL |
| 7 | rs6216320       | SS | SS | LL | SS | LL | SS | LL | SS | SS | LL |
| 8 | rs6273176       | LL | LL | LL | LL | SS | LL | SS | LL | LL | LL |
| 8 | rs13479601      | LL | LL | LL | LL | LL | LL | SS | LL | LL | LL |
| 8 | rs6288205       | LL | LL | LL | LL | LL | LL | SS | LL | LL | LL |
| 8 | rs13479628      | LL | LL | LL | LL | LL | LL | SS | LL | LL | LL |
| 8 | CEL-8_25677705  | SS | LL | LL | LL | SS | LL | SS | LL | LL | LL |
| 8 | rs13479769      | LL | LL | SS | LL | SS | LL | SS | LL | LL | LL |
| 8 | rs13479784      | LL | LL | SS | LL | LL | LL | SS | LL | LL | LL |
| 8 | rs3672639       | LL | SS | SS | LL | LL | LL | SS | LL | LL | LL |
| 8 | rs6394046       | LL | LL | SS | LL | LL | LL | SS | LL | LL | LL |
| 8 | rs13479873      | LL | LL | SS | LL | LL | LL | SS | LL | LL | SS |
| 8 | rs13479879      | LL | LL | SS | LL | LL | LL | SS | LL | LL | SS |
| 8 | rs3705695       | LL | LL | SS | SS | SS | SS | SS | LL | SS | SS |
| 8 | rs6374927       | SS | LL | SS | LL | SS | SS | SS | LL | SS | SS |
| 8 | rs3675125       | LL | LL | SS | SS | SS | SS | SS | LL | LL | LL |
| 8 | rs8249856       | LL | LL | SS | SS | SS | LL | SS | LL | LL | LL |
| 9 | rs13480065      | LL | SS | LL | LL | SS | LL | SS | SS | LL | SS |
| 9 | rs13480112      | SS | SS | LL | LL | SS | LL | LL | LL | LL | LL |
| 9 | rs6182405       | SS | SS | LL | LL | SS | LL | LL | LL | LL | SS |
| 9 | petM-05537-1    | SS | SS | LL | LL | SS | NA | LL | LL | LL | SS |
| 9 | CEL-9_29909656  | SS | SS | LL | LL | SS | NA | LL | LL | SS | SS |
| 9 | rs13480130      | SS | SS | LL | LL | LL | SS | LL | LL | SS | LL |
| 9 | rs3676086       | SS | SS | LL | LL | LL | LL | LL | LL | SS | LL |
| 9 | rs13480166      | SS | SS | LL | LL | LL | LL | LL | LL | SS | LL |
| 9 | gnf09.044.276   | SS | SS | LL | LL | LL | LL | LL | LL | SS | SS |
| 9 | rs13480191      | SS | SS | LL | LL | LL | SS | LL | LL | SS | SS |

|    |                    |    |    |    |    |    |    |    |    |    |    |
|----|--------------------|----|----|----|----|----|----|----|----|----|----|
| 9  | rs8259443          | SS | SS | LL | LL | LL | SS | LL | LL | SS | SS |
| 9  | rs13480218         | SS | SS | LL | LL | LL | LL | LL | LL | SS | SS |
| 9  | rs13480227         | SS | SS | LL | LL | LL | LL | LL | LL | SS | SS |
| 9  | rs13480247         | SS | SS | LL | SS | LL | LL | LL | LL | SS | SS |
| 9  | rs13480258         | SS | SS | LL | SS | LL | LL | LL | LL | SS | SS |
| 9  | rs3703045          | SS | SS | LL | SS | LL | LL | LL | SS | LL | SS |
| 9  | rs3724833          | SS | SS | LL | LL | LL | LL | LL | SS | LL | SS |
| 9  | rs3670195          | SS | SS | LL | LL | LL | LL | LL | SS | LL | SS |
| 9  | rs13480318         | SS | SS | LL | SS | LL | LL | SS | SS | LL | SS |
| 9  | gnf09.087.298      | SS | SS | LL | SS | LL | LL | LL | SS | LL | SS |
| 9  | rs13480387         | SS | SS | LL | SS | LL | LL | LL | SS | LL | SS |
| 9  | rs3711089          | SS | SS | LL | SS | LL | LL | LL | SS | LL | SS |
| 9  | rs6320810          | SS | LL | SS | SS | LL | LL | LL | LL | SS | SS |
| 9  | rs3669563          | SS | LL | SS | SS | LL | LL | LL | LL | SS | SS |
| 9  | rs13480454         | SS | LL | SS | SS | LL | LL | LL | LL | SS | SS |
| 9  | rs6299531          | SS | LL | SS | SS | LL | LL | LL | LL | LL | SS |
| 9  | rs8241505          | SS | LL | SS | SS | LL | LL | LL | LL | LL | SS |
| 10 | rs13480510         | LL | LL | LL | SS | LL | SS | SS | LL | LL | SS |
| 10 | rs13480516         | LL | LL | LL | SS | LL | SS | SS | LL | LL | SS |
| 10 | rs13480527         | LL | LL | LL | SS | LL | SS | SS | LL | LL | SS |
| 10 | rs3679120          | LL | SS | LL | SS | LL | SS | SS | LL | LL | SS |
| 10 | rs13480547         | LL | SS | LL | SS | LL | SS | SS | LL | LL | SS |
| 10 | rs13480601         | SS | SS | LL | LL | SS | LL | SS | LL | LL | SS |
| 10 | rs3715820          | SS | SS | LL | LL | LL | LL | SS | LL | LL | SS |
| 10 | rs6186864          | SS | SS | LL | LL | SS | LL | SS | LL | LL | SS |
| 10 | rs13480630         | LL | SS | LL | LL | SS | LL | SS | LL | LL | SS |
| 10 | rs13480638         | LL | SS | LL | LL | LL | LL | SS | LL | SS | SS |
| 10 | rs13480652         | LL | LL | LL | LL | LL | LL | SS | LL | SS | SS |
| 10 | rs13480678         | SS | LL | LL | LL | LL | LL | SS | SS | SS | SS |
| 10 | mCV25373751        | SS | LL | LL | LL | LL | LL | SS | SS | SS | LL |
| 10 | rs3661495          | SS | LL | LL | LL | LL | LL | SS | SS | SS | LL |
| 10 | rs3704401          | SS | SS | LL | LL | LL | LL | SS | SS | SS | LL |
| 10 | rs13480739         | SS | SS | LL | LL | LL | LL | SS | SS | SS | LL |
| 10 | rs13480752         | SS | SS | LL | SS | LL | SS | SS | SS | SS | LL |
| 10 | rs4228452          | SS | SS | LL | SS | LL | SS | SS | SS | SS | LL |
| 10 | rs13480773         | LL | SS | LL | SS | LL | SS | SS | SS | SS | LL |
| 10 | CZECH-10_116791624 | LL | SS | LL | SS | LL | SS | SS | SS | SS | LL |
| 10 | rs6335076          | LL | SS | LL | SS | LL | SS | SS | SS | SS | LL |
| 10 | rs6317716          | LL | SS | LL | SS | LL | SS | SS | LL | SS | LL |
| 10 | rs13480808         | LL | SS | LL | SS | LL | SS | LL | LL | LL | LL |
| 11 | rs13480835         | SS | LL | LL | LL | LL | LL | SS | LL | LL | SS |
| 11 | rs6393401          | LL | LL | LL | LL | LL | LL | SS | LL | LL | SS |

|    |                  |    |    |    |    |    |    |    |    |    |    |
|----|------------------|----|----|----|----|----|----|----|----|----|----|
| 11 | rs13480853       | LL | LL | LL | LL | LL | LL | SS | LL | SS | SS |
| 11 | rs3689494        | LL | LL | LL | LL | LL | LL | SS | LL | LL | SS |
| 11 | rs3658216        | LL | LL | LL | LL | LL | LL | SS | LL | SS | SS |
| 11 | rs13480913       | LL | LL | LL | LL | LL | LL | SS | LL | SS | SS |
| 11 | rs13480918       | LL | LL | SS | LL | LL | LL | SS | LL | SS | SS |
| 11 | UT_11_29.443258  | LL | LL | SS | SS | LL | LL | SS | LL | SS | SS |
| 11 | rs3690160        | LL | LL | SS | LL | LL | LL | SS | SS | LL | SS |
| 11 | rs3660692        | LL | LL | SS | SS | LL | SS | SS | SS | LL | SS |
| 11 | rs6326787        | LL | LL | SS | SS | LL | SS | SS | SS | LL | SS |
| 11 | rs6199956        | LL | LL | LL | SS | LL | SS | SS | SS | LL | SS |
| 11 | rs13481031       | LL | LL | LL | LL | LL | SS | SS | SS | LL | SS |
| 11 | rs3684076        | SS | LL | LL | LL | LL | SS | SS | SS | LL | SS |
| 11 | rs13481050       | SS | SS | LL | LL | SS | SS | SS | SS | LL | SS |
| 11 | rs3714311        | LL | SS | LL | LL | SS | SS | SS | LL | LL | SS |
| 11 | rs13481075       | LL | LL | LL | LL | SS | SS | SS | LL | LL | SS |
| 11 | rs13481093       | LL | LL | LL | LL | SS | SS | SS | SS | LL | SS |
| 11 | CEL-11_73459270  | LL | LL | LL | LL | SS | LL | SS | SS | LL | SS |
| 11 | rs6178421        | SS | LL | LL | LL | SS | LL | SS | SS | LL | SS |
| 11 | rs13481123       | SS | LL | LL | LL | SS | LL | SS | SS | LL | SS |
| 11 | rs3661657        | SS | LL | LL | LL | SS | LL | SS | SS | LL | SS |
| 11 | rs3688955        | SS | LL | LL | LL | SS | LL | SS | SS | LL | SS |
| 11 | rs13481161       | SS | LL | LL | LL | SS | LL | SS | SS | LL | SS |
| 11 | rs3686162        | SS | LL | LL | LL | SS | LL | SS | SS | LL | SS |
| 11 | rs13474433       | SS | LL | LL | SS | SS | LL | SS | SS | LL | SS |
| 11 | rs3695865        | SS | LL | LL | SS | SS | LL | SS | SS | LL | SS |
| 11 | rs6180460        | SS | LL | LL | SS | LL | LL | SS | SS | LL | SS |
| 11 | rs6407687        | SS | LL | LL | SS | LL | LL | SS | SS | LL | SS |
| 11 | rs13481210       | SS | LL | LL | SS | SS | LL | SS | SS | LL | SS |
| 11 | rs13481220       | SS | LL | LL | SS | SS | LL | SS | SS | SS | SS |
| 11 | rs13481228       | SS | LL | LL | SS | SS | SS | SS | SS | SS | SS |
| 11 | rs13481233       | SS | LL | LL | SS | SS | LL | SS | SS | SS | SS |
| 11 | gnf11.121.400    | LL | LL | LL | SS | SS | LL | SS | SS | LL | SS |
| 11 | rs3662930        | LL | LL | LL | SS | SS | LL | SS | SS | LL | SS |
| 11 | gnf11.125.992    | LL | LL | LL | SS | LL | LL | SS | SS | LL | SS |
| 11 | CEL-11_118234030 | LL | LL | LL | SS | SS | LL | SS | SS | LL | SS |
| 12 | rs3699421        | SS | SS | LL | LL | LL | LL | LL | LL | SS | SS |
| 12 | rs13481308       | SS | SS | LL | LL | LL | LL | LL | LL | SS | SS |
| 12 | rs6328018        | SS | SS | LL | LL | LL | LL | LL | LL | SS | SS |
| 12 | UT_12_24.561109  | SS | SS | LL | LL | LL | LL | LL | LL | SS | SS |
| 12 | rs3695382        | SS | SS | LL | LL | LL | LL | LL | LL | SS | SS |
| 12 | rs13481408       | SS | SS | LL | LL | SS | LL | LL | LL | SS | LL |
| 12 | rs6317361        | SS | SS | LL | LL | SS | LL | SS | SS | SS | LL |

|    |               |    |    |    |    |    |    |    |    |    |    |
|----|---------------|----|----|----|----|----|----|----|----|----|----|
| 12 | gnf12.053.286 | SS | SS | LL | LL | SS | SS | SS | SS | SS | LL |
| 12 | rs3660822     | SS | SS | LL | LL | SS | SS | SS | SS | SS | LL |
| 12 | rs6335879     | SS | SS | LL | LL | SS | SS | SS | SS | SS | LL |
| 12 | rs3687032     | SS | SS | LL | LL | SS | SS | SS | SS | LL | LL |
| 12 | rs3709008     | SS | SS | LL | LL | SS | SS | LL | SS | LL | LL |
| 12 | rs3682382     | SS | SS | LL | LL | SS | SS | LL | SS | LL | LL |
| 12 | rs3654718     | SS | LL | LL | LL | SS | SS | LL | SS | LL | LL |
| 12 | rs13481561    | SS | LL | LL | LL | SS | SS | SS | SS | LL | LL |
| 12 | rs6263380     | SS | LL | LL | LL | SS | LL | SS | SS | LL | LL |
| 12 | rs13481571    | SS | LL | LL | LL | LL | SS | SS | SS | SS | SS |
| 12 | rs3711162     | LL | LL | LL | LL | LL | SS | SS | SS | SS | SS |
| 12 | rs6288403     | LL | LL | LL | LL | LL | LL | SS | SS | SS | SS |
| 12 | rs13481592    | LL | LL | LL | SS | SS | LL | SS | SS | SS | SS |
| 12 | rs3679514     | LL | LL | LL | SS | SS | LL | LL | SS | SS | SS |
| 12 | rs13481618    | LL | LL | LL | SS | SS | LL | LL | SS | SS | SS |
| 12 | rs13481632    | LL | LL | LL | LL | SS | LL | LL | SS | SS | LL |
| 12 | rs13481641    | LL | LL | LL | LL | SS | LL | LL | SS | SS | LL |
| 12 | rs13481651    | LL | LL | LL | LL | SS | LL | LL | SS | SS | LL |
| 12 | rs4229612     | LL | LL | LL | SS | LL | SS | LL | SS | SS | LL |
| 13 | rs6215262     | LL | SS | SS | SS | SS | LL | SS | SS | SS | LL |
| 13 | rs13481702    | LL | SS | SS | SS | SS | SS | SS | SS | SS | LL |
| 13 | rs13481706    | LL | SS | SS | SS | SS | SS | SS | SS | LL | LL |
| 13 | rs3678616     | LL | SS | SS | SS | SS | SS | SS | SS | LL | LL |
| 13 | gnf13.016.175 | LL | SS | SS | SS | SS | SS | SS | SS | LL | LL |
| 13 | rs4229685     | LL | SS | LL | SS | SS | SS | SS | SS | SS | SS |
| 13 | rs3724709     | LL | SS | LL | SS | LL | SS | SS | SS | SS | SS |
| 13 | gnf13.038.133 | SS | SS | LL | SS | LL | SS | SS | SS | SS | SS |
| 13 | rs6271232     | SS | SS | LL | LL | LL | SS | SS | SS | SS | SS |
| 13 | rs3688207     | SS | SS | LL | LL | LL | SS | SS | SS | SS | SS |
| 13 | rs13481823    | SS | SS | LL | LL | LL | SS | SS | LL | SS | SS |
| 13 | gnf13.057.762 | LL | SS | LL | LL | LL | SS | SS | LL | SS | SS |
| 13 | rs6410679     | LL | SS | LL | LL | LL | SS | SS | LL | LL | SS |
| 13 | rs6381045     | LL | SS | LL | LL | LL | SS | SS | LL | LL | SS |
| 13 | rs3721965     | LL | SS | LL | LL | LL | SS | SS | LL | LL | SS |
| 13 | rs13481886    | LL | SS | LL | LL | SS | SS | SS | LL | LL | SS |
| 13 | rs13481892    | LL | SS | LL | LL | SS | LL | SS | LL | LL | SS |
| 13 | mCV24625340   | LL | SS | LL | LL | SS | LL | SS | LL | LL | LL |
| 13 | gnf13.092.499 | LL | SS | SS | LL | SS | LL | SS | LL | LL | LL |
| 13 | rs13481958    | LL | SS | SS | LL | SS | LL | SS | LL | LL | LL |
| 13 | rs3688959     | LL | SS | SS | LL | LL | LL | SS | SS | LL | LL |
| 13 | rs6389588     | LL | SS | LL | LL | LL | LL | SS | SS | LL | LL |
| 13 | rs13482000    | LL | SS | LL | LL | LL | LL | SS | SS | LL | LL |

|    |                  |    |    |    |    |    |    |    |    |    |    |
|----|------------------|----|----|----|----|----|----|----|----|----|----|
| 13 | mCV24886326      | LL | SS | LL | SS | LL | LL | SS | SS | SS | LL |
| 13 | rs6247696        | LL | SS | LL | SS | LL | SS | SS | SS | SS | LL |
| 13 | rs6397687        | LL | LL | LL | SS | LL | SS | SS | SS | SS | LL |
| 14 | rs3687889        | SS | LL | LL | LL | LL | LL | SS | SS | SS | SS |
| 14 | rs6397486        | SS | LL | LL | LL | LL | LL | SS | SS | SS | SS |
| 14 | mCV23128760      | SS | LL | LL | LL | LL | LL | SS | LL | SS | SS |
| 14 | rs3701623        | SS | LL | LL | LL | LL | LL | SS | LL | SS | SS |
| 14 | rs13482262       | SS | LL | LL | LL | LL | LL | SS | SS | SS | SS |
| 14 | rs6352085        | SS | LL | LL | LL | LL | LL | SS | SS | SS | SS |
| 14 | rs13482276       | SS | LL | LL | LL | LL | LL | SS | SS | SS | SS |
| 14 | rs13482281       | SS | LL | LL | LL | LL | LL | SS | SS | SS | SS |
| 14 | rs13482296       | SS | LL | LL | SS | LL | SS | SS | SS | SS | SS |
| 14 | rs6211694        | SS | LL | LL | SS | LL | SS | SS | LL | SS | SS |
| 14 | CEL-14_110783830 | SS | LL | LL | SS | LL | SS | SS | LL | SS | SS |
| 14 | rs3707842        | SS | LL | LL | SS | LL | SS | SS | LL | SS | SS |
| 14 | gnf14.117.278    | SS | LL | LL | SS | LL | SS | SS | LL | SS | SS |
| 14 | rs13482416       | SS | LL | LL | SS | LL | SS | SS | LL | SS | SS |
| 15 | rs13459176       | SS | LL | LL | LL | LL | LL | LL | SS | LL | LL |
| 15 | rs13482431       | SS | LL | LL | LL | LL | LL | LL | SS | LL | LL |
| 15 | rs13482446       | SS | LL | SS | LL | LL | LL | LL | SS | LL | SS |
| 15 | CEL-15_15919629  | SS | SS | SS | LL | LL | LL | LL | SS | LL | SS |
| 15 | rs13482461       | SS | SS | SS | LL | LL | SS | LL | SS | LL | SS |
| 15 | rs13482486       | SS | SS | SS | LL | LL | SS | LL | SS | LL | SS |
| 15 | rs3670581        | SS | SS | SS | LL | LL | SS | SS | SS | LL | SS |
| 15 | rs13482498       | SS | SS | SS | SS | LL | SS | SS | SS | LL | SS |
| 15 | rs3088525        | SS | SS | SS | SS | LL | SS | SS | SS | LL | SS |
| 15 | rs6188239        | SS | SS | SS | LL | LL | SS | SS | SS | LL | SS |
| 15 | rs3695416        | SS | LL | SS | LL | LL | SS | SS | SS | LL | SS |
| 15 | rs3677296        | SS | LL | SS | LL | LL | SS | SS | SS | LL | SS |
| 15 | rs13482536       | SS | LL | SS | SS | LL | LL | SS | SS | SS | SS |
| 15 | rs13482541       | SS | LL | SS | LL | LL | LL | SS | SS | SS | SS |
| 15 | rs3660290        | SS | LL | SS | LL | LL | LL | SS | SS | SS | SS |
| 15 | rs13482589       | SS | SS | SS | LL | LL | LL | SS | SS | SS | SS |
| 15 | rs13482595       | SS | SS | SS | LL | LL | LL | LL | SS | SS | SS |
| 15 | rs13482612       | SS | SS | SS | LL | LL | LL | SS | SS | LL | SS |
| 15 | rs13482618       | SS | SS | SS | LL | LL | LL | SS | SS | LL | SS |
| 15 | rs6197332        | SS | SS | SS | LL | LL | LL | SS | SS | LL | SS |
| 15 | rs13482642       | SS | SS | SS | SS | LL | LL | SS | SS | LL | SS |
| 15 | rs6287697        | LL | SS | SS | SS | LL | LL | SS | LL | LL | SS |
| 15 | rs13482711       | SS | SS | SS | SS | LL | LL | SS | LL | LL | SS |
| 15 | rs13482719       | SS | SS | LL | SS | LL | LL | SS | LL | LL | SS |
| 15 | rs13482726       | SS | SS | LL | SS | LL | SS | SS | LL | LL | SS |

|    |               |    |    |    |    |    |    |    |    |    |    |
|----|---------------|----|----|----|----|----|----|----|----|----|----|
| 15 | rs13482732    | SS | SS | SS | SS | LL | SS | SS | LL | LL | SS |
| 15 | rs3708604     | SS | SS | SS | LL | LL | SS | LL | LL | LL | SS |
| 15 | rs13482741    | SS | SS | SS | LL | LL | LL | LL | LL | LL | SS |
| 16 | rs4152386     | LL | SS | LL | SS | SS | SS | SS | LL | SS | SS |
| 16 | rs4165119     | LL | SS | LL | LL | SS | LL | SS | LL | SS | LL |
| 16 | rs6294027     | LL | SS | LL | LL | SS | LL | LL | LL | SS | LL |
| 16 | rs4172338     | LL | SS | LL | SS | SS | SS | LL | LL | SS | LL |
| 16 | rs4173709     | LL | SS | SS | SS | SS | SS | LL | LL | SS | LL |
| 16 | rs4175608     | LL | SS | SS | SS | SS | SS | LL | LL | SS | LL |
| 16 | rs4177203     | LL | SS | SS | SS | SS | SS | LL | LL | SS | LL |
| 16 | rs4179117     | SS | SS | SS | SS | SS | SS | SS | LL | SS | SS |
| 16 | rs4184315     | SS | SS | SS | SS | LL | SS | SS | LL | SS | SS |
| 16 | rs4185176     | SS | SS | SS | SS | LL | SS | SS | LL | SS | SS |
| 16 | rs6271301     | SS | SS | SS | SS | SS | SS | SS | LL | SS | SS |
| 16 | rs4192132     | SS | SS | SS | SS | SS | SS | SS | LL | SS | LL |
| 16 | rs4197416     | SS | SS | SS | SS | SS | SS | SS | LL | SS | LL |
| 16 | rs4197725     | SS | LL | SS | SS | SS | SS | SS | LL | SS | LL |
| 16 | rs4202372     | SS | LL | SS | SS | SS | SS | SS | LL | SS | LL |
| 16 | rs4203891     | SS | SS | SS | SS | SS | LL | SS | LL | SS | LL |
| 16 | rs4205524     | SS | SS | SS | SS | SS | LL | SS | LL | SS | LL |
| 16 | rs4211515     | SS | SS | SS | SS | SS | LL | SS | LL | SS | LL |
| 16 | rs4211731     | SS | SS | SS | SS | SS | SS | SS | LL | SS | LL |
| 16 | rs4219239     | SS | SS | LL | SS | SS | SS | SS | LL | SS | LL |
| 16 | rs4219897     | SS | SS | LL | SS | SS | SS | SS | LL | SS | SS |
| 17 | rs3724616     | LL | SS | LL | LL | LL | LL | LL | SS | SS | LL |
| 17 | rs3702484     | SS | SS | LL | LL | LL | LL | SS | SS | SS | LL |
| 17 | rs4231344     | SS | SS | LL | LL | SS | LL | SS | SS | SS | LL |
| 17 | rs3090500     | SS | SS | LL | SS | SS | LL | SS | SS | SS | LL |
| 17 | rs4136360     | SS | SS | LL | SS | SS | NA | SS | SS | SS | LL |
| 17 | rs6358703     | SS | LL | LL | SS | SS | NA | SS | SS | SS | LL |
| 17 | rs13482947    | LL | LL | LL | SS | LL | NA | SS | SS | SS | LL |
| 17 | gnf17.035.152 | LL | LL | LL | SS | LL | NA | SS | SS | SS | LL |
| 17 | rs13482968    | LL | LL | LL | LL | LL | NA | SS | SS | SS | LL |
| 17 | rs13482973    | LL | LL | LL | LL | LL | NA | SS | SS | SS | LL |
| 17 | rs3090988     | LL | LL | LL | LL | LL | LL | SS | SS | SS | LL |
| 17 | mCV22888090   | LL | LL | LL | SS | LL | LL | LL | LL | SS | LL |
| 17 | rs13483075    | LL | LL | LL | SS | LL | SS | LL | LL | SS | LL |
| 17 | rs6322076     | LL | LL | SS | SS | LL | LL | LL | LL | SS | LL |
| 17 | rs6386440     | LL | LL | SS | SS | LL | LL | LL | LL | SS | SS |
| 17 | rs3684732     | LL | SS | SS | LL | SS | SS | SS | LL | SS | SS |
| 17 | rs3701338     | LL | SS | SS | LL | SS | SS | LL | LL | SS | SS |
| 17 | rs13483144    | LL | SS | SS | LL | SS | SS | LL | LL | SS | SS |



|    |                 |    |    |    |    |    |    |    |    |    |    |
|----|-----------------|----|----|----|----|----|----|----|----|----|----|
| 18 | rs13483183      | LL | LL | SS | LL | LL | LL | SS | LL | SS | LL |
| 18 | rs13483200      | SS | LL | SS | LL | LL | LL | SS | LL | SS | LL |
| 18 | rs13483210      | SS | LL | SS | LL | LL | LL | SS | LL | SS | LL |
| 18 | mCV23617245     | LL | LL | SS | LL | LL | LL | SS | LL | SS | LL |
| 18 | rs6194744       | LL | LL | LL | LL | LL | LL | SS | LL | SS | LL |
| 18 | rs13483262      | LL | LL | LL | LL | LL | LL | SS | SS | SS | LL |
| 18 | rs13483277      | LL | LL | LL | LL | LL | LL | SS | SS | LL | LL |
| 18 | CEL-18_32158369 | LL | LL | LL | LL | LL | LL | SS | SS | LL | LL |
| 18 | rs3675531       | LL | LL | SS | LL | LL | LL | SS | SS | LL | LL |
| 18 | gnf18.033.953   | LL | LL | SS | LL | SS | LL | SS | SS | LL | LL |
| 18 | rs13483319      | LL | LL | SS | LL | SS | LL | SS | SS | LL | SS |
| 18 | rs6313313       | LL | LL | SS | SS | SS | SS | SS | SS | LL | SS |
| 18 | rs3676196       | SS | LL | SS | SS | SS | SS | SS | SS | LL | SS |
| 18 | rs13483340      | SS | LL | SS | SS | SS | SS | SS | SS | LL | SS |
| 18 | rs6184541       | SS | LL | LL | SS | SS | SS | SS | SS | LL | SS |
| 18 | rs3654438       | SS | LL | LL | SS | SS | SS | SS | SS | LL | SS |
| 18 | rs3688789       | SS | LL | LL | SS | SS | SS | SS | LL | LL | SS |
| 18 | rs3716803       | SS | LL | LL | SS | SS | SS | LL | LL | LL | SS |
| 18 | rs13483423      | SS | LL | LL | SS | SS | SS | LL | SS | LL | SS |
| 18 | gnf18.069.928   | SS | LL | LL | SS | SS | SS | SS | SS | LL | SS |
| 18 | rs6302629       | SS | LL | LL | SS | LL | SS | SS | SS | LL | SS |
| 18 | rs3705890       | SS | LL | LL | SS | LL | SS | SS | SS | LL | SS |
| 18 | rs3671707       | LL | LL | LL | SS | LL | SS | LL | SS | LL | SS |
| 18 | rs13483466      | LL | LL | LL | SS | SS | SS | LL | SS | LL | SS |
| 19 | rs3713033       | LL | LL | SS | LL | SS | LL | LL | LL | SS | LL |
| 19 | rs13483526      | LL | LL | SS | LL | SS | LL | LL | LL | SS | LL |
| 19 | rs6316813       | LL | LL | SS | SS | SS | SS | LL | LL | SS | LL |
| 19 | rs6307076       | LL | LL | SS | SS | SS | SS | LL | LL | SS | LL |
| 19 | rs6342493       | SS | LL | SS | SS | SS | SS | LL | LL | LL | SS |
| 19 | rs6291559       | SS | LL | SS | SS | SS | SS | LL | LL | LL | LL |
| 19 | rs3714482       | SS | LL | LL | SS | SS | SS | LL | LL | LL | LL |
| 19 | CEL-19_32349880 | SS | LL | SS | SS | SS | SS | LL | LL | SS | SS |
| 19 | rs13483650      | SS | LL | SS | SS | LL | SS | LL | SS | LL | SS |
| 19 | CEL-19_48242857 | SS | LL | SS | SS | LL | SS | LL | SS | LL | SS |
| 19 | rs13483677      | SS | LL | SS | SS | LL | SS | LL | SS | LL | SS |
| 19 | rs3711945       | SS | LL | SS | SS | SS | SS | LL | SS | LL | SS |
| X  | rs13483712      | LL | SS | LL | LL | SS | LL | LL | LL | SS | LL |
| X  | rs13483724      | LL | SS | LL | LL | LL | LL | LL | LL | SS | LL |
| X  | rs13483777      | LL | SS | LL | LL | LL | LL | SS | LL | SS | LL |
| X  | rs13483884      | LL | SS | LL | LL | LL | LL | SS | LL | SS | LL |
| X  | rs13483899      | SS | SS | LL | LL | LL | LL | SS | LL | SS | LL |
| X  | gnfX.084.751    | SS | SS | LL | LL | LL | LL | SS | LL | SS | LL |

|   |                 |    |    |    |    |    |    |    |    |    |    |
|---|-----------------|----|----|----|----|----|----|----|----|----|----|
| X | gnfX.086.039    | SS | SS | LL | LL | LL | LL | SS | LL | SS | LL |
| X | rs13483951      | SS | SS | LL | SS | LL | LL | SS | LL | SS | LL |
| X | rs6205221       | SS | LL | LL | SS | LL | LL | SS | LL | SS | LL |
| X | rs13484003      | SS | LL | LL | LL | LL | LL | SS | LL | SS | LL |
| X | gnfX.118.600    | SS | LL | LL | LL | LL | LL | SS | LL | SS | LL |
| X | rs13484038      | SS | LL | LL | LL | LL | LL | SS | LL | LL | LL |
| X | gnfX.124.190    | SS | LL | LL | LL | LL | LL | SS | LL | SS | LL |
| X | CEL-X_133525088 | SS | SS | LL | LL | LL | LL | SS | LL | SS | LL |
| X | rs13484050      | SS | SS | LL | LL | LL | LL | SS | LL | SS | LL |
| X | rs13484093      | SS | SS | LL | LL | LL | LL | LL | LL | LL | LL |
| X | rs13484094      | SS | SS | LL | LL | LL | LL | LL | LL | LL | LL |

---
